# Supplementary material for: Global shortage of neonatal and paediatric antibiotic trials: rapid review
Source: PubMed Central journal article supplement — BMJ Open. 2017 Oct 13;7(10):e016293. doi: 10.1136/bmjopen-2017-016293 (PMC5652566; doi:10.1136/bmjopen-2017-016293), 2017-10-13
Supplement: bmjopen-2017-016293.draft_revisions.pdf [file bmjopen-2017-016293.draft_revisions.pdf]

# BMJ Open

BMJ Open is committed to open peer review. As part of this commitment we make the peer review history of every article we publish publicly available.

When an article is published we post the peer reviewers' comments and the authors' responses online. We also post the versions of the paper that were used during peer review. These are the versions that the peer review comments apply to.

The versions of the paper that follow are the versions that were submitted during the peer review process. They are not the versions of record or the final published versions. They should not be cited or distributed as the published version of this manuscript.

BMJ Open is an open access journal and the full, final, typeset and author-corrected version of record of the manuscript is available on our site with no access controls, subscription charges or pay-per-view fees (<http://bmjopen.bmj.com>).

If you have any questions on BMJ Open's open peer review process please email [editorial.bmjopen@bmj.com](mailto:editorial.bmjopen@bmj.com)

# BMJ Open

## A global shortage of neonatal and pediatric antibiotic trials.

|                                 |                                                                                                                                                                                                                                                                                                                                                                                                                                                                                                                                                                                                                                                                                                                                                                                                     |
|---------------------------------|-----------------------------------------------------------------------------------------------------------------------------------------------------------------------------------------------------------------------------------------------------------------------------------------------------------------------------------------------------------------------------------------------------------------------------------------------------------------------------------------------------------------------------------------------------------------------------------------------------------------------------------------------------------------------------------------------------------------------------------------------------------------------------------------------------|
| Journal:                        | <i>BMJ Open</i>                                                                                                                                                                                                                                                                                                                                                                                                                                                                                                                                                                                                                                                                                                                                                                                     |
| Manuscript ID                   | bmjopen-2017-016293                                                                                                                                                                                                                                                                                                                                                                                                                                                                                                                                                                                                                                                                                                                                                                                 |
| Article Type:                   | Research                                                                                                                                                                                                                                                                                                                                                                                                                                                                                                                                                                                                                                                                                                                                                                                            |
| Date Submitted by the Author:   | 07-Feb-2017                                                                                                                                                                                                                                                                                                                                                                                                                                                                                                                                                                                                                                                                                                                                                                                         |
| Complete List of Authors:       | Thompson, Georgina; St George's University of London, Infection and Immunity; University of Exeter Medical School<br>Barker, Charlotte; St George's University of London, Infection and Immunity; University College London Institute of Child Health<br>Folgori, Laura; St George's University of London, Paediatric Infectious Diseases Research Group<br>Bielicki, Julia; St George's University London, Division of Clinical Sciences; University of Basel Children's Hospital<br>Bradley, John; University of California San Diego School of Medicine, Department of Pediatrics<br>Lutsar, Irja; University of Tartu, Department of Medical Microbiology<br>sharland, mike; St George's University of London, Infection and Immunity; St Georges Hospital, Paediatric Infectious Diseases Unit |
| <b>Primary Subject Heading</b>: | Paediatrics                                                                                                                                                                                                                                                                                                                                                                                                                                                                                                                                                                                                                                                                                                                                                                                         |
| Secondary Subject Heading:      | Infectious diseases                                                                                                                                                                                                                                                                                                                                                                                                                                                                                                                                                                                                                                                                                                                                                                                 |
| Keywords:                       | Paediatric infectious disease & immunisation < PAEDIATRICS, INFECTIOUS DISEASES, PAEDIATRICS                                                                                                                                                                                                                                                                                                                                                                                                                                                                                                                                                                                                                                                                                                        |
|                                 |                                                                                                                                                                                                                                                                                                                                                                                                                                                                                                                                                                                                                                                                                                                                                                                                     |

SCHOLARONE™  
Manuscripts

## A global shortage of neonatal and pediatric antibiotic trials.

G. Thompson<sup>1,2</sup>, C. Barker<sup>1,3,4</sup>, L. Folgori<sup>1</sup>, J. Bielicki<sup>1,5</sup>, J. Bradley<sup>6,7</sup>, I. Lutsar<sup>8</sup>, M. Sharland<sup>1,4</sup>

<sup>1</sup>Paediatric Infectious Diseases Research Group, Institute for Infection and Immunity, St George's University of London, London, UK

<sup>2</sup>University of Exeter, Exeter, UK

<sup>3</sup>Inflammation, Infection and Rheumatology Section, UCL Great Ormond Street Institute of Child Health, 30 Guilford Street, London, UK

<sup>4</sup>St George's University Hospitals NHS Foundation Trust, Blackshaw Road, London, UK

<sup>5</sup>Paediatric Pharmacology and Pharmacometrics, University of Basel Children's Hospital, Basel, Switzerland

<sup>6</sup>Department of Pediatrics, School of Medicine, University of California San Diego, CA, United States

<sup>7</sup>Rady Children's Hospital San Diego, San Diego, CA, United States

<sup>8</sup>Department of Medical Microbiology, University of Tartu, Tartu, Estonia

### Corresponding author

Georgina Thompson

Paediatric Infectious Diseases Research Group

St George's, University of London

Jenner Wing, Level 2, Room 2.216F, Mail Point J2C

London SW17 0RE

Telephone: 07880325494

Email: gethoms@sgul.ac.uk

**Word count:** 2607

## ABSTRACT

**Objectives:** There have been few clinical trials (CTs) on antibiotics which inform neonatal and pediatric drug labelling. Consequently, the rate of unlicensed and off-label prescribing in pediatrics remains high. This remains a major concern, particularly in neonates. It is unclear whether the current pediatric antibiotic research pipeline is adequate to inform optimal drug dosing. Using ClinicalTrials.gov registry, this review aims to establish the current global status of antibiotic CTs in children up to 18 years of age.

**Results:** Only 76 registered open CTs of antibiotics in children were identified globally; 23 (30%) were recruiting newborns (only 8 (11%) included preterm neonates), 52 (68%) infants and toddlers, 58 (76%) children, and 54 (71%) adolescents. The majority of registered trials were late phase (10 (15%) Phase 3 and 23 (35%) Phase 4/pharmacovigilance). Two-thirds were sponsored by non-profit organisations, with few sponsored by pharmaceutical companies (50 (66%) vs. 26 (34%) respectively). A greater proportion of non-profit funded trials were efficacy-based strategic trials (n=34, 68%), in comparison to industry-led trials, which were most often focused on safety or pharmacokinetic data (n=17, 65%). Our search revealed that 2 of the 37 antibiotics listed on the May 2016 Pew Charitable Trusts antibiotic development pipeline, currently being studied in adults, appear to be recruiting in open pediatric CTs.

**Conclusions:** This review highlights that there are currently very few pediatric antibiotic CTs being conducted globally (especially in neonates). There is striking disparity noted between antibiotic drug development programmes involving adults and children.

### Strengths and limitations of this study

- A narrative literature review of registered clinical trials in children.
- Explicit reproducible methodology.
- Search strategy limited to ClinicalTrials.gov and EudraCT. Entirety of clinical research in this field might not have been captured.
- Search strategy also limited to open clinical trials. Active but not yet recruiting trials were not captured.

## INTRODUCTION

With the persistence of widespread unlicensed and off-label prescribing in pediatrics – as high as 11.4% and 46.5% respectively – the paucity of clinical research involving children that which is conducted to inform optimal drug dosing, licensing and labelling remains a problem.[1] For certain medicines, drug efficacy can be extrapolated from adult data provided that the pathology and pharmacology (including drug exposure) are the same, or sufficiently similar in children as in adults.[2,3] Advances in modelling and simulation mean smaller focussed studies can now be

1  
2  
3 performed to help obtain regulatory approval for most medicines, including antimicrobials.[4]  
4 Although differences in drug pharmacokinetics (PK) in neonates and children can lead to adverse  
5 reactions that are not seen in adult populations, these are very rare and extrapolation of safety data  
6 into the pediatric population can further reduce the need for complex study designs.[5]  
7  
8  
9

10 Since antibiotics are the most commonly prescribed medicines in children, it is important to improve  
11 our currently limited understanding of their pharmacokinetic profiles to help determine optimal drug  
12 dosing and ultimately to improve patient outcomes.[6] Suboptimal antibiotic dosing, including both  
13 under- or over-dosing, can lead to toxicity or failure to meet therapeutic targets, which not only  
14 contributes to treatment failure, but may also drive antimicrobial resistance through encouragement  
15 of selection pressures on drug-resistant strains of bacteria.[7] In the last decade several initiatives  
16 have been established to encourage pediatric medicines research, thus bridge the gap between  
17 adult and pediatric drug development plans. Such initiatives include the Pediatric Regulation  
18 (Pediatric Investigation Plans (PIPs), introduced by the European Medicines Agency (EMA),[8] and  
19 Pediatric Study Plans (PSPs), by the U.S. Food and Drug Administration (FDA).[9] Despite this,  
20 there remain limited advances in the development of antibiotics for this population.[10]  
21  
22  
23  
24  
25  
26  
27  
28

29 The global status of clinical research on antibiotics in pediatrics is currently unknown. Using  
30 registered records of clinical trials (CTs) on *ClinicalTrials.gov*, this review aims (i) to summarise the  
31 current global status of registered antibiotic research in children and neonates, and (ii) to stimulate  
32 discussion and collaboration among the relevant stakeholders on the neglect of antibiotic research  
33 in pediatrics.  
34  
35  
36  
37  
38  
39

## 40 **METHODS**

### 41 **Data sources**

42 The *ClinicalTrials.gov* registry (last accessed 8<sup>th</sup> November 2016) is an international platform for the  
43 registration of CTs. It is a web-based registry, developed in 2000 by the National Institute of Health  
44 (NIH) and the FDA, to which trials from 50 states and 163 countries around the world are registered.  
45 All information provided for each trial is updated periodically by the trial's sponsoring organisation.  
46 The database has a specific child filter, which uses a key word paradigm to select all registered  
47 trials recruiting patients/participants up to 18 years of age.  
48  
49  
50  
51  
52

### 53 **Study selection**

54 Our records were identified using suitable key word searches, in which the search terms were  
55 (antimicrobial\* OR antibiotic\* OR anti-infective agent\*) AND Child AND Open Studies. All identified  
56 trials were filtered manually using inclusion and exclusion criteria. Interventional and observational  
57  
58  
59  
60

1  
2  
3 trials on antimicrobials recruiting children up to 18 years of age were considered eligible for  
4 inclusion. No specific temporal filter was applied since only open or ongoing clinical trials were of  
5 interest. The following records, which were not investigating one or more antibiotics, were excluded:  
6 trials of antifungals, antivirals, antiprotozoal, antimycotics, pro- or pre- biotics, antiseptics, topical or  
7 inhalational treatments, prophylactic antibiotics, investigating alternative use for antibiotics (for  
8 example as anti-inflammatory agents), and trials involving pregnant women or cystic fibrosis,  
9 tuberculosis, HIV, febrile neutropenia, and malaria patients.  
10  
11  
12  
13

14  
15 All eligible records were identified via manual filtering by GT CB, LF and MS.  
16  
17

### 18 **Data extraction**

19 The following information was collected from the included records: unique NCT number, recruitment  
20 status, study design, trial phase, study sponsor, age group and sex eligibility, clinical indication,  
21 geographic region of recruitment, antibiotic being investigated, and endpoint classification.  
22 Outcomes were categorised as safety, efficacy or PK. Economic setting (based on geographic  
23 region of recruitment) was classified using The World Bank classification.[11]  
24  
25  
26  
27

28  
29 The specific class of antibiotic studied in each trial was identified and classified using the World  
30 Health Organisation (WHO) ATC/DDD index.[12] To investigate whether novel antibiotics are being  
31 studied in pediatric and neonatal populations (as well as in adults), the antibiotics currently studied  
32 in children were compared with the *Pew Charitable Trusts Antibiotics Currently in Clinical*  
33 *Development* pipeline, which identifies novel antibiotics currently under development for the U.S.  
34 market.[13]  
35  
36  
37  
38

### 39 **RESULTS**

40  
41 Our search identified 1056 records. 603 records were excluded on title because they were studies  
42 not involving an antimicrobial. 453 records were investigating one or more antimicrobials and  
43 recruiting children below 18 years of age. Among the 195 trials investigating antibiotics, 76 fulfilled  
44 our inclusion and exclusion criteria and were included in the final analysis. Reasons for exclusion  
45 are summarised in Figure 1.  
46  
47  
48  
49  
50

51 All 76 CTs identified were open as of 8<sup>th</sup> November 2016, and 63 (83%) of these were recognised  
52 as recruiting participants on this date (Table 1). All trials stated recruitment of both male and female  
53 participants.  
54  
55  
56  
57  
58  
59  
60

**Table 1.** Characteristics of clinical trials.

| Characteristic                 | Category                                   | Number of studies, n (%) |
|--------------------------------|--------------------------------------------|--------------------------|
| <b>Age group</b>               | Preterm neonates                           | 1 (1) <sup>a</sup>       |
|                                | Neonates (total)                           | 23 (30)                  |
|                                | Infants and toddlers                       | 52 (68)                  |
|                                | Children                                   | 58 (76)                  |
|                                | Adolescents                                | 54 (71)                  |
| <b>Recruitment status</b>      | Recruiting                                 | 63 (83)                  |
|                                | Not yet recruiting                         | 13 (17)                  |
| <b>Study design</b>            | Interventional                             | 66 (87)                  |
|                                | Observational                              | 10 (13)                  |
| <b>Trial phase<sup>b</sup></b> | Phase 1                                    | 10 (15)                  |
|                                | Phase 1-2                                  | 1 (2)                    |
|                                | Phase 2                                    | 9 (14)                   |
|                                | Phase 2-3                                  | 3 (5)                    |
|                                | Phase 3                                    | 10 (15)                  |
|                                | Phase 4                                    | 23 (39)                  |
|                                | Not specified                              | 10 (15)                  |
| <b>Sponsor</b>                 | Industry                                   | 26 (34)                  |
|                                | Non-profit                                 | 50 (66)                  |
| <b>Geographic region</b>       | Africa                                     | 8 (11)                   |
|                                | Asia                                       | 16 (21)                  |
|                                | Europe                                     | 22 (29)                  |
|                                | Latin America                              | 6 (8)                    |
|                                | North America                              | 34 (45)                  |
|                                | Oceania                                    | 5 (7)                    |
| <b>Antibiotic class</b>        | J01A Tetracycline                          | 4 (5)                    |
|                                | J01C Beta-lactam, Penicillin               | 25 (33)                  |
|                                | J01D Other Beta-lactam                     | 22 (29)                  |
|                                | J01E Sulfonamides and trimethoprim         | 7 (9)                    |
|                                | J01F Macrolide, Lincosamide, Streptogramin | 14 (18)                  |
|                                | J01G Aminoglycoside                        | 2 (3)                    |
|                                | J01M Quinolone                             | 8 (11)                   |
|                                | J01X Other <sup>c</sup>                    | 21 (28)                  |
|                                | J01 Not specified                          | 2 (3)                    |

Totals for Age group, Geographic region, and Antibiotic class do not add up to total number of clinical trials (76) as some trials contributed to more than one sub group.

<sup>a</sup> 7 further trials mentioned inclusion of preterm babies in the inclusion criteria.

<sup>b</sup> Trial phase % based on percentage of interventional trials.

<sup>c</sup> J01X includes glycopeptides, polymixins, imidazole derivatives, and nitrofurantoin.

### Age group

On review of the age of participants being recruited, only 23 of the 76 trials (30%) were recruiting newborns (0 to 28 days). 1 of these 23 trials focused solely on recruiting preterm newborns (a further 7 CTs mentioned inclusion of preterm newborns in inclusion criteria). Of the remaining records, 52 (68%) were recruiting infants and toddlers (28 days to 23 months), 58 (76%) children (2

to 11 years), and 54 (71%) adolescents (11 up to 18 years). 29 (38%) trials did not focus solely on the recruitment of children or neonates, with age ranges also spanning across adult populations.

### Study type

Interventional trials were most frequently identified (n=66, 87%) with only 10 (13%) observational trials noted. Of the interventional trials, the majority were in the later stages of development; 10 (13%) in Phase 1, 1 (2%) between Phase 1 and 2, 9 (14%) in Phase 2, 3 (5%) between Phase 2 and 3, 10 (15%) in Phase 3 and 23 (35%) in Phase 4. Phase 4 is defined as CTs occurring after an antibiotic has been approved in children. In 10 (15%) of cases, a trial phase had not been specified.

### Sponsor and Endpoint Classification

Of the antibiotic clinical trials identified in our search, two-thirds (n=50, 66%) were sponsored by non-profit organisations (being University, Hospital or government funded), with many fewer trials sponsored by Industry (n=26, 34%). The endpoint classification of the majority of trials (n=43, 57%) was reported as efficacy (Table 2). A greater proportion (n=34, 68%) of non-profit studies measured the efficacy of the drugs as the primary endpoint, with less emphasis on collection of PK or safety data (n=16, 32%). In comparison pharmaceutical-led trials focussed on early PK and safety studies over the drug's efficacy (n=17, 65% vs. n=9, 35% respectively).

**Table 2.** Clinical trial endpoint classification of identified clinical trials stratified by trial sponsor. Endpoint classification determined by planned primary outcomes.

| Endpoint classification | Industry | Non-profit | Total (%) |
|-------------------------|----------|------------|-----------|
| Efficacy                | 9        | 34         | 43 (57)   |
| Safety                  | 10       | 2          | 12 (16)   |
| PK                      | 7        | 14         | 21 (28)   |

### Geographic region

Of the 76 antibiotic trials identified, the most frequently recruiting geographic region was North America (n=34, 45%). 22 (29%) trials recruiting in Europe and 16 (21%) in Asia were identified, 6 (8%) in Latin America, 8 (11%) in Africa, and 5 (7%) in Oceania. The great majority of trials were recruiting in High Income Countries (HICs) (n=54, 71%), with fewer trials recruiting in Low Income Countries (LICs) (n=4, 5%), Lower Middle Income Countries (LMICs) (n=4, 5%), Upper Middle Income Countries (UMICs) (n=11, 14%) or a combination of UMICs and HICs (n=3, 4%).



### Indication

The most common treatment indications investigated in the 76 antibiotic trials were Lower Respiratory Tract Infection (n=12, 16%) and Sepsis (n=11, 14%), followed by Upper Respiratory Tract Infection (n=8, 11%), Intra-abdominal Infection (IAI) (n=8, 11%), Urinary Tract Infection (UTI) (n=7, 9%), complicated Skin and Soft Tissue Infection (cSSTI) (n=6, 8%), CNS infection (n=3, 4%), and Bone and Joint infection (n=1, 1%) (Table 3). 18 (24%) trials were investigations of unspecified bacterial infections and these were mainly phase 1 PK studies.

### Antibiotic class

The majority of antibiotics (n=47, 62%) being investigated were beta-lactams, followed by other antibiotic classes (J01X, including vancomycin, telavancin and dalbavancin) (n=21, 28%). Macrolides or lincosamides (J01F) were the next most commonly studied antibiotic classes (n=14, 18%). Very few of the records reported investigations of tetracyclines (J01A) (n=4, 5%), Sulphonamides and trimethoprim (J01E) (n=7, 9%), aminoglycosides (J01G) (n=2, 3%), or quinolones (J01M) (n=8, 11%). 2 CTs (3%) did not specify the class of antibiotic being investigated. 16 (21%) trials were investigating more than one antibiotic; these trials counted towards more than one J01 category. The breakdown of J01 categories is described in Figure 1.

### Antibiotic pipeline

Of the 37 antibiotics listed on the most recent May 2016 edition of the Pew Charitable Trusts Antibiotic Pipeline (last accessed 10<sup>th</sup> June 2016),[13] as noted by the EMA Opinions and Decisions on Pediatric Investigation Plans, 5 had an agreed PIP: Imipenem/Cilastatin+Relebactam, Cadazolid, Carbavance (Meropenem+Vaborbactam), Eravacycline, and Solithromycin.[8] As of 8<sup>th</sup> November 2016, our search found that only 2 of the 37 antibiotics listed on the Pew antibiotic pipeline (Carbavance and Solithromycin) was being investigated in 1 and 2 on-going CTs in pediatric patients, respectively (Table 4). A PIP was agreed for Carbavance in 2015 for treatment of Gram-negative infections, and for Solithromycin in 2016 for the treatment of gonococcal infection, and later for treatment of anthrax, tularaemia, and bacterial pneumonia. PIPs were established in 2015 for treatment of urinary tract infection and complicated intra-abdominal infection with Eravacycline, and in 2016 for treatment of Clostridium difficile infection with Cadazolid and of Gram-negative bacterial infection with Imipenem/Cilastatin+Relebactam.[14] Despite this, we could not identify any registered trials of these antibiotics in our search.

**Table 3.** Clinical indication of identified clinical trials stratified by age group being recruited.

| Indication                        | Total (%) | Age group        |                       |                      |          |             |
|-----------------------------------|-----------|------------------|-----------------------|----------------------|----------|-------------|
|                                   |           | Preterm neonates | Neonates <sup>a</sup> | Infants and toddlers | Children | Adolescents |
| Unspecified Bacterial Infection   | 18 (24)   | -                | 11                    | 15                   | 15       | 14          |
| Lower Respiratory Tract Infection | 12 (16)   | 1                | 3                     | 12                   | 13       | 5           |
| Sepsis                            | 11 (14)   | -                | 6                     | 9                    | 9        | 11          |
| Upper Respiratory Tract           | 8 (11)    | -                | 1                     | 5                    | 9        | 7           |
| Intra-abdominal Infection         | 8 (11)    | -                | 3                     | 5                    | 5        | 7           |
| Urinary Tract Infection           | 7 (9)     | -                | 2                     | 6                    | 7        | 6           |
| Skin and Soft Tissue Infection    | 6 (8)     | -                | 3                     | 4                    | 4        | 8           |
| CNS infection                     | 3 (4)     | -                | 1                     | 4                    | 4        | 4           |
| Bone and Joint Infection          | 1 (1)     | -                | -                     | 1                    | 1        | 1           |
|                                   |           | 1                | 30                    | 61                   | 67       | 63          |

Age group totals do not add up to total number of clinical trials (76) as some trials contributed to more than one age group.

<sup>a</sup> refers to total number of preterm and term neonates.

**Table 4.** Comparison of antibiotic development pipeline in adults and children. Adapted from Pew Charitable Trusts “Antibiotics currently in clinical development” pipeline (last accessed October 2016).[13]

| Antibiotic   | Phase   | Manufacturer    | Indication                             | Drug development in Adults | Paediatric Investigation Plan for drug development in Children | Number of open clinical trials in children |
|--------------|---------|-----------------|----------------------------------------|----------------------------|----------------------------------------------------------------|--------------------------------------------|
| WCK 4873     | Phase 1 | Wockhardt Ltd.  | Bacterial infection                    | ✓                          | -                                                              | -                                          |
| MGB – BP – 3 | Phase 1 | MGB Pharma Ltd. | <i>Clostridium difficile</i> infection | ✓                          | -                                                              | -                                          |

|                       |         |                                                  |                                                                                     |   |   |   |
|-----------------------|---------|--------------------------------------------------|-------------------------------------------------------------------------------------|---|---|---|
| OP0595                | Phase 1 | Meiji Seika Pharma Co.<br>Fedora Pharmaceuticals | Bacterial infection                                                                 | ✓ | - | - |
| BAL30072              | Phase 1 | Basilea Pharmaceuticals                          | Multidrug resistant gram negatives                                                  | ✓ | - | - |
| CRS3123               | Phase 1 | Crestone Inc.                                    | <i>Clostridium difficile</i> infection                                              | ✓ | - | - |
| LCB01 – 0371          | Phase 1 | Legochem Biosciences<br>Inc.                     | Bacterial infection                                                                 | ✓ | - | - |
| TD – 1607             | Phase 1 | Theravance Biopharma<br>Inc.                     | Acute skin infection, HAP, VAP,<br>bacteraemia                                      | ✓ | - | - |
| WCK 2349              | Phase 1 | Wockhardt Ltd.                                   | Bacterial infection                                                                 | ✓ | - | - |
| WCK 771               | Phase 1 | Wockhardt Ltd.                                   | Bacterial infection                                                                 | ✓ | - | - |
| Zidebactam+Cefepime   | Phase 1 | Wockhardt Ltd.                                   | cUTI, HAP, VAP                                                                      | ✓ | - | - |
| TP – 271              | Phase 1 | Tetraphase<br>Pharmaceuticals Inc.               | CAP                                                                                 | ✓ | - | - |
| Aztreonam – Avibactam | Phase 2 | Astrazeneca PLC<br>Allergan PLC                  | cIAI                                                                                | ✓ | - | - |
| MRX – 1               | Phase 2 | MicuRx<br>Pharmaceuticals Inc.                   | Acute skin infection                                                                | ✓ | - | - |
| Debio 1450            | Phase 2 | Debiopharm<br>International SA                   | Acute skin infection, <i>Staphylococcus</i><br><i>spp.</i> associated osteomyelitis | ✓ | - | - |

|                       |         |                                   |                                                                                    |   |   |   |
|-----------------------|---------|-----------------------------------|------------------------------------------------------------------------------------|---|---|---|
| ETX0914               | Phase 2 | Entasis Therapeutics Inc.         | Uncomplicated gonorrhoea                                                           | ✓ | - | - |
| POL7080               | Phase 2 | Polyphor Ltd.                     | Pseudomonas spp. associated VAP, lower respiratory tract infection, bronchiectasis | ✓ | - | - |
| Brilacidin            | Phase 2 | Cellceutix Corporation            | Acute skin infection                                                               | ✓ | - | - |
| Ceftaroline+Avibactam | Phase 2 | AstraZeneca PLC<br>Allergan PLC   | Bacterial infection                                                                | ✓ | - | - |
| CG400549              | Phase 2 | Crystal Genomics Inc.             | Acute skin infection, osteomyelitis                                                | ✓ | - | - |
| Finafloxacin          | Phase 2 | MerLion Pharmaceuticals Pte Ltd.  | cUTI, cIAI, acute skin infection, pyelonephritis                                   | ✓ | - | - |
| Geptidacin            | Phase 2 | GlaxoSmithKline PLC               | cUTI, CAP, uncomplicated urogenital gonorrhoea                                     | ✓ | - | - |
| Nemonoxacin           | Phase 2 | TaiGen Biotechnology Co. Ltd.     | CAP, acute skin infection, diabetic foot                                           | ✓ | - | - |
| Ramoplanin            | Phase 2 | Nanotherapeutics Inc.             | Prevent recurrent <i>Clostridium difficile</i> infection                           | ✓ | - | - |
| Ridinilazole          | Phase 2 | Summet Therapeutics Inc.          | <i>Clostridium difficile</i>                                                       | ✓ | - | - |
| Zabofloxacin          | Phase 3 | Dong Wha Pharmaceuticals Co. Ltd. | CAP                                                                                | ✓ | - | - |
| S – 649266            | Phase 3 | Shionogi Inc.                     | HAP, VAP, cUTI, bloodstream infection                                              | ✓ | - | - |

|                                    |         |                               |                                                                                 |   |                |   |
|------------------------------------|---------|-------------------------------|---------------------------------------------------------------------------------|---|----------------|---|
| Omadacycline                       | Phase 3 | Paratek Pharmaceuticals Inc.  | CAP, cUTI, acute skin infection                                                 | ✓ | -              | - |
| Lefamulin                          | Phase 3 | Nabriva Therapeutics AC       | CAP, HAP, VAP, acute skin infection, osteomyelitis, prosthetic joint infections | ✓ | -              | - |
| Imipenem / Cilastatin+Relebactam   | Phase 3 | Merck & Co. Inc.              | cUTI, cIAI, HAP, VAP, acute pyelonephritis                                      | ✓ | ✓              | - |
| Iclaprim                           | Phase 3 | Motif Bio PLC                 | HAP, acute skin infection                                                       | ✓ | -              | - |
| Cadazolid                          | Phase 3 | Actelion Pharmaceuticals Ltd. | <i>Clostridium difficile</i>                                                    | ✓ | ✓              | - |
| Taksta (fusidic acid)              | Phase 3 | Cempra Inc.                   | Acute skin infection, prosthetic joint infection                                | ✓ | -              | - |
| Carbavance (Meropenem+Vaborbactam) | Phase 3 | Rempex Pharmaceuticals Inc.   | cUTI, cIAI, HAP, VAP, bacteraemia, pyelonephritis                               | ✓ | ✓              | 1 |
| Delafloxacin (Baxdela)             | Phase 3 | Melinta Therapeutics Inc.     | CAP, cUTI, acute skin infections <sup>a</sup>                                   | ✓ | Waiver granted | - |
| Eravacycline                       | Phase 3 | Tetraphase Pharma Inc.        | cIAI and cUTI                                                                   | ✓ | ✓              | - |
| Plazomicin                         | Phase 3 | Achaogen Inc.                 | cUTI, HAP, VAP, cIAI, catheter-associated bloodstream infection <sup>a</sup>    | ✓ | -              | - |
| Solithromycin                      | Phase 3 | Cempra Inc.                   | CAP, uncomplicated urogenital gonorrhoea, urethritis                            | ✓ | ✓              | 2 |

HAP, hospital-acquired pneumonia; VAP, ventilator-acquired pneumonia; cUTI, complicated Urinary Tract Infection; CAP, Community-acquired pneumonia; cIAI, complicated Intra-abdominal Infection.

<sup>a</sup> target carbapenem resistant enterobacteriaceae

## DISCUSSION

Our search on *ClinicalTrials.gov* identified 76 clinical trials investigating one or more antibiotics recruiting children between 0 and 18 years of age. This is low in comparison to the number of on-going trials in adults, with children representing around a quarter of the global population.[15,16] A review of completed CTs in the U.S. between 2000 and 2010 identified a total of 4078 adult trials compared to just 294 that had recruited children.[17] In our study, the lack of trials recruiting neonates is striking. Just 23 of the 76 trials identified were recruiting neonates, and remarkably just 8 CTs globally were recruiting preterm neonates. There are broadly two types of pediatric trials being conducted globally. Either pharmaceutical-led Phase 1/2 PK and safety trials (n=17) being conducted in the HIC setting, or investigator led, often pragmatic, late phase efficacy trials in the LMIC setting (n=34), with a greater proportion of the on-going trials sponsored by non-profit organisations than industry (66% compared to 34%). As of April 2016, there were 17 agreed antibiotic PIPs agreed by the EMA,[8] covering a range of indications, most commonly cSSTI, complicated IAI (cIAI), and complicated UTI (cUTI).[14] In contrast, treatments for respiratory and systemic infections, the most common indications in pediatrics, do not appear to currently being evaluated.[18] Although the introduction of PIPs on the whole has encouraged the study of medicines in children, the range of infectious indications covered therefore does not match the burden of disease in this age group. Thirty-seven antibiotics are currently being developed in adults, yet to our knowledge just 2 of these are being studied in children. However, some classes of antibiotics that may be of higher risk for children (tetracyclines and fluoroquinolones) may not be pursued as aggressively for pediatric approvals by either industry or regulatory agencies. The substantial lag time is a real concern, particularly for new antibiotics against resistant Gram-negative pathogens, although there is some value in generating substantial safety data in adults prior to exposing children and newborn infants to potentially toxic new agents. However, Gram-negative sepsis is a growing problem in neonates, with a significant increase in the proportion of multi-resistant Gram-negative pathogens.[19]

In 2013, a similar review of European pediatric clinical trials identified 31 trials of antibiotics approved by the EMA in 2000 that were recruiting children in Europe (compared to the 22 trials we found to be now recruiting in this region). They similarly found a very small proportion of neonatal trials (just 2 of 31), as well as a greater proportion of efficacy-based trials.[10] In 2012, a review of interventional trials registered with *ClinicalTrials.gov* between 2007 and 2010 found that only 17% had recruited children below 18 years of age.[20] A similar review of antimicrobial CTs conducted in the U.S. between 2000 and 2012 reported that just 5% had recruited only children compared to the 74% that had recruited only adults, and that, as we have found, the trials were sponsored primarily by non-profit organisations (60% compared to 30% by industry).[17] In our search of global trials, 39% of registered CTs reported collection of PK data in comparison to a similar review in 2009 of

1  
2  
3 PK research on medicines for children that reported 24% of registered CTs would be collecting PK  
4 data.[21] Collection of PK data is particularly important in neonates where developmental  
5 differences in physiology lead to significant changes in drug PK, which puts them at increased risk  
6 of adverse drug reactions.[3,22] Furthermore, off-label and unlicensed prescribing is at its greatest  
7 in neonatal populations (61% and 22% respectively)[14]. A recent review noted a striking lack of  
8 harmonisation in study design and outcomes among completed and on-going neonatal and pediatric  
9 antibiotic CTs which may make translation of trial data into clinical guidance more difficult.[23]  
10  
11

12  
13  
14  
15 The search strategy used has some limitations. Since the search was limited to clinical trials  
16 registered to *ClinicalTrials.gov*, it is possible that a number of open or on-going trials registered with  
17 alternative platforms (for example ICTRP) will have been missed. Together with *ClinicalTrials.gov*  
18 these could help to establish the entirety of current clinical research in this field. We did however  
19 search EudraCT, and found no further studies to those captured on *ClinicalTrials.gov*. Our search  
20 was also limited to open CTs, which means that active but not yet recruiting trials were not  
21 captured, as well as those that had closed to recruitment previously. The information recorded for  
22 each trial registered with *ClinicalTrials.gov* is updated by the trial investigators, and therefore relies  
23 on them to periodically update the registry. On occasion, information such as recruitment status  
24 might not be updated in real time.  
25  
26  
27  
28  
29  
30  
31

32 Concerns around the growing threat of antimicrobial resistance have prompted a number of new  
33 initiatives. In 2016, the EMA published the first draft of the Concept Paper to propose the  
34 development of an Addendum to the guideline on the evaluation of new anti-bacterial products for  
35 treatment of bacterial infections in children.[24] At the same time, the Clinical Trials Transformation  
36 Initiative (CTTI) is currently focused on the identification of key barriers in the conduct of pediatric  
37 antibacterial CTs, which hamper their successful implementation into clinical practice.[25] Recent  
38 evidence states that overall, antibiotic CTs make up less than 1% of all registered pediatric CTs,  
39 and that trial completion is slow, with an average time to completion of around two years.[26]  
40  
41  
42  
43  
44  
45  
46

## 47 CONCLUSIONS

48 A number of issues contribute to the difficulties in conducting pediatric antibiotic clinical trials. The  
49 lack of regulatory guidance, vulnerability of this population, issues with informed consent and  
50 assent, and lack of research-experienced hospital personnel all present challenges in study design,  
51 delivery and recruitment. Delays in the initial start-up of CTs in pediatrics due to pediatric-specific  
52 protocol issues and complicated ethical approval continue to discourage both academic and  
53 pharmaceutical interest. The limited data presented here suggests that the dismal state of ongoing  
54  
55  
56  
57  
58  
59  
60

1  
2  
3 pediatric antibiotic trials is still continuing. Earlier collaboration between academic research  
4 networks and pharmaceutical companies is now vital to accelerate progress.  
5  
6  
7

## 8 9 **ACKNOWLEDGEMENTS**

10 **Contributors** MS, CB, GT, LF and JB designed the study, GT and CB conducted the search, IL and  
11 JB commented on study design and assisted with drafting the paper.

12 **Funding** This research received no specific grant from any funding agency in the public,  
13 commercial or not-for-profit sectors.

14 **Conflict of interest** None declared.

15 **Data sharing statement** Dataset is available on request.  
16  
17  
18  
19  
20  
21  
22

## 23 **REFERENCES**

- 24 1. Corny J, Lebel D, Bailey B et al. Unlicensed and Off-Label Drug Use in Children Before and  
25 After Pediatric Governmental Initiatives. *J Pediatr Pharmacol Ther.* 2015;20(4):316–28.
- 26 2. European Medicines Agency. Concept paper on extrapolation of efficacy and safety in  
27 medicine development.  
28 [http://www.ema.europa.eu/docs/en\\_GB/document\\_library/Scientific\\_guideline/2013/04/WC5](http://www.ema.europa.eu/docs/en_GB/document_library/Scientific_guideline/2013/04/WC500142358.pdf)  
29 00142358.pdf. (accessed May 2016)
- 30 3. Kearns GL, Abdel-Rahman SM, Alander SW et al. Developmental pharmacology--drug  
31 disposition, action, and therapy in infants and children. *N Engl J Med.* 2003;349(12):1157–  
32 67.
- 33 4. Dunne J, Rodriguez WJ, Murphy MD et al. Extrapolation of Adult Data and Other Data in  
34 Pediatric Drug-Development Programs. *Pediatrics.* 2011;  
35 <http://pediatrics.aappublications.org/content/early/2011/10/20/peds.2010-3487.abstract>  
36 (accessed June 2016)
- 37 5. The World Health Organisation. WHO Promoting Safety of Medicines for Children. 2007;  
38 [http://www.who.int/medicines/publications/essentialmedicines/Promotion\\_safe\\_med\\_childre](http://www.who.int/medicines/publications/essentialmedicines/Promotion_safe_med_childre)  
39 ns.pdf (accessed October 2016)
- 40 6. van der Meer JW, Gyssens IC. Quality of antimicrobial drug prescription in hospital. *Clin*  
41 *Microbiol Infect.* 2001;7:12–5.
- 42 7. Theuretzbacher U, Van Bambeke F, Cantón R et al. Reviving old antibiotics. *Internet J*  
43 *Antimicrob Chemother.* 2015;  
44 <http://jac.oxfordjournals.org/content/early/2015/06/10/jac.dkv157.abstract> (accessed June  
45 2016)  
46  
47  
48  
49  
50  
51  
52  
53  
54  
55  
56  
57  
58  
59  
60



- 1  
2  
3 8. European Medicines Agency. EMA Opinions and decisions on Paediatric Investigation  
4 Plans. 2016;  
5 [http://www.ema.europa.eu/ema/index.jsp?curl=pages/medicines/landing/pip\\_search.jsp&mid=WC0b01ac058001d129](http://www.ema.europa.eu/ema/index.jsp?curl=pages/medicines/landing/pip_search.jsp&mid=WC0b01ac058001d129). (accessed June 2016)
- 6  
7  
8  
9 9. Guidance for industry. Pediatric Study Plans: Content of and Process for Submitting Initial  
10 Pediatric Study Plans and Amended Initial Pediatric Study Plans.  
11 <http://www.fda.gov/downloads/drugs/guidancecomplianceregulatoryinformation/guidances/ucm360507.pdf>. (accessed June 2016)
- 12  
13  
14  
15 10. Garazzino S, Lutsar I, Bertaina C et al. New antibiotics for paediatric use: a review of a  
16 decade of regulatory trials submitted to the European Medicines Agency from 2000--why  
17 aren't we doing better? *Int J Antimicrob Agents*. 2013;42(2):99–118.
- 18  
19  
20 11. The World Bank. The World Bank list of economies. 2015;  
21 <http://siteresources.worldbank.org/DATASTATISTICS/Resources/CLASS.XLS> (accessed  
22 October 2016)
- 23  
24 12. The World Health Organisation. WHO ATC/DDD Index. 2016;  
25 [http://www.whocc.no/atc\\_ddd\\_index/](http://www.whocc.no/atc_ddd_index/). (accessed March 2016)
- 26  
27 13. The Pew Charitable Trusts. Antibiotics Currently in Clinical Development. 2016;  
28 [http://www.pewtrusts.org/~media/assets/2016/05/antibiotics-currently-in-clinical-  
29 development.pdf?la=en](http://www.pewtrusts.org/~media/assets/2016/05/antibiotics-currently-in-clinical-development.pdf?la=en). (accessed May 2016)
- 30  
31  
32 14. Lutsar I. Often neglected: paediatric drug development - a regulatory and clinical view. In  
33 Amsterdam, Netherlands; 2016. (S219 - Symposium lecture.).
- 34  
35 15. Ceci A, Felisi M, Baiardi P et al. Medicines for children licensed by the European Medicines  
36 Agency (EMA): the balance after 10 years. *Eur J Clin Pharmacol*. 2006;62(11):947–52.
- 37  
38 16. Ruperto N, Eichler I, Herold R. A European Network of Paediatric Research at the European  
39 Medicines Agency (Enpr-EMA). *Arch Dis Child*. 2012;97:185–88.
- 40  
41 17. Stockmann C, Sherwin CMT, Ampofo K et al. Characteristics of antimicrobial studies  
42 registered in the USA through ClinicalTrials.Gov. *Int J Antimicrob Agents*. 2013;42(2):161–6.
- 43  
44 18. Versporten A, Bielicki J, Drapier N et al. The Worldwide Antibiotic Resistance and  
45 Prescribing in European Children (ARPEC) point prevalence survey: developing hospital-  
46 quality indicators of antibiotic prescribing for children. *J Antimicrob Chemother*.  
47 2016;71(4):1106–17.
- 48  
49 19. Bielicki JA, Lundin R, Sharland M. Antibiotic Resistance Prevalence in Routine Bloodstream  
50 Isolates from Children's Hospitals Varies Substantially from Adult Surveillance Data in  
51 Europe. *Pediatr Infect Dis J*. 2015;34(7):734–41.
- 52  
53 20. Califf RM, Zarin DA, Kramer JM et al. Characteristics of clinical trials registered in  
54 ClinicalTrials.gov, 2007-2010. *JAMA*. 2012;307(17):1838–47.
- 55  
56  
57  
58  
59  
60

- 1  
2  
3 21. Viergever RF, Rademaker CMA, Ghersi D. Pharmacokinetic research in children: an  
4 analysis of registered records of clinical trials. *BMJ Open*. 2011;1(1):e000221.  
5  
6 22. Roberts JK, Stockmann C, Constance JE et al. Pharmacokinetics and pharmacodynamics of  
7 antibacterials, antifungals, and antivirals used most frequently in neonates and infants. *Clin*  
8 *Pharmacokinet*. 2014;53(7):581–610.  
9  
10 23. Folgori L, Bielicki J, Ruiz B, et al. Harmonisation in study design and outcomes in paediatric  
11 antibiotic clinical trials: a systematic review. *Lancet Infect Dis*. 2016;16(9):e178-89.  
12  
13 24. European Medicines Agency. Concept paper on an addendum to the guideline on the  
14 evaluation of medicinal products indicated for treatment of bacterial infections to address  
15 paediatric-specific clinical data requirements.  
16 [http://www.ema.europa.eu/docs/en\\_GB/document\\_library/Scientific\\_guideline/2016/04/WC5](http://www.ema.europa.eu/docs/en_GB/document_library/Scientific_guideline/2016/04/WC500205026.pdf)  
17 [00205026.pdf](http://www.ema.europa.eu/docs/en_GB/document_library/Scientific_guideline/2016/04/WC500205026.pdf). (accessed July 2016)  
18  
19 25. Clinical Trials Transformation Initiative. [https://www.ctti-clinicaltrials.org/projects/pediatric-](https://www.ctti-clinicaltrials.org/projects/pediatric-trials)  
20 [trials](https://www.ctti-clinicaltrials.org/projects/pediatric-trials). (accessed July 2016)  
21  
22 26. Clinical Trials Transformation Initiative. AACT database. [https://www.ctti-](https://www.ctti-clinicaltrials.org/aact-database)  
23 [clinicaltrials.org/aact-database](https://www.ctti-clinicaltrials.org/aact-database). (accessed January 2017)  
24  
25  
26  
27  
28  
29  
30  
31  
32  
33  
34  
35  
36  
37  
38  
39  
40  
41  
42  
43  
44  
45  
46  
47  
48  
49  
50  
51  
52  
53  
54  
55  
56  
57  
58  
59  
60

1  
2  
3  
4  
5  
6  
7  
8  
9  
10  
11  
12  
13  
14  
15  
16  
17  
18  
19  
20  
21  
22  
23  
24  
25  
26  
27  
28  
29  
30  
31  
32  
33  
34  
35  
36  
37  
38  
39  
40  
41  
42  
43  
44  
45  
46  
47  
48  
49  
50  
51  
52  
53  
54  
55  
56  
57  
58  
59  
60

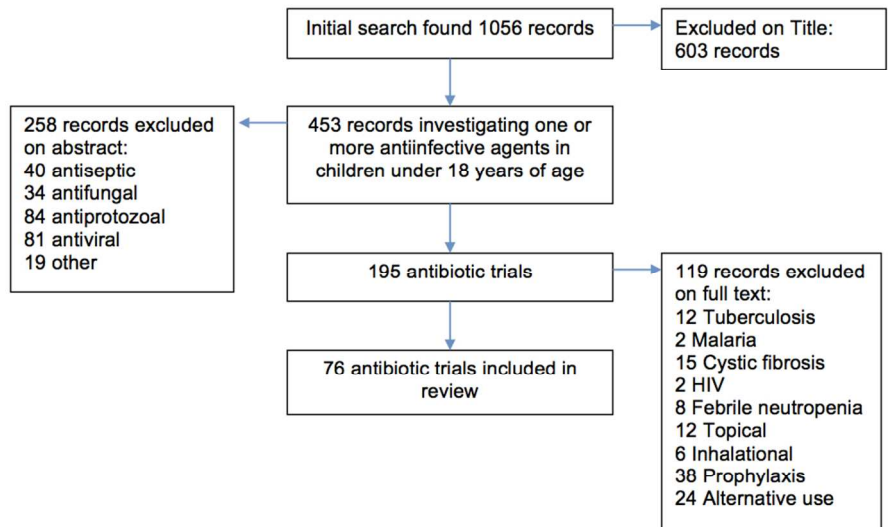

Figure 1. Flow chart. Clinical trial selection process.

195x118mm (150 x 150 DPI)

Review only

# BMJ Open

## A global shortage of neonatal and pediatric antibiotic trials: a narrative review.

|                                 |                                                                                                                                                                                                                                                                                                                                                                                                                                                                                                                                                                                                                                                                                                                                                                                                     |
|---------------------------------|-----------------------------------------------------------------------------------------------------------------------------------------------------------------------------------------------------------------------------------------------------------------------------------------------------------------------------------------------------------------------------------------------------------------------------------------------------------------------------------------------------------------------------------------------------------------------------------------------------------------------------------------------------------------------------------------------------------------------------------------------------------------------------------------------------|
| Journal:                        | <i>BMJ Open</i>                                                                                                                                                                                                                                                                                                                                                                                                                                                                                                                                                                                                                                                                                                                                                                                     |
| Manuscript ID                   | bmjopen-2017-016293.R1                                                                                                                                                                                                                                                                                                                                                                                                                                                                                                                                                                                                                                                                                                                                                                              |
| Article Type:                   | Research                                                                                                                                                                                                                                                                                                                                                                                                                                                                                                                                                                                                                                                                                                                                                                                            |
| Date Submitted by the Author:   | 09-Jun-2017                                                                                                                                                                                                                                                                                                                                                                                                                                                                                                                                                                                                                                                                                                                                                                                         |
| Complete List of Authors:       | Thompson, Georgina; St George's University of London, Infection and Immunity; University of Exeter Medical School<br>Barker, Charlotte; St George's University of London, Infection and Immunity; University College London Institute of Child Health<br>Folgori, Laura; St George's University of London, Paediatric Infectious Diseases Research Group<br>Bielicki, Julia; St George's University London, Division of Clinical Sciences; University of Basel Children's Hospital<br>Bradley, John; University of California San Diego School of Medicine, Department of Pediatrics<br>Lutsar, Irja; University of Tartu, Department of Medical Microbiology<br>sharland, mike; St George's University of London, Infection and Immunity; St Georges Hospital, Paediatric Infectious Diseases Unit |
| <b>Primary Subject Heading</b>: | Paediatrics                                                                                                                                                                                                                                                                                                                                                                                                                                                                                                                                                                                                                                                                                                                                                                                         |
| Secondary Subject Heading:      | Infectious diseases                                                                                                                                                                                                                                                                                                                                                                                                                                                                                                                                                                                                                                                                                                                                                                                 |
| Keywords:                       | Paediatric infectious disease & immunisation < PAEDIATRICS, INFECTIOUS DISEASES, PAEDIATRICS                                                                                                                                                                                                                                                                                                                                                                                                                                                                                                                                                                                                                                                                                                        |
|                                 |                                                                                                                                                                                                                                                                                                                                                                                                                                                                                                                                                                                                                                                                                                                                                                                                     |

SCHOLARONE™  
Manuscripts

# A global shortage of neonatal and pediatric antibiotic trials: a narrative review.

G. Thompson<sup>1,2</sup>, C. Barker<sup>1,3,4</sup>, L. Folgori<sup>1</sup>, J. Bielicki<sup>1,5</sup>, J. Bradley<sup>6,7</sup>, I. Lutsar<sup>8</sup>, M. Sharland<sup>1,4</sup>

<sup>1</sup>Paediatric Infectious Diseases Research Group, Institute for Infection and Immunity, St George's University of London, London, UK

<sup>2</sup>University of Exeter, Exeter, UK

<sup>3</sup>Inflammation, Infection and Rheumatology Section, UCL Great Ormond Street Institute of Child Health, 30 Guilford Street, London, UK

<sup>4</sup>St George's University Hospitals NHS Foundation Trust, Blackshaw Road, London, UK

<sup>5</sup>Paediatric Pharmacology and Pharmacometrics, University of Basel Children's Hospital, Basel, Switzerland

<sup>6</sup>Department of Pediatrics, School of Medicine, University of California San Diego, CA, United States

<sup>7</sup>Rady Children's Hospital San Diego, San Diego, CA, United States

<sup>8</sup>Department of Medical Microbiology, University of Tartu, Tartu, Estonia

## Corresponding author

Georgina Thompson

Paediatric Infectious Diseases Research Group

St George's, University of London

Jenner Wing, Level 2, Room 2.216F, Mail Point J2C

London SW17 0RE

Telephone: 07880325494

Email: gethoms@sgul.ac.uk

**Word count:** 2764

## ABSTRACT

**Objectives:** There have been few clinical trials (CTs) on antibiotics which inform neonatal and pediatric drug labelling. Consequently, the rate of unlicensed and off-label prescribing in pediatrics remains high. This remains a major concern, particularly in neonates. It is unclear whether the current pediatric antibiotic research pipeline is adequate to inform optimal drug dosing. Using ClinicalTrials.gov registry, this review aims to establish the current global status of antibiotic CTs in children up to 18 years of age.

**Results:** Only 76 registered open CTs of antibiotics in children were identified globally; 23 (30%) were recruiting newborns (only 8 (11%) included preterm neonates), 52 (68%) infants and toddlers, 58 (76%) children, and 54 (71%) adolescents. The majority of registered trials were late phase (10 (15%) Phase 3 and 23 (35%) Phase 4/pharmacovigilance). Two-thirds were sponsored by non-profit organisations, with few sponsored by pharmaceutical companies (50 (66%) vs. 26 (34%) respectively). A greater proportion of non-profit funded trials were efficacy-based strategic trials (n=34, 68%), in comparison to industry-led trials, which were most often focused on safety or pharmacokinetic data (n=17, 65%). Our search revealed that 2 of the 37 antibiotics listed on the May 2016 Pew Charitable Trusts antibiotic development pipeline, currently being studied in adults, appear to be recruiting in open pediatric CTs.

**Conclusions:** This review highlights that there are currently very few pediatric antibiotic CTs being conducted globally (especially in neonates). There is striking disparity noted between antibiotic drug development programmes involving adults and children.

### Strengths and limitations of this study

- A narrative literature review of registered clinical trials in children.
- Explicit reproducible methodology.
- Search strategy limited to ClinicalTrials.gov and EudraCT. Entirety of clinical research in this field might not have been captured.
- Search strategy also limited to open clinical trials. Active but not yet recruiting trials were not captured.

## INTRODUCTION

With the persistence of widespread unlicensed and off-label prescribing in pediatrics – as high as 11.4% and 46.5% respectively – the paucity of clinical research involving children that which is conducted to inform optimal drug dosing, licensing and labelling remains a problem.[1] For certain medicines, drug efficacy can be extrapolated from adult data provided that the pathology and drug exposure are the same, or sufficiently similar in children as in adults.[2,3] Advances in modelling and simulation mean smaller focussed studies can now be performed to help obtain regulatory

1  
2  
3 approval for most medicines, including antimicrobials.[4] Although differences in drug  
4 pharmacokinetics (PK) in neonates and children can lead to adverse reactions that are not seen in  
5 adult populations, these are very rare and extrapolation of safety data into the pediatric population  
6 can further reduce the need for complex study designs.[5] Suboptimal antibiotic dosing, including  
7 under- and over-dosing, can lead to toxicity, treatment failure, and may drive antimicrobial  
8 resistance by encouraging selection pressures on drug-resistant strains of bacteria.[6]  
9  
10  
11

12  
13 Since antibiotics are the most commonly prescribed medicines in children, it is important to improve  
14 our currently limited understanding of their PK profiles to help determine optimal drug dosing and  
15 ultimately to improve patient outcomes.[7] In the last decade several initiatives have been  
16 established to encourage pediatric medicines research, thus bridge the gap between adult and  
17 pediatric drug development plans. Such initiatives include the Pediatric Regulation (Pediatric  
18 Investigation Plans (PIPs), introduced by the European Medicines Agency (EMA),[8] and Pediatric  
19 Study Plans (PSPs), by the U.S. Food and Drug Administration (FDA).[9] Despite this, there remain  
20 limited advances in the development of antibiotics for this population.[10]  
21  
22  
23  
24  
25  
26

27 The global status of clinical research on antibiotics in pediatrics is currently unknown. Using  
28 registered records of clinical trials (CTs) on *ClinicalTrials.gov*, this review aims (i) to summarise the  
29 current global status of registered antibiotic research in children and neonates, and (ii) to stimulate  
30 discussion and collaboration among the relevant stakeholders on the neglect of antibiotic research  
31 in pediatrics.  
32  
33  
34

## 35 36 **METHODS**

### 37 **Data sources**

38 The *ClinicalTrials.gov* registry (last accessed 8<sup>th</sup> November 2016) is an international platform for the  
39 registration of CTs. It is a web-based registry, developed in 2000 by the National Institute of Health  
40 (NIH) and the FDA, to which trials from 50 states and 163 countries around the world are registered.  
41 All information provided for each trial is updated periodically by the trial's sponsoring organisation.  
42 The database has a specific child filter, which uses a key word paradigm to select all registered  
43 trials recruiting patients/participants up to 18 years of age.  
44  
45  
46  
47  
48  
49

50 We were not able to capture all studies being planned in neonates, infants, and children by  
51 pharmaceutical companies in compliance with legislation that mandates studies of any drugs under  
52 investigation in adults that may have clinical utility in children. Discussions between companies and  
53 regulatory agencies are confidential, limiting our ability to fully understand the impact of the PIPs  
54 and PSP's noted above on antimicrobial compounds under development.  
55  
56  
57  
58  
59  
60

### Study selection

Our records were identified using suitable key word searches, in which the final search terms were (antimicrobial\* OR antibiotic\* OR antiinfective agent\*) AND Child AND Open Studies. All identified trials were filtered manually using inclusion and exclusion criteria. Interventional and observational trials on antimicrobials recruiting children up to 18 years of age were considered eligible for inclusion. No specific temporal filter was applied since only open or ongoing clinical trials were of interest. The following records, which were not investigating one or more antibiotics, were excluded: trials of antiseptics, antifungals, antiprotozoals, antivirals, and pro- or pre- biotics. The following records, which were investigating an antibiotic were excluded: trials involving tuberculosis, malaria, cystic fibrosis, HIV, febrile neutropenic patients, topical or inhalational treatments, prophylactic antibiotics, or records investigating alternative use for antibiotics (for example as an anti-inflammatory agent).

The searches were conducted by GT. All eligible records were identified via manual filtering by GT CB, LF and MS, and any disagreements regarding inclusion and exclusion of records were resolved through discussion.

### Data extraction

The following information was collected from the included records: unique NCT number, recruitment status, study design, trial phase, study sponsor, age group and sex eligibility, clinical indication, geographic region of recruitment, antibiotic being investigated, and endpoint classification. Outcomes were categorised as safety, efficacy or PK. Economic setting (based on geographic region of recruitment) was classified using The World Bank classification, where Low Income Countries (LICs) are defined as those with \$1,025 or less gross national income per capita, Lower Middle Income Countries (LMICs) \$1,026 – 4,035, Upper Middle Income Countries (UMICs) \$4,036 – 12,475, and High Income Countries (HICs) \$12,476 or more.[11]

The specific class of antibiotic studied in each trial was identified and classified using the World Health Organisation (WHO) ATC/DDD index.[12] To investigate whether novel antibiotics are being studied in pediatric and neonatal populations (as well as in adults), the antibiotics currently studied in children were compared with the *Pew Charitable Trusts Antibiotics Currently in Clinical Development* pipeline, which identifies novel antibiotics currently under development for the U.S. market.[13]

### RESULTS

Our search identified 1056 records. 603 records were excluded on title because they were studies not involving an antimicrobial. 453 records were investigating one or more antimicrobials and



recruiting children below 18 years of age. Among the 195 trials investigating antibiotics, 76 fulfilled our inclusion and exclusion criteria and were included in the final analysis. Reasons for exclusion are summarised in Figure 1. Details of included studies can be found in Supplementary file 1.

All 76 CTs identified were open as of 8<sup>th</sup> November 2016, and 63 (83%) of these were recognised as recruiting participants on this date (Table 1). All trials stated recruitment of both male and female participants.

**Table 1.** Characteristics of clinical trials.

| Characteristic                 | Category                                   | Number of studies, n (%) |
|--------------------------------|--------------------------------------------|--------------------------|
| <b>Age group</b>               | Preterm neonates                           | 1 (1) <sup>a</sup>       |
|                                | Neonates (total)                           | 23 (30)                  |
|                                | Infants and toddlers                       | 52 (68)                  |
|                                | Children                                   | 58 (76)                  |
|                                | Adolescents                                | 54 (71)                  |
| <b>Recruitment status</b>      | Recruiting                                 | 63 (83)                  |
|                                | Not yet recruiting                         | 13 (17)                  |
| <b>Study design</b>            | Interventional                             | 66 (87)                  |
|                                | Observational                              | 10 (13)                  |
| <b>Trial phase<sup>b</sup></b> | Phase 1                                    | 10 (15)                  |
|                                | Phase 1-2                                  | 1 (2)                    |
|                                | Phase 2                                    | 9 (14)                   |
|                                | Phase 2-3                                  | 3 (5)                    |
|                                | Phase 3                                    | 10 (15)                  |
|                                | Phase 4                                    | 23 (39)                  |
|                                | Not specified                              | 10 (15)                  |
| <b>Sponsor</b>                 | Industry                                   | 26 (34)                  |
|                                | Non-profit                                 | 50 (66)                  |
| <b>Geographic region</b>       | Africa                                     | 8 (11)                   |
|                                | Asia                                       | 16 (21)                  |
|                                | Europe                                     | 22 (29)                  |
|                                | Latin America                              | 6 (8)                    |
|                                | North America                              | 34 (45)                  |
|                                | Oceania                                    | 5 (7)                    |
| <b>Antibiotic class</b>        | J01A Tetracycline                          | 4 (5)                    |
|                                | J01C Beta-lactam, Penicillin               | 25 (33)                  |
|                                | J01D Other Beta-lactam                     | 22 (29)                  |
|                                | J01E Sulfonamides and trimethoprim         | 7 (9)                    |
|                                | J01F Macrolide, Lincosamide, Streptogramin | 14 (18)                  |
|                                | J01G Aminoglycoside                        | 2 (3)                    |
|                                | J01M Quinolone                             | 8 (11)                   |
|                                | J01X Other antibiotic classes <sup>c</sup> | 21 (28)                  |
|                                | J01 Not specified                          | 2 (3)                    |

Totals for Age group, Geographic region, and Antibiotic class do not add up to total number of clinical trials (76) as some trials contributed to more than one sub group.

<sup>a</sup> 7 further trials mentioned inclusion of preterm babies in the inclusion criteria.

<sup>b</sup> Trial phase % based on percentage of interventional trials.

<sup>c</sup> J01X includes glycopeptides, polymyxins, imidazole derivatives, and nitrofurantoin

### Age group

Twenty three of the 76 trials (30%) were recruiting newborns (0 to 28 days). One of these 23 trials focused solely on recruiting preterm newborns (a further 7 CTs mentioned inclusion of preterm newborns in inclusion criteria). Of the remaining records, 52 (68%) were recruiting infants and toddlers (28 days to 23 months), 58 (76%) children (2 to 11 years), and 54 (71%) adolescents (11 up to 18 years). 29 (38%) trials did not focus solely on the recruitment of children or neonates, with age ranges also spanning across adult populations.

### Study type

Interventional trials were most frequently identified (n=66, 87%) with only 10 (13%) observational trials noted. Of the interventional trials, the majority were in the later stages of development; 10 (13%) in Phase 1, 1 (2%) between Phase 1 and 2, 9 (14%) in Phase 2, 3 (5%) between Phase 2 and 3, 10 (15%) in Phase 3 and 23 (35%) in Phase 4. In 10 (15%) cases, a trial phase had not been specified.

### Sponsor and Endpoint Classification

Fifty (66%) trials were sponsored by non-profit organisations (being university, hospital or government funded), and 26 sponsored by industry (34%). The endpoint classification of the majority of trials (n=43, 57%) was reported as efficacy (Table 2). A greater proportion (n=34, 68%) of non-profit studies measured the efficacy of the drugs as the primary endpoint, with less emphasis on collection of PK or safety data (n=16, 32%). In comparison pharmaceutical-led trials focussed on early PK and safety studies over the drug's efficacy (n=17, 65% vs. n=9, 35% respectively).

**Table 2.** Clinical trial endpoint classification of identified clinical trials stratified by trial sponsor. Endpoint classification determined by planned primary outcomes.

| Endpoint classification | Industry | Non-profit | Total (%) |
|-------------------------|----------|------------|-----------|
| Efficacy                | 9        | 34         | 43 (57)   |
| Safety                  | 10       | 2          | 12 (16)   |
| PK                      | 7        | 14         | 21 (28)   |

### Geographic region

The most frequently recruiting geographic region was North America (n=34, 45%). 22 (29%) trials recruiting in Europe and 16 (21%) in Asia were identified, 6 (8%) in Latin America, 8 (11%) in Africa, and 5 (7%) in Oceania. Most trials were recruiting in HICs (n=54, 71%), with fewer trials recruiting in

LICs (n=4, 5%), LMICs (n=4, 5%), UMICs (n=11, 14%) or a combination of UMICs and HICs (n=3, 4%).

### Indication

The most common treatment indications investigated were Lower Respiratory Tract Infection (n=12, 16%) and Sepsis (n=11, 14%), followed by Upper Respiratory Tract Infection (n=8, 11%), Intra-abdominal Infection (IAI) (n=8, 11%), Urinary Tract Infection (UTI) (n=7, 9%), complicated Skin and Soft Tissue Infection (cSSTI) (n=6, 8%), CNS infection (n=3, 4%), and Bone and Joint infection (n=1, 1%) (Table 3).

### Antibiotic class

The majority of antibiotics (n=47, 62%) being investigated were beta-lactams, followed by other antibiotic classes (J01X, including vancomycin, telavancin and dalbavancin) (n=21, 28%). Macrolides or lincosamides (J01F) were the next most commonly studied antibiotic classes (n=14, 18%). Very few of the records reported investigations of tetracyclines (J01A) (n=4, 5%), Sulphonamides and trimethoprim (J01E) (n=7, 9%), aminoglycosides (J01G) (n=2, 3%), or quinolones (J01M) (n=8, 11%). 2 CTs (3%) did not specify the class of antibiotic being investigated. 16 (21%) trials were investigating more than one antibiotic; these trials counted towards more than one J01 category. The breakdown of J01 categories, as per WHO ATC/DDD classification,[12] is described in Table 1.

### Antibiotic pipeline

Of the 37 antibiotics listed on the most recent May 2016 edition of the Pew Charitable Trusts Antibiotic Pipeline (last accessed 10<sup>th</sup> June 2016),[13] as noted by the EMA Opinions and Decisions on Pediatric Investigation Plans, 5 had an agreed PIP: Imipenem/Cilastatin+Relebactam, Cadazolid, Carbavance (Meropenem+Vaborbactam), Eravacycline, and Solithromycin.[8] As of 8<sup>th</sup> November 2016, our search found that only 2 of the 37 antibiotics listed on the Pew antibiotic pipeline (Carbavance and Solithromycin) was being investigated in 1 and 2 on-going CTs in pediatric patients, respectively (Table 4). A PIP was agreed for Carbavance in 2015 for treatment of Gram-negative infections, and for Solithromycin in 2016 for the treatment of gonococcal infection, and later for treatment of anthrax, tularaemia, and bacterial pneumonia. PIPs were agreed in 2015 for treatment of urinary tract infection and complicated intra-abdominal infection with Eravacycline, and in 2016 for treatment of Clostridium difficile infection with Cadazolid and of Gram-negative bacterial infection with Imipenem/Cilastatin+Relebactam.[14] Despite this, we could not identify any registered trials of these antibiotics in our search.

**Table 3.** Clinical indication of identified clinical trials stratified by age group being recruited.

| Indication                        | Total (%) | Age group        |                       |                      |          |             |
|-----------------------------------|-----------|------------------|-----------------------|----------------------|----------|-------------|
|                                   |           | Preterm neonates | Neonates <sup>a</sup> | Infants and toddlers | Children | Adolescents |
| Unspecified Bacterial Infection   | 18 (24)   | -                | 11                    | 15                   | 15       | 14          |
| Lower Respiratory Tract Infection | 12 (16)   | 1                | 3                     | 12                   | 13       | 5           |
| Sepsis                            | 11 (14)   | -                | 6                     | 9                    | 9        | 11          |
| Upper Respiratory Tract           | 8 (11)    | -                | 1                     | 5                    | 9        | 7           |
| Intra-abdominal Infection         | 8 (11)    | -                | 3                     | 5                    | 5        | 7           |
| Urinary Tract Infection           | 7 (9)     | -                | 2                     | 6                    | 7        | 6           |
| Skin and Soft Tissue Infection    | 6 (8)     | -                | 3                     | 4                    | 4        | 8           |
| CNS infection                     | 3 (4)     | -                | 1                     | 4                    | 4        | 4           |
| Bone and Joint Infection          | 1 (1)     | -                | -                     | 1                    | 1        | 1           |
|                                   |           | 1                | 30                    | 61                   | 67       | 63          |

Age group totals do not add up to total number of clinical trials (76) as some trials contributed to more than one age group.

<sup>a</sup> refers to total number of preterm and term neonates.

**Table 4.** Comparison of antibiotic development pipeline in adults and children. Adapted from Pew Charitable Trusts “Antibiotics currently in clinical development” pipeline (last accessed October 2016).[13]

| Antibiotic   | Phase   | Manufacturer    | Indication                             | Drug development in Adults | Paediatric Investigation Plan for drug development in Children | Number of open clinical trials in children |
|--------------|---------|-----------------|----------------------------------------|----------------------------|----------------------------------------------------------------|--------------------------------------------|
| WCK 4873     | Phase 1 | Wockhardt Ltd.  | Bacterial infection                    | ✓                          | -                                                              | -                                          |
| MGB – BP – 3 | Phase 1 | MGB Pharma Ltd. | <i>Clostridium difficile</i> infection | ✓                          | -                                                              | -                                          |

|                       |         |                                                  |                                             |   |   |   |
|-----------------------|---------|--------------------------------------------------|---------------------------------------------|---|---|---|
| OP0595                | Phase 1 | Meiji Seika Pharma Co.<br>Fedora Pharmaceuticals | Bacterial infection                         | ✓ | - | - |
| BAL30072              | Phase 1 | Basilea Pharmaceuticals                          | Multidrug resistant gram negatives          | ✓ | - | - |
| CRS3123               | Phase 1 | Crestone Inc.                                    | <i>Clostridium difficile</i> infection      | ✓ | - | - |
| LCB01 – 0371          | Phase 1 | Legochem Biosciences Inc.                        | Bacterial infection                         | ✓ | - | - |
| TD – 1607             | Phase 1 | Theravance Biopharma Inc.                        | Acute skin infection, HAP, VAP, bacteraemia | ✓ | - | - |
| WCK 2349              | Phase 1 | Wockhardt Ltd.                                   | Bacterial infection                         | ✓ | - | - |
| WCK 771               | Phase 1 | Wockhardt Ltd.                                   | Bacterial infection                         | ✓ | - | - |
| Zidebactam+Cefepime   | Phase 1 | Wockhardt Ltd.                                   | cUTI, HAP, VAP                              | ✓ | - | - |
| TP – 271              | Phase 1 | Tetraphase Pharmaceuticals Inc.                  | CAP                                         | ✓ | - | - |
| Aztreonam – Avibactam | Phase 2 | Astrazeneca PLC<br>Allergan PLC                  | cIAI                                        | ✓ | - | - |
| MRX – 1               | Phase 2 | MicuRx Pharmaceuticals Inc.                      | Acute skin infection (systemic)             | ✓ | - | - |

|                                                                                                                                                                                                                                                                                           |            |                                  |                                                                                    |                                                                    |   |   |   |
|-------------------------------------------------------------------------------------------------------------------------------------------------------------------------------------------------------------------------------------------------------------------------------------------|------------|----------------------------------|------------------------------------------------------------------------------------|--------------------------------------------------------------------|---|---|---|
| 1<br>2<br>3<br>4<br>5<br>6<br>7<br>8<br>9<br>10<br>11<br>12<br>13<br>14<br>15<br>16<br>17<br>18<br>19<br>20<br>21<br>22<br>23<br>24<br>25<br>26<br>27<br>28<br>29<br>30<br>31<br>32<br>33<br>34<br>35<br>36<br>37<br>38<br>39<br>40<br>41<br>42<br>43<br>44<br>45<br>46<br>47<br>48<br>49 | Debio 1450 | Phase 2                          | Debiopharm International SA                                                        | Acute skin infection, Staphylococcus spp. associated osteomyelitis | ✓ | - | - |
| ETX0914                                                                                                                                                                                                                                                                                   | Phase 2    | Entasis Therapeutics Inc.        | Uncomplicated gonorrhoea                                                           | ✓                                                                  | - | - |   |
| POL7080                                                                                                                                                                                                                                                                                   | Phase 2    | Polyphor Ltd.                    | Pseudomonas spp. associated VAP, lower respiratory tract infection, bronchiectasis | ✓                                                                  | - | - |   |
| Brilacidin                                                                                                                                                                                                                                                                                | Phase 2    | Cellceutix Corporation           | Acute skin infection (systemic)                                                    | ✓                                                                  | - | - |   |
| Ceftaroline+Avibactam                                                                                                                                                                                                                                                                     | Phase 2    | AstraZeneca PLC<br>Allergan PLC  | Bacterial infection                                                                | ✓                                                                  | - | - |   |
| CG400549                                                                                                                                                                                                                                                                                  | Phase 2    | Crystal Genomics Inc.            | Acute skin infection, osteomyelitis                                                | ✓                                                                  | - | - |   |
| Finafloxacin                                                                                                                                                                                                                                                                              | Phase 2    | MerLion Pharmaceuticals Pte Ltd. | cUTI, cIAI, acute skin infection, pyelonephritis                                   | ✓                                                                  | - | - |   |
| Geptidacin                                                                                                                                                                                                                                                                                | Phase 2    | GlaxoSmithKline PLC              | cUTI, CAP, uncomplicated urogenital gonorrhoea                                     | ✓                                                                  | - | - |   |
| Nemonoxacin                                                                                                                                                                                                                                                                               | Phase 2    | TaiGen Biotechnology Co. Ltd.    | CAP, acute skin infection, diabetic foot                                           | ✓                                                                  | - | - |   |
| Ramoplanin                                                                                                                                                                                                                                                                                | Phase 2    | Nanotherapeutics Inc.            | Prevent recurrent Clostridium difficile infection                                  | ✓                                                                  | - | - |   |
| Ridinilazole                                                                                                                                                                                                                                                                              | Phase 2    | Summet Therapeutics Inc.         | Clostridium difficile                                                              | ✓                                                                  | - | - |   |

|                                    |         |                                   |                                                                                           |   |                |   |
|------------------------------------|---------|-----------------------------------|-------------------------------------------------------------------------------------------|---|----------------|---|
| Zabofloxacin                       | Phase 3 | Dong Wha Pharmaceuticals Co. Ltd. | CAP                                                                                       | ✓ | -              | - |
| S – 649266                         | Phase 3 | Shionogi Inc.                     | HAP, VAP, cUTI, bloodstream infection                                                     | ✓ | -              | - |
| Omadacycline                       | Phase 3 | Paratek Pharmaceuticals Inc.      | CAP, cUTI, acute skin infection                                                           | ✓ | -              | - |
| Lefamulin                          | Phase 3 | Nabriva Therapeutics AC           | CAP, HAP, VAP, acute skin infection, osteomyelitis, prosthetic joint infections           | ✓ | -              | - |
| Imipenem / Cilastatin+Relebactam   | Phase 3 | Merck & Co. Inc.                  | cUTI, cIAI, HAP, VAP, acute pyelonephritis                                                | ✓ | ✓              | - |
| Iclaprim                           | Phase 3 | Motif Bio PLC                     | HAP, acute skin infection                                                                 | ✓ | -              | - |
| Cadazolid                          | Phase 3 | Actelion Pharmaceuticals Ltd.     | <i>Clostridium difficile</i>                                                              | ✓ | ✓              | - |
| Taksta (fusidic acid)              | Phase 3 | Cempra Inc.                       | Acute skin infection, prosthetic joint infection                                          | ✓ | -              | - |
| Carbavance (Meropenem+Vaborbactam) | Phase 3 | Rempex Pharmaceuticals Inc.       | cUTI, cIAI, HAP, VAP, febrile neutropenia, bacteraemia, acute pyelonephritis <sup>a</sup> | ✓ | ✓              | 1 |
| Delafloxacin (Baxdela)             | Phase 3 | Melinta Therapeutics Inc.         | Acute skin infections, CAP, cUTI                                                          | ✓ | Waiver granted | - |
| Eravacycline                       | Phase 3 | Tetraphase Pharma Inc.            | cIAI and cUTI                                                                             | ✓ | ✓              | - |
| Plazomicin                         | Phase 3 | Achaogen Inc.                     | cUTI, HAP, VAP, cIAI, catheter-associated bloodstream infection <sup>a</sup>              | ✓ | -              | - |

|               |         |             |                                                      |   |   |   |
|---------------|---------|-------------|------------------------------------------------------|---|---|---|
| Solithromycin | Phase 3 | Cempra Inc. | CAP, uncomplicated urogenital gonorrhoea, urethritis | ✓ | ✓ | 2 |
|---------------|---------|-------------|------------------------------------------------------|---|---|---|

HAP, hospital-acquired pneumonia; VAP, ventilator-acquired pneumonia; cUTI, complicated Urinary Tract Infection; CAP, Community-acquired pneumonia; cIAI, complicated Intra-abdominal Infection.

<sup>a</sup> target carbapenem resistant enterobacteriaceae

For peer review only



## DISCUSSION

Our search on *ClinicalTrials.gov* identified 76 clinical trials investigating one or more antibiotics recruiting children between 0 and 18 years of age. This is low in comparison to the number of on-going trials in adults, with children representing around a quarter of the global population.[15,16] A review of completed CTs in the U.S. between 2000 and 2010 identified a total of 4078 adult trials compared to just 294 that had recruited children.[17] In our study, the lack of trials recruiting neonates is striking. Just 23 of the 76 trials identified were recruiting neonates, and remarkably just 8 CTs globally were recruiting preterm neonates. There are broadly two types of pediatric trials being conducted globally. Either pharmaceutical-led Phase 1/2 PK and safety trials (n=17) being conducted in the HIC setting, or investigator led, often pragmatic, late phase efficacy trials in the LMIC setting (n=34), with a greater proportion of the on-going trials sponsored by non-profit organisations than industry (66% compared to 34%). The rarity of bacterial infections in children, and the ethical and practical barriers to running paediatric trials likely act as deterrents to pharmaceutical interest, resulting in academic investigators focusing on the larger efficacy trials. As of April 2016, there were 17 antibiotic PIPs agreed by the EMA,[8] covering a range of indications, most commonly cSSTI, complicated IAI (cIAI), and complicated UTI (cUTI).[14] In contrast, treatments for respiratory and systemic infections, the most common indications in pediatrics, are not currently being evaluated.[18] Although the introduction of PIPs on the whole has encouraged the study of medicines in children, the range of infectious indications covered therefore does not match the burden of disease in this age group. Thirty-seven antibiotics are currently being developed in adults, yet to our knowledge just 2 of these are being studied in children. However, some classes of antibiotics that may be of higher risk for children (tetracyclines and fluoroquinolones) may not be pursued as aggressively for pediatric approvals by either industry or regulatory agencies due to well-recognized issues of toxicity, particularly relevant in situations for which safer alternative therapy is widely available. The substantial lag time between the submission date (for PIP or waiver) and declared date of completion of PK studies in adults is a real concern, particularly for new antibiotics against resistant Gram-negative pathogens, although there is some value in generating substantial safety data in adults prior to exposing children and newborn infants to potentially toxic new agents. However, Gram-negative sepsis is a growing problem in neonates, with a significant increase in the proportion of multi-resistant Gram-negative pathogens.[19]

In 2013, a similar review of European pediatric clinical trials identified 31 trials of antibiotics approved for adults by the EMA in 2000 that were recruiting children in Europe (compared to the 22 trials we found to be now recruiting in this region). They included both published and ongoing trials, which likely accounts for the higher number of trials reported. They similarly found a very small proportion of neonatal trials (just 2 of 31), as well as a greater proportion of efficacy-based trials.[10] In 2012, a review of interventional trials registered with *ClinicalTrials.gov* between 2007 and 2010

1  
2  
3 found that only 17% had recruited children below 18 years of age.[20] A similar review of  
4 antimicrobial CTs conducted in the U.S. between 2000 and 2012 reported that just 5% had recruited  
5 only children compared to the 74% that had recruited only adults, and that, as we have found, the  
6 trials were sponsored primarily by non-profit organisations (60% compared to 30% by industry).[17]  
7 In our search of global trials, 39% of registered CTs reported collection of PK data in comparison to  
8 a similar review in 2009 of PK research on medicines for children that reported 24% of registered  
9 CTs would be collecting PK data.[21] Collection of PK data is particularly important in neonates  
10 where developmental differences in physiology lead to significant changes in drug PK, which puts  
11 them at increased risk of adverse drug reactions.[3,22] Furthermore, off-label and unlicensed  
12 prescribing is at its greatest in neonatal populations (61% and 22% respectively)[14]. A recent  
13 review noted a striking lack of harmonisation in study design and outcomes among completed and  
14 on-going neonatal and pediatric antibiotic CTs which may make translation of trial data into clinical  
15 guidance more difficult.[23]

16  
17  
18  
19  
20  
21  
22  
23  
24 The search strategy used has some limitations. Since the search was limited to clinical trials  
25 registered to *ClinicalTrials.gov*, it is possible that a number of open or on-going trials registered with  
26 alternative platforms (for example, the WHO International Clinical Trials Registry Platform [ICTRP])  
27 will have been missed. Together with *ClinicalTrials.gov* these could help to establish the entirety of  
28 current clinical research in this field. We did however search EudraCT, and found no further studies  
29 to those captured on *ClinicalTrials.gov*. Our search was also limited to open CTs, which means that  
30 active but not yet recruiting trials were not captured, as well as those that had closed to recruitment  
31 previously. The information recorded for each trial registered with *ClinicalTrials.gov* is updated by  
32 the trial investigators, and therefore relies on them to periodically update the registry. On occasion,  
33 information such as recruitment status might not be updated in real time.

34  
35  
36  
37  
38  
39  
40  
41 Concerns around the growing threat of antimicrobial resistance have prompted a number of new  
42 initiatives. In 2016, the EMA published the first draft of the Concept Paper to propose the  
43 development of an Addendum to the guideline on the evaluation of new anti-bacterial products for  
44 treatment of bacterial infections in children.[24] At the same time, the Clinical Trials Transformation  
45 Initiative (CTTI) is currently focused on the identification of key barriers in the conduct of pediatric  
46 antibacterial CTs, which hamper their successful implementation into clinical practice.[25] Recent  
47 evidence states that overall, antibiotic CTs make up less than 1% of all registered pediatric CTs,  
48 and that trial completion is slow, with an average time to completion of around two years.[26] There  
49 are a number of specific areas where there is potential for harmonisation and simplification in the  
50 design and conduct of paediatric antibiotic CTs. Standardisation of the inclusion and exclusion  
51 criteria for specific Clinical Infection Syndromes, and an improved bridging of safety and efficacy  
52  
53  
54  
55  
56  
57  
58  
59  
60

1  
2  
3 data from other age groups, would allow improved comparison between studies, and potentially  
4 more simplified design of CTs, both of which will improve their conduct and efficiency in children.  
5  
6  
7

## 8 9 **CONCLUSIONS**

10 A number of issues contribute to the difficulties in conducting pediatric antibiotic clinical trials. The  
11 lack of regulatory guidance, vulnerability of this population, issues with informed consent and  
12 assent, and lack of research-experienced hospital personnel all present challenges in study design,  
13 delivery and recruitment. Delays in the initial start-up of CTs in pediatrics due to pediatric-specific  
14 protocol issues and complicated ethical approval continue to discourage both academic and  
15 pharmaceutical interest. The limited data presented here suggests that the dismal state of ongoing  
16 pediatric antibiotic trials is still continuing. Earlier collaboration between academic research  
17 networks and pharmaceutical companies is now vital to accelerate progress.  
18  
19  
20  
21  
22  
23  
24  
25

## 26 **ACKNOWLEDGEMENTS**

27 **Contributors** MS, CB, GT, LF and JB designed the study, GT conducted the search, IL and JB  
28 commented on study design and assisted with drafting the paper.

29 **Funding** This research received no specific grant from any funding agency in the public,  
30 commercial or not-for-profit sectors.

31 **Conflict of interest** None declared.

32 **Data sharing statement** Full dataset is available on request.  
33  
34  
35  
36  
37  
38  
39

## 40 **REFERENCES**

- 41 1. Corny J, Lebel D, Bailey B et al. Unlicensed and Off-Label Drug Use in Children Before and  
42 After Pediatric Governmental Initiatives. *J Pediatr Pharmacol Ther.* 2015;20(4):316–28.
- 43 2. European Medicines Agency. Concept paper on extrapolation of efficacy and safety in  
44 medicine development.  
45 [http://www.ema.europa.eu/docs/en\\_GB/document\\_library/Scientific\\_guideline/2013/04/WC5](http://www.ema.europa.eu/docs/en_GB/document_library/Scientific_guideline/2013/04/WC500142358.pdf)  
46 00142358.pdf. (accessed May 2016)
- 47 3. Kearns GL, Abdel-Rahman SM, Alander SW et al. Developmental pharmacology--drug  
48 disposition, action, and therapy in infants and children. *N Engl J Med.* 2003;349(12):1157–  
49 67.
- 50 4. Dunne J, Rodriguez WJ, Murphy MD et al. Extrapolation of Adult Data and Other Data in  
51 Pediatric Drug-Development Programs. *Pediatrics.* 2011;  
52  
53  
54  
55  
56  
57  
58  
59  
60

- 1  
2  
3 <http://pediatrics.aappublications.org/content/early/2011/10/20/peds.2010-3487.abstract>  
4 (accessed June 2016)  
5  
6 5. The World Health Organisation. WHO Promoting Safety of Medicines for Children. 2007;  
7 [http://www.who.int/medicines/publications/essentialmedicines/Promotion\\_safe\\_med\\_childre](http://www.who.int/medicines/publications/essentialmedicines/Promotion_safe_med_childre)  
8 [ns.pdf](#) (accessed October 2016)  
9  
10 6. Theuretzbacher U, Van Bambeke F, Cantón R et al. Reviving old antibiotics. *Internet J*  
11 *Antimicrob Chemother.* 2015;  
12 <http://jac.oxfordjournals.org/content/early/2015/06/10/jac.dkv157.abstract> (accessed June  
13 2016)  
14  
15 7. van der Meer JW, Gyssens IC. Quality of antimicrobial drug prescription in hospital. *Clin*  
16 *Microbiol Infect.* 2001;7:12–5.  
17  
18 8. European Medicines Agency. EMA Opinions and decisions on Paediatric Investigation  
19 Plans. 2016;  
20 [http://www.ema.europa.eu/ema/index.jsp?curl=pages/medicines/landing/pip\\_search.jsp&mid](http://www.ema.europa.eu/ema/index.jsp?curl=pages/medicines/landing/pip_search.jsp&mid)  
21 [=WC0b01ac058001d129.](#) (accessed June 2016)  
22  
23 9. Guidance for industry. Pediatric Study Plans: Content of and Process for Submitting Initial  
24 Pediatric Study Plans and Amended Initial Pediatric Study Plans.  
25 <http://www.fda.gov/downloads/drugs/guidancecomplianceregulatoryinformation/guidances/u>  
26 [cm360507.pdf.](#) (accessed June 2016)  
27  
28 10. Garazzino S, Lutsar I, Bertaina C et al. New antibiotics for paediatric use: a review of a  
29 decade of regulatory trials submitted to the European Medicines Agency from 2000--why  
30 aren't we doing better? *Int J Antimicrob Agents.* 2013;42(2):99–118.  
31  
32 11. The World Bank. The World Bank list of economies. 2015;  
33 <http://siteresources.worldbank.org/DATASTATISTICS/Resources/CLASS.XLS> (accessed  
34 October 2016)  
35  
36 12. The World Health Organisation. WHO ATC/DDD Index. 2016;  
37 [http://www.whocc.no/atc\\_ddd\\_index/.](http://www.whocc.no/atc_ddd_index/) (accessed March 2016)  
38  
39 13. The Pew Charitable Trusts. Antibiotics Currently in Clinical Development. 2016;  
40 [http://www.pewtrusts.org/~media/assets/2016/05/antibiotics-currently-in-clinical-](http://www.pewtrusts.org/~media/assets/2016/05/antibiotics-currently-in-clinical)  
41 [development.pdf?la=en.](#) (accessed May 2016)  
42  
43 14. Lutsar I. Often neglected: paediatric drug development - a regulatory and clinical view. In  
44 Amsterdam, Netherlands; 2016. (S219 - Symposium lecture.).  
45  
46 15. Ceci A, Felisi M, Baiardi P et al. Medicines for children licensed by the European Medicines  
47 Agency (EMA): the balance after 10 years. *Eur J Clin Pharmacol.* 2006;62(11):947–52.  
48  
49 16. Ruperto N, Eichler I, Herold R. A European Network of Paediatric Research at the European  
50 Medicines Agency (Enpr-EMA). *Arch Dis Child.* 2012;97:185–88.  
51  
52  
53  
54  
55  
56  
57  
58  
59  
60

17. Stockmann C, Sherwin CMT, Ampofo K et al. Characteristics of antimicrobial studies registered in the USA through ClinicalTrials.Gov. *Int J Antimicrob Agents*. 2013;42(2):161–6.
18. Versporten A, Bielicki J, Drapier N et al. The Worldwide Antibiotic Resistance and Prescribing in European Children (ARPEC) point prevalence survey: developing hospital-quality indicators of antibiotic prescribing for children. *J Antimicrob Chemother*. 2016;71(4):1106–17.
19. Bielicki JA, Lundin R, Sharland M. Antibiotic Resistance Prevalence in Routine Bloodstream Isolates from Children’s Hospitals Varies Substantially from Adult Surveillance Data in Europe. *Pediatr Infect Dis J*. 2015;34(7):734–41.
20. Califf RM, Zarin DA, Kramer JM et al. Characteristics of clinical trials registered in ClinicalTrials.gov, 2007-2010. *JAMA*. 2012;307(17):1838–47.
21. Viergever RF, Rademaker CMA, Ghersi D. Pharmacokinetic research in children: an analysis of registered records of clinical trials. *BMJ Open*. 2011;1(1):e000221.
22. Roberts JK, Stockmann C, Constance JE et al. Pharmacokinetics and pharmacodynamics of antibacterials, antifungals, and antivirals used most frequently in neonates and infants. *Clin Pharmacokinet*. 2014;53(7):581–610.
23. Folgori L, Bielicki J, Ruiz B, et al. Harmonisation in study design and outcomes in paediatric antibiotic clinical trials: a systematic review. *Lancet Infect Dis*. 2016;16(9):e178-89.
24. European Medicines Agency. Concept paper on an addendum to the guideline on the evaluation of medicinal products indicated for treatment of bacterial infections to address paediatric-specific clinical data requirements. [http://www.ema.europa.eu/docs/en\\_GB/document\\_library/Scientific\\_guideline/2016/04/WC500205026.pdf](http://www.ema.europa.eu/docs/en_GB/document_library/Scientific_guideline/2016/04/WC500205026.pdf). (accessed July 2016)
25. Clinical Trials Transformation Initiative. <https://www.ctti-clinicaltrials.org/projects/pediatric-trials>. (accessed July 2016)
26. Clinical Trials Transformation Initiative. AACT database. <https://www.ctti-clinicaltrials.org/aact-database>. (accessed January 2017)

1  
2  
3 **LIST OF FIGURES**  
4  
5

6 **Figure 1.** Flow chart. Clinical trial selection process.  
7

8  
9 **Table 1.** Characteristics of clinical trials.  
10

11 **Table 2.** Clinical trial endpoint classification of identified clinical trials stratified by trial sponsor.  
12 Endpoint classification determined by planned primary outcomes.  
13

14  
15 **Table 3.** Clinical indication of identified clinical trials stratified by age group being recruited.  
16

17  
18 **Table 4.** Comparison of antibiotic development pipeline in adults and children. Adapted from Pew  
19 Charitable Trusts "Antibiotics currently in clinical development" pipeline (last accessed October  
20 2016).[13]  
21  
22  
23  
24  
25  
26  
27  
28  
29  
30  
31  
32  
33  
34  
35  
36  
37  
38  
39  
40  
41  
42  
43  
44  
45  
46  
47  
48  
49  
50  
51  
52  
53  
54  
55  
56  
57  
58  
59  
60

1  
2  
3  
4  
5  
6  
7  
8  
9  
10  
11  
12  
13  
14  
15  
16  
17  
18  
19  
20  
21  
22  
23  
24  
25  
26  
27  
28  
29  
30  
31  
32  
33  
34  
35  
36  
37  
38  
39  
40  
41  
42  
43  
44  
45  
46  
47  
48  
49  
50  
51  
52  
53  
54  
55  
56  
57  
58  
59  
60

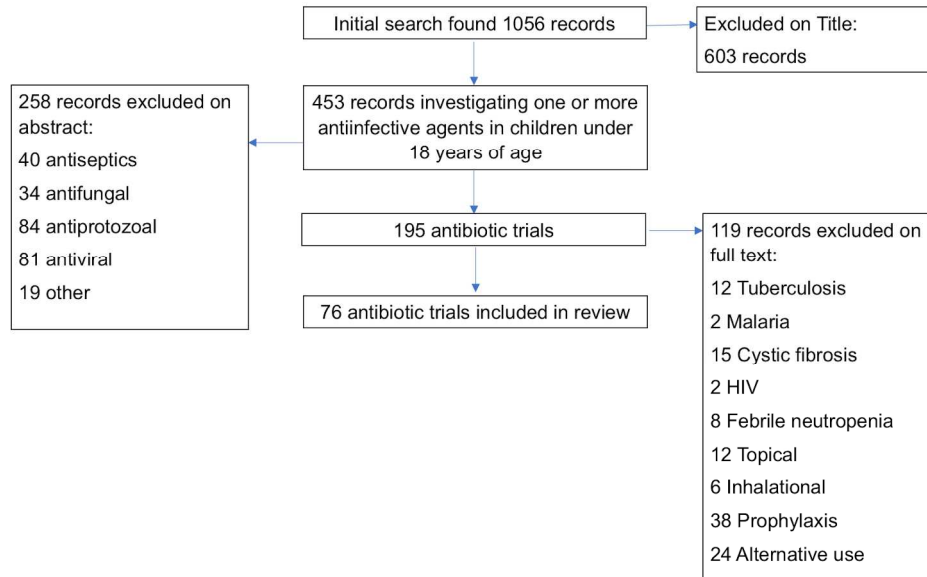

Figure 1. Flow Chart. Clinical trial selection process.

254x190mm (300 x 300 DPI)

ew only



## DATASET

|    | A                 | B                                                                                                            | C                  | D                    |
|----|-------------------|--------------------------------------------------------------------------------------------------------------|--------------------|----------------------|
| 1  | <b>NCT Number</b> | <b>Title</b>                                                                                                 | <b>Recruitment</b> | <b>Study Results</b> |
| 2  | NCT02539407       | Population Pharmacokinetics of Anti-infectives in Critically Ill Children                                    | Recruiting         | No Results Available |
| 3  | NCT02935374       | Effect of Antimicrobial Treatment of Acute Otitis Media on the Intestinal Microbiome in Children             | Not yet recruiting | No Results Available |
| 4  | NCT02899143       | Short-course Antimicrobial Therapy in Sepsis                                                                 | Recruiting         | No Results Available |
| 5  | NCT01595529       | The SCOUT Study: Short Course Therapy for Urinary Tract Infections in Children                               | Recruiting         | No Results Available |
| 6  | NCT02380352       | Short-course Antimicrobial Therapy for Paediatric Respiratory Infections                                     | Not yet recruiting | No Results Available |
| 7  | NCT02891915       | Trial to Evaluate Beta-Lactam Antimicrobial Therapy of Community Acquired Pneumonia in Children              | Recruiting         | No Results Available |
| 8  | NCT02746276       | Optimising Antibiotic Treatment for Sick Malnourished Children                                               | Recruiting         | No Results Available |
| 9  | NCT02917551       | BALANCE on the Wards: A Pilot RCT                                                                            | Not yet recruiting | No Results Available |
| 10 | NCT01243437       | A Clinical Trial to Evaluate the Safety and Efficacy of Ciprofloxacin in the Treatment of Plague in Children | Recruiting         | No Results Available |
| 11 | NCT02635191       | Tailored Therapy for Helicobacter Pylori in Children                                                         | Recruiting         | No Results Available |
| 12 | NCT01522105       | Daptomycin in Pediatric Patients With Bacterial Meningitis                                                   | Recruiting         | No Results Available |
| 13 | NCT02456974       | Antibiotic Dosing in Pediatric Intensive Care                                                                | Recruiting         | No Results Available |
| 14 | NCT00579956       | A Randomized Double Blinded Comparison of Ceftazidime and Meropenem in Severe Melioidosis                    | Recruiting         | No Results Available |
| 15 | NCT00545961       | Middle Meatal Bacteriology During Acute Respiratory Infection in Children                                    | Not yet recruiting | No Results Available |
| 16 | NCT01431326       | Pharmacokinetics of Understudied Drugs Administered to Children Per Standard of Care                         | Recruiting         | No Results Available |
| 17 | NCT02475876       | PK of Clindamycin and Trimethoprim-sulfamethoxazole in Infants and Children                                  | Recruiting         | No Results Available |
| 18 | NCT01420341       | Co-trimoxazole as Maintenance Therapy for Melioidosis                                                        | Recruiting         | No Results Available |
| 19 | NCT02266706       | Pharmacokinetic and Safety Study of Ceftolozane/Tazobactam in Pediatric Participants Receiving               | Recruiting         | No Results Available |
| 20 | NCT00867789       | Antibiotics Versus Placebo in the Treatment of Abscesses in the Emergency Department                         | Recruiting         | No Results Available |
| 21 | NCT02879981       | A Safety Study of Balsamic Bactrim in Pediatric Participants With Acute Bronchitis                           | Not yet recruiting | No Results Available |
| 22 | NCT01269541       | MESS-study MRSA Eradication Study Sk'ne                                                                      | Recruiting         | No Results Available |
| 23 | NCT02276482       | Study of Tedizolid Phosphate in Adolescents With Complicated Skin and Soft Tissue Infection (cS              | Recruiting         | No Results Available |
| 24 | NCT02663596       | Safety and TDM of Continuous Infusion Vancomycin Through Continuous Renal Replacement Th                     | Not yet recruiting | No Results Available |
| 25 | NCT02555059       | Special Drug Use Investigation of Ciproxan Injection in Pediatrics                                           | Recruiting         | No Results Available |
| 26 | NCT02297815       | Comparative Effectiveness of Antibiotics for Respiratory Infections                                          | Recruiting         | No Results Available |
| 27 | NCT02224040       | Typhoid Fever: Combined vs. Single Antibiotic Therapy                                                        | Recruiting         | No Results Available |
| 28 | NCT02775968       | Population Pharmacokinetics of Cephalosporins and Macrolides in Chinese Children With Comm                   | Not yet recruiting | No Results Available |
| 29 | NCT02687906       | Dose-finding, Pharmacokinetics, Safety, and Tolerability of Meropenem-Vaborbactam in Pediatr                 | Recruiting         | No Results Available |
| 30 | NCT02783859       | Hospitalised Pneumonia With Extended Treatment (HOPE) Study                                                  | Recruiting         | No Results Available |
| 31 | NCT01994993       | Antibiotic Safety (SCAMP)                                                                                    | Recruiting         | No Results Available |



|    | A           | B                                                                                                 | C                  | D                    |
|----|-------------|---------------------------------------------------------------------------------------------------|--------------------|----------------------|
| 32 | NCT02258763 | Trial on the Ideal Duration of Oral Antibiotics in Children With Pneumonia                        | Recruiting         | No Results Available |
| 33 | NCT02688790 | Study Evaluate the PK Profile of Dalbavancin in Hospitalized Infants and Neonates Patients With   | Recruiting         | No Results Available |
| 34 | NCT00323219 | Oral Moxifloxacin Versus Cefazolin and Oral Probenecid in the Management of Skin and Soft Tis     | Recruiting         | No Results Available |
| 35 | NCT02750761 | A Study of Oral and Intravenous (IV) Tedizolid Phosphate in Hospitalized Participants, Ages 2 to  | Recruiting         | No Results Available |
| 36 | NCT02466438 | Safety and Pharmacokinetics of Piperacillin-tazobactam Extended Infusion in Infants and Childre   | Recruiting         | No Results Available |
| 37 | NCT02260102 | Temocillin Pharmacokinetics in Paediatrics                                                        | Not yet recruiting | No Results Available |
| 38 | NCT02694458 | Comparison of Two Dosage Adjustment Strategies of Vancomycin in Children                          | Recruiting         | No Results Available |
| 39 | NCT01540838 | Slow Initial beta-lactam Infusion With High-dose Paracetamol to Improve the Outcomes of Child     | Recruiting         | No Results Available |
| 40 | NCT00368498 | A Trial to Evaluate the Loading Dose Required to Achieve Therapeutic Serum Teicoplanin Concer     | Recruiting         | No Results Available |
| 41 | NCT01785641 | Single Versus Combined Antibiotic Therapy for Bacterial Peritonitis in CAPD Patients              | Recruiting         | No Results Available |
| 42 | NCT02554383 | Efficacy of Antibiotics in Children With Acute Sinusitis: Which Subgroups Benefit?                | Recruiting         | No Results Available |
| 43 | NCT01265173 | Comparison of Efficacy of Cefotaxime, Ceftriaxone, and Ciprofloxacin for the Treatment of Spon    | Recruiting         | No Results Available |
| 44 | NCT02335905 | Ceftaroline for Treatment of Hematogenously Acquired Staphylococcus Aureus Osteomyelitis in       | Recruiting         | No Results Available |
| 45 | NCT02922686 | Penicillin for the Emergency Department Outpatient Treatment of CELLulitis                        | Not yet recruiting | No Results Available |
| 46 | NCT02848820 | Initial Non-operative Treatment Strategy Versus Appendectomy Treatment Strategy for Simple A      | Not yet recruiting | No Results Available |
| 47 | NCT02475733 | Evaluation of Safety, Pharmacokinetics and Efficacy of CAZ-AVI With Metronidazole in Children A   | Recruiting         | No Results Available |
| 48 | NCT02372461 | Randomized Trial of Amoxicillin Versus Placebo for (Fast Breathing) Pneumonia                     | Recruiting         | No Results Available |
| 49 | NCT01553006 | Study of Cefditoren Pivoxil in Treatment of Childhood With Acute Rhinosinusitis                   | Recruiting         | No Results Available |
| 50 | NCT02527681 | Pharmacokinetics and Safety of Ceftobiprole in Neonates and Infants up to 3 Months Treated W      | Recruiting         | No Results Available |
| 51 | NCT02210169 | RCT of Continuous Versus Intermittent Infusion of Vancomycin in Neonates                          | Recruiting         | No Results Available |
| 52 | NCT02497781 | Evaluation of Safety, Pharmacokinetics and Efficacy of Ceftazidime and Avibactam (CAZ-AVI ) Co    | Recruiting         | No Results Available |
| 53 | NCT02814916 | Dalbavancin for the Treatment of Acute Bacterial Skin and Skin Structure Infections in Children,  | Not yet recruiting | No Results Available |
| 54 | NCT02210325 | Efficacy and Safety Study of Oral Solithromycin Compared to Intramuscular Ceftriaxone Plus Ora    | Recruiting         | No Results Available |
| 55 | NCT02801370 | Phase 3 Study of OTO-201 in Acute Otitis Externa                                                  | Recruiting         | No Results Available |
| 56 | NCT02760420 | 3 Days Amoxicillin Versus Placebo for Fast Breathing Childhood Pneumonia in Malawi                | Recruiting         | No Results Available |
| 57 | NCT02678195 | 3 Days Versus 5 Days Amoxicillin for Chest-indrawing Childhood Pneumonia in Malawi                | Recruiting         | No Results Available |
| 58 | NCT02605122 | Safety and Efficacy of Solithromycin in Adolescents and Children With Community-acquired Bact     | Recruiting         | No Results Available |
| 59 | NCT02570490 | Oral Sodium Fusidate (CEM-102) Versus Oral Linezolid for the Treatment of Acute Bacterial Skin    | Recruiting         | No Results Available |
| 60 | NCT02443285 | Is Spontaneous Bacterial Peritonitis Still Responding to 3rd Generation Cephalosporins?           | Recruiting         | No Results Available |
| 61 | NCT02334124 | Comparing the Intravenous Treatment of Skin Infections in Children, Home Versus Hospital          | Recruiting         | No Results Available |
| 62 | NCT02218372 | A Study to Investigate the Safety and Efficacy of Fidaxomicin (Oral Suspension or Tablets) and Va | Recruiting         | No Results Available |

1  
2  
3  
4  
5  
6  
7  
8  
9  
10  
11  
12  
13  
14  
15  
16  
17  
18  
19  
20  
21  
22  
23  
24  
25  
26  
27  
28  
29  
30  
31  
32  
33  
34  
35  
36  
37  
38  
39  
40  
41  
42  
43  
44  
45  
46  
47

|    | A           | B                                                                                                | C                  | D                    |
|----|-------------|--------------------------------------------------------------------------------------------------|--------------------|----------------------|
| 63 | NCT01032499 | Open and Comparative Study to Measure Tolerability and Efficacy of Taro Elixir                   | Not yet recruiting | No Results Available |
| 64 | NCT02598362 | Pharmacokinetics of Ciprofloxacin in Pediatric Patients                                          | Recruiting         | No Results Available |
| 65 | NCT02878031 | Community Case Management of Chest Indrawing Pneumonia                                           | Recruiting         | No Results Available |
| 66 | NCT02790996 | Neonatal Vancomycin Trial                                                                        | Not yet recruiting | No Results Available |
| 67 | NCT02712307 | Study of 5 and 10 Days Treatment With Penicillin Against Sore Throat Caused by Streptococci      | Recruiting         | No Results Available |
| 68 | NCT02424734 | Safety, Tolerability and Efficacy of Ceftaroline in Paediatrics With Late-Onset Sepsis           | Recruiting         | No Results Available |
| 69 | NCT02134301 | Open-Label, Dose-Finding, Pharmacokinetics, Safety and Tolerability Study of Oritavancin in Ped  | Recruiting         | No Results Available |
| 70 | NCT02013141 | An Open-Label Study of the Pharmacokinetics of a Single Dose of Telavancin in Pediatric Subject  | Recruiting         | No Results Available |
| 71 | NCT01427842 | Dose Enhancement of Vancomycin IN Everyday Patients                                              | Recruiting         | No Results Available |
| 72 | NCT01278017 | The Role of Short-course Ceftriaxone Therapy in the Treatment of Severe Nontyphoidal Salmon      | Recruiting         | No Results Available |
| 73 | NCT00988026 | Safety and Efficacy Comparison of Minocycline Microgranules Versus Lymecycline in the Treatm     | Recruiting         | No Results Available |
| 74 | NCT02288234 | Telavancin Observational Use Registry (TOUR)                                                     | Recruiting         | No Results Available |
| 75 | NCT01304459 | Vancomycin Serum Concentrations in Pediatric Oncology Patients Under Intensive Care              | Recruiting         | No Results Available |
| 76 | NCT01173575 | Assessment of the Efficacy of FOSFOMYCIN in Patients With Bacterial Infection                    | Recruiting         | No Results Available |
| 77 | NCT01778634 | Trial of Intravenous Azithromycin to Eradicate Ureaplasma Respiratory Tract Infection in Preterr | Recruiting         | No Results Available |

|    | E                                                                     | F                         |
|----|-----------------------------------------------------------------------|---------------------------|
| 1  |                                                                       |                           |
| 2  |                                                                       |                           |
| 3  | <b>1 Indication</b>                                                   | <b>Infection category</b> |
| 4  | 2 Proven or suspected infection (in patients on PICU)                 | 9                         |
| 5  | 3 Acute Otitis Media                                                  | 3                         |
| 6  | 4 Sepsis                                                              | 8                         |
| 7  | 5 Urinary Tract Infections (UTI)                                      | 7                         |
| 8  | 6 Community-acquired Pneumonia (CAP)                                  | 4                         |
| 9  | 7 Pneumonia                                                           | 4                         |
| 10 | 8 Proven or suspected infection in patients with malnutrition         | 9                         |
| 11 | 9 Bacteremia                                                          | 8                         |
| 12 | 10 Plague                                                             | 8                         |
| 13 | 11 Helicobacter Pylori Infection                                      | 7                         |
| 14 | 12 Meningitis                                                         | 1                         |
| 15 | 13 Proven or suspected bacterial infection (Pharmacokinetics)         | 9                         |
| 16 | 14 Melioidosis                                                        | 8                         |
| 17 | 15 Acute Respiratory Infection   Sinusitis                            | 3                         |
| 18 | 16 Various infections (including nosocomial Pneumonia, CAP, Acute Bac | Various                   |
| 19 | 17 Bacterial Infections                                               | 9                         |
| 20 | 18 Melioidosis                                                        | 8                         |
| 21 | 19 Proven or Suspected Gram-negative Bacterial Infection              | 9                         |
| 22 | 20 Abscess                                                            | 1                         |
| 23 | 21 Bronchitis                                                         | 4                         |
| 24 | 22 Throatcarriers of MRSA                                             | 3                         |
| 25 | 23 Acute Skin and Soft Tissue infections (aSSTIs)                     | 2                         |
| 26 | 24 Proven or suspected bacterial infection (in CRRT patients)         | 9                         |
| 27 | 25 Cystitis / Pyelonephritis                                          | 7                         |
| 28 | 26 Acute Upper Respiratory Tract Infections (ARTIs)                   | 3                         |
| 29 | 27 Typhoid Fever                                                      | 8                         |
| 30 | 28 Community Acquired Pneumonia (CAP)                                 | 4                         |
| 31 | 29 Bacterial Infections                                               | 9                         |
| 32 | 30 Pneumonia                                                          | 4                         |
| 33 | 31 Complicated Intra Abdominal Infections (cIAs)                      | 6                         |
| 34 |                                                                       |                           |
| 35 |                                                                       |                           |
| 36 |                                                                       |                           |
| 37 |                                                                       |                           |
| 38 |                                                                       |                           |
| 39 |                                                                       |                           |
| 40 |                                                                       |                           |
| 41 |                                                                       |                           |
| 42 |                                                                       |                           |
| 43 |                                                                       |                           |
| 44 |                                                                       |                           |
| 45 |                                                                       |                           |
| 46 |                                                                       |                           |
| 47 |                                                                       |                           |

|    | E                                                           | F |
|----|-------------------------------------------------------------|---|
| 32 | Pneumonia                                                   | 4 |
| 33 | Bacterial Infections                                        | 9 |
| 34 | Cellulitis                                                  | 2 |
| 35 | Gram-Positive Bacterial Infections                          | 9 |
| 36 | Infection                                                   | 9 |
| 37 | Urinary Tract Infection or suspected Cholangitis            | 7 |
| 38 | Methicillin-resistant Staphylococcal Infections             | 9 |
| 39 | Bacterial Meningitis                                        | 1 |
| 40 | Staphylococcal Infections                                   | 9 |
| 41 | Peritonitis (in CAPD patients)                              | 6 |
| 42 | Acute Sinusitis (Respiratory Tract Infections)              | 3 |
| 43 | SBP in patients with Liver Cirrhosis                        | 6 |
| 44 | Hematogenously Acquired Staphylococcus Aureus Osteomyelitis | 5 |
| 45 | Cellulitis or Wound Infection                               | 8 |
| 46 | Appendicitis                                                | 6 |
| 47 | Complicated Intra-abdominal Infections (cIAls)              | 6 |
| 48 | Pneumonia (fast-breathing)                                  | 4 |
| 49 | Rhinosinusitis                                              | 3 |
| 50 | Bacterial Infections                                        | 9 |
| 51 | Sepsis                                                      | 8 |
| 52 | Complicated Urinary Tract Infections (cUTIs)                | 7 |
| 53 | Methicillin-Resistant Staphylococcus Aureus Skin Infection  | 2 |
| 54 | Uncomplicated Urogenital Gonorrhoea                         | 7 |
| 55 | Acute Otitis Externa                                        | 3 |
| 56 | Pneumonia                                                   | 4 |
| 57 | Pneumonia                                                   | 4 |
| 58 | Community-acquired Bacterial Pneumonia                      | 4 |
| 59 | Acute Bacterial Skin and Skin Structure Infections          | 2 |
| 60 | Primary Bacterial Peritonitis                               | 6 |
| 61 | Cellulitis                                                  | 8 |
| 62 | Clostridium Difficile-associated Diarrhea (CDAD)            | 6 |

|    | E                                                                       | F       |
|----|-------------------------------------------------------------------------|---------|
| 1  |                                                                         |         |
| 2  |                                                                         |         |
| 3  | 63 Acne Vulgaris II or III Degree                                       | 2       |
| 4  | 64 Urinary Tract Infection or Pyelonephritis                            | 7       |
| 5  | 65 Pneumonia                                                            | 4       |
| 6  | 66 Late Onset Neonatal Sepsis                                           | 8       |
| 7  | 67 Tonsillitis                                                          | 3       |
| 8  | 68 Late-onset Sepsis                                                    | 8       |
| 9  | 69 Gram Positive Bacterial Infections                                   | 9       |
| 10 | 70 Gram-Positive Bacterial Infections                                   | 9       |
| 11 | 71 Vancomycin Therapy                                                   | 9       |
| 12 | 72 Diarrhea                                                             | 6       |
| 13 | 73 Mild to Moderate Acne                                                | 2       |
| 14 | 74 Hospital Acquired Bacterial Pneumonia (HAP), Complicated Skin and    | Various |
| 15 | 75 Infection                                                            | 9       |
| 16 | 76 Bacterial Infection                                                  | 9       |
| 17 | 77 Eradicate ureaplasma respiratory tract infection from preterm infant | 4       |
| 18 |                                                                         |         |
| 19 |                                                                         |         |
| 20 |                                                                         |         |
| 21 |                                                                         |         |
| 22 |                                                                         |         |
| 23 |                                                                         |         |
| 24 |                                                                         |         |
| 25 |                                                                         |         |
| 26 |                                                                         |         |
| 27 |                                                                         |         |
| 28 |                                                                         |         |
| 29 |                                                                         |         |
| 30 |                                                                         |         |
| 31 |                                                                         |         |
| 32 |                                                                         |         |
| 33 |                                                                         |         |
| 34 |                                                                         |         |
| 35 |                                                                         |         |
| 36 |                                                                         |         |
| 37 |                                                                         |         |
| 38 |                                                                         |         |
| 39 |                                                                         |         |
| 40 |                                                                         |         |
| 41 |                                                                         |         |
| 42 |                                                                         |         |
| 43 |                                                                         |         |
| 44 |                                                                         |         |
| 45 |                                                                         |         |
| 46 |                                                                         |         |
| 47 |                                                                         |         |

|    | G                                                                                   | H                                  | I             | J                     |
|----|-------------------------------------------------------------------------------------|------------------------------------|---------------|-----------------------|
| 1  |                                                                                     |                                    |               |                       |
| 2  |                                                                                     |                                    |               |                       |
| 3  | <b>1 Interventions</b>                                                              | <b>Antibiotic class (J01 code)</b> | <b>Gender</b> | <b>Age</b>            |
| 4  | 2 Antiinfectives (beta-lactam, aminoglycoside, glycopeptide, fluoroquinolone,       | Various                            | Both          | Up to 18 Years        |
| 5  | 3 Amoxicillin, Amoxicillin-Potassium Clavulanate, Macrolide                         | Various                            | Both          | 6 Months to 7 Years   |
| 6  | 4 Antibiotic                                                                        | J01                                | Both          | Up to 18 years        |
| 7  | 5 Trimethoprim sulfamethoxazole, cefixime, or cephalexin                            | Various                            | Both          | 2 Months to 10 Years  |
| 8  | 6 Amoxicillin                                                                       | J01C                               | Both          | 6 Months to 10 Years  |
| 9  | 7 Amoxicillin, Amoxicillin-clavulanate, Cefdinir                                    | Various                            | Both          | 6 Months to 71 Months |
| 10 | 8 Ceftriaxone, Metronidazole                                                        | J01D                               | Both          | 2 Months to 59 Months |
| 11 | 9 7 days vs 14 days of adequate antibiotic treatment                                | J01                                | Both          | Up to 18 years        |
| 12 | 10 Ciprofloxacin, doxyxcycline                                                      | Various                            | Both          | 8 Years and older     |
| 13 | 11 Tailored vs standard therapy (Amoxicillin, Clarithromycin, Metronidazole, Ra     | Various                            | Both          | 4 Years to 18 Years   |
| 14 | 12 Daptomycin                                                                       | J01X                               | Both          | 3 Months to 16 Years  |
| 15 | 13 Amoxicillin-clavulanate, Piperacilline-tazobactam, Vancomycin                    | Various                            | Both          | Up to 16 Years        |
| 16 | 14 Meropenem, Ceftazidime                                                           | J01D                               | Both          | 15 Years and older    |
| 17 | 15 Amoxicillin clavulanate acid                                                     | J01C                               | Both          | 6 Years to 13 Years   |
| 18 | 16 Various drugs (Ceftazidime, Ciprofloxacin, Clindamycin, Doxycycline, Levoflo     | Various                            | Both          | Up to 18 years        |
| 19 | 17 Clindamycin, Trimethoprim-sulfamethoxazole                                       | Various                            | Both          | 1 Month to 16 Years   |
| 20 | 18 Co-trimoxazole                                                                   | J01E                               | Both          | 15 Years and older    |
| 21 | 19 Ceftolozane/Tazobactam                                                           | J01D                               | Both          | Up to 17 Years        |
| 22 | 20 Trimethoprim-sulfamethoxazole                                                    | J01E                               | Both          | 3 Months to 17 Years  |
| 23 | 21 Guaifenesin, Sulfamethoxazole trimethoprim                                       | J01E                               | Both          | 4 Years to 14 Years   |
| 24 | 22 Systemic Rifampin and Clindamycine/Trimehoprimsulfa, or Topical mupiroci         | Various                            | Both          | 5 Years and older     |
| 25 | 23 Tedizolid Phosphate                                                              | J01X                               | Both          | 12 Years to 18 Years  |
| 26 | 24 Vancomycin                                                                       | J01X                               | Both          | Up to 18 years        |
| 27 | 25 Ciprofloxacin                                                                    | J01F                               | Both          | Up to 14 Years        |
| 28 | 26 Antibiotics (Amoxicillin-clavulanate, azithromycin, cefdinir, cefprozil, cefurox | Various                            | Both          | 6 Months to 18 Years  |
| 29 | 27 Ceftriaxone, Ceftriaxone/azithromycin, Azithromycin, Azithromycin/cefixime       | Various                            | Both          | 2 Years to 80 Years   |
| 30 | 28 Cephalosporins and Macrolides                                                    | Various                            | Both          | 1 Year to 18 Years    |
| 31 | 29 Carbavance                                                                       | J01D                               | Both          | Up to 17 Years        |
| 32 | 30 Amoxicillin-clavulanic Acid                                                      | J01C                               | Both          | 3 Months to 5 Years   |
| 33 | 31 Ampicillin/metronidazole/gentamicin/clindamycin/Piperacillin-tazobactam c        | Various                            | Both          | Up to 120 Days        |

|    | G                                                                       | H       | I    | J                     |
|----|-------------------------------------------------------------------------|---------|------|-----------------------|
| 32 | Amoxicillin-Potassium Clavulanate                                       | J01C    | Both | 3 Months to 59 Months |
| 33 | Dalbavancin                                                             | J01X    | Both | Up to 28 Days         |
| 34 | Cefazolin/Moxifloxacin                                                  | Various | Both | Up to 18 Years        |
| 35 | Tedizolid Phosphate                                                     | J01X    | Both | 2 Years to 11 Years   |
| 36 | Piperacillin-tazobactam                                                 | J01C    | Both | 2 Months to 6 Years   |
| 37 | Temocillin                                                              | J01C    | Both | 6 Months to 3 Years   |
| 38 | Vancomycin                                                              | J01X    | Both | 1 Month to 16 Years   |
| 39 | Beta-lactam                                                             | J01C    | Both | 2 Months to 15 Years  |
| 40 | Teicoplanin                                                             | J01X    | Both | 16 Years and older    |
| 41 | Ceftazidime/ciprofloxacin, Ceftazidime, Cefazolin/gentamicin, Cefazolin | Various | Both | 15 Years and older    |
| 42 | Amoxicillin-clavulanate                                                 | J01C    | Both | 2 Years to 11 Years   |
| 43 | Cefotaxime, Ceftriaxone, Ciprofloxacin                                  | Various | Both | 16 Years and older    |
| 44 | Ceftaroline Fosamil                                                     | J01D    | Both | 1 Year to 17 Years    |
| 45 | Flucloxacillin, Phenoxymethylpenicillin                                 | J01C    | Both | 16 Years and older    |
| 46 | Augmentin/Gentamicin, Appendectomy                                      | J01C    | Both | 7 Years to 17 Years   |
| 47 | Ceftazidime-avibactam, Meropenem, Metronidazole                         | Various | Both | 3 Months to 18 Years  |
| 48 | Amoxicillin                                                             | J01C    | Both | 2 Months to 59 Months |
| 49 | Cefditoren pivoxil                                                      | J01D    | Both | 1 Year to 15 Years    |
| 50 | Ceftobiprole                                                            | J01D    | Both | Up to 3 Months        |
| 51 | Vancomycin                                                              | J01X    | Both | Up to 90 Days         |
| 52 | Ceftazidime-avibactam, Cefepime                                         | J01D    | Both | 3 Months to 18 Years  |
| 53 | Dalbavancin single dose                                                 | J01X    | Both | 3 Months to 17 Years  |
| 54 | Solithromycin, Ceftriaxone, Azithromycin                                | Various | Both | 15 Years and older    |
| 55 | Ciprofloxacin                                                           | J01M    | Both | 6 Months and older    |
| 56 | Amoxicillin                                                             | J01C    | Both | 2 Months to 59 Months |
| 57 | Amoxicillin                                                             | J01C    | Both | 2 Months to 59 Months |
| 58 | Solithromycin                                                           | J01F    | Both | 2 Months to 17 Years  |
| 59 | Sodium fusidate, Linezolid                                              | J01X    | Both | 12 Years and older    |
| 60 | Cefotaxime, Ceftriaxone                                                 | J01D    | Both | Up to 18 Years        |
| 61 | Ceftriaxone, Flucloxacillin                                             | Various | Both | 6 Months to 18 Years  |
| 62 | Fidaxomicin, Vancomycin                                                 | J01X    | Both | Up to 17 Years        |



1  
2  
3  
4  
5  
6  
7  
8  
9  
10  
11  
12  
13  
14  
15  
16  
17  
18  
19  
20  
21  
22  
23  
24  
25  
26  
27  
28  
29  
30  
31  
32  
33  
34  
35  
36  
37  
38  
39  
40  
41  
42  
43  
44  
45  
46  
47

|    | G                        | H    | I    | J                     |
|----|--------------------------|------|------|-----------------------|
| 63 | Taro Elixir              | J01A | Both | 14 Years and older    |
| 64 | Ciprofloxacin            | J01M | Both | 3 Months to 17 Years  |
| 65 | Amoxicillin              | J01C | Both | 2 Months to 59 Months |
| 66 | Vancomycin               | J01X | Both | Up to 90 Days         |
| 67 | Phenoxymethylpenicillin  | J01C | Both | 6 Years and older     |
| 68 | Ceftaroline Fosamil      | J01D | Both | Up to 59 Days         |
| 69 | Oritavancin              | J01X | Both | Up to 18 Years        |
| 70 | Telavancin               | J01X | Both | 1 Year to 17 Years    |
| 71 | Vancomycin               | J01X | Both | 16 Years and older    |
| 72 | Ceftriaxone              | J01D | Both | 3 Months to 18 Years  |
| 73 | Minocycline, Lymecycline | J01A | Both | 14 Years to 30 Years  |
| 74 | Telavancin               | J01X | Both | Up to 18 Years        |
| 75 | Vancomycin               | J01X | Both | Up to 18 Years        |
| 76 | Fosfomycin               | J01X | Both | Up to 18 Years        |
| 77 | Azithromycin             | J01F | Both | 0 to 72 hours         |



|    | K         | L                    | M                                  | N                           | O                 |
|----|-----------|----------------------|------------------------------------|-----------------------------|-------------------|
| 1  | Age group | Estimated enrollment | Location                           | Income class                | Geographic region |
| 2  | 8         | 1850                 | France                             | High income                 | Europe            |
| 3  | 9         | 150                  | Finland                            | High income                 | Europe            |
| 4  | 8         | 320                  | Italy                              | High income                 | Europe            |
| 5  | 9         | 746                  | United States                      | High income                 | North America     |
| 6  | 9         | 270                  | Canada                             | High income                 | North America     |
| 7  | 9         | 400                  | United States                      | High income                 | North America     |
| 8  | 9         | 80                   | Kenya                              | Lower middle income         | Africa            |
| 9  | 8         | 50                   | Canada                             | High income                 | North America     |
| 10 | 11        | 200                  | Uganda                             | Low income                  | Africa            |
| 11 | 11        | 200                  | China                              | Upper middle income         | Asia              |
| 12 | 10        | 5                    | Switzerland                        | High income                 | Europe            |
| 13 | 8         | 200                  | Belgium                            | High income                 | Europe            |
| 14 | 5         | 750                  | Thailand                           | Upper middle income         | Asia              |
| 15 | 11        | 120                  | Finland                            | High income                 | Europe            |
| 16 | 8         | 3000                 | Various (United States, Canada)    | High income                 | International     |
| 17 | 10        | 54                   | United States                      | High income                 | North America     |
| 18 | 5         | 800                  | Thailand                           | Upper middle income         | Asia              |
| 19 | 8         | 36                   | United States                      | High income                 | North America     |
| 20 | 10        | 200                  | United States                      | High income                 | North America     |
| 21 | 11        | 50                   | Peru                               | Upper middle income         | Latin America     |
| 22 | 11        | 69                   | Sweden                             | High income                 | North America     |
| 23 | 5         | 162                  | Various (United States, Argentina) | Upper middle to High income | International     |
| 24 | 8         | 10                   | United States                      | High income                 | North America     |
| 25 | 8         | 45                   | Japan                              | High income                 | Asia              |
| 26 | 10        | 117000               | United States                      | High income                 | North America     |
| 27 | 11        | 120                  | Nepal                              | Low income                  | Asia              |
| 28 | 10        | 750                  | China                              | Upper middle income         | Asia              |
| 29 | 8         | 56                   | United States                      | High income                 | North America     |
| 30 | 9         | 314                  | Various (Australia, Malaysia)      | High income                 | Oceania           |
| 31 | 6         | 284                  | Various (United States, Canada)    | High income                 | North America     |

|    | K  | L    | M                              | N                           | O             |
|----|----|------|--------------------------------|-----------------------------|---------------|
| 32 | 9  | 300  | Malaysia                       | Upper middle income         | Asia          |
| 33 | 2  | 24   | United States                  | High income                 | North America |
| 34 | 8  | 390  | Canada                         | High income                 | North America |
| 35 | 4  | 32   | United States                  | High income                 | North America |
| 36 | 9  | 141  | Canada                         | High income                 | North America |
| 37 | 9  | 45   | Belgium                        | High income                 | Europe        |
| 38 | 10 | 100  | France                         | High income                 | Europe        |
| 39 | 10 | 400  | Angola                         | Upper middle income         | Africa        |
| 40 | 5  | 20   | Taiwan, China                  | High income                 | Asia          |
| 41 | 5  | 300  | Thailand                       | Upper middle income         | Asia          |
| 42 | 4  | 688  | United States                  | High income                 | North America |
| 43 | 5  | 261  | Republic of Korea              | High income                 | Asia          |
| 44 | 10 | 18   | United States                  | High income                 | North America |
| 45 | 5  | 414  | Ireland                        | High income                 | Europe        |
| 46 | 11 | 334  | Netherlands                    | High income                 | Europe        |
| 47 | 10 | 102  | Various (United States, Argent | Upper middle to High income | International |
| 48 | 9  | 2500 | Pakistan                       | Lower middle income         | Asia          |
| 49 | 10 | 120  | Thailand                       | Upper middle income         | Asia          |
| 50 | 6  | 45   | Various (Belgium, Germany, Li  | High income                 | Europe        |
| 51 | 6  | 200  | Australia                      | High income                 | Oceania       |
| 52 | 10 | 102  | Various (United States, Czech  | Upper middle to High income | International |
| 53 | 10 | 300  | United States                  | High income                 | North America |
| 54 | 5  | 300  | Various (United States, Austra | High income                 | International |
| 55 | 10 | 500  | Various (United States, Canad  | High income                 | North America |
| 56 | 9  | 2000 | Malawi                         | Low income                  | Africa        |
| 57 | 9  | 2000 | Malawi                         | Low income                  | Africa        |
| 58 | 10 | 400  | Various (United States, Bulgar | High income                 | International |
| 59 | 5  | 712  | Various (United States, Puertc | High income                 | International |
| 60 | 8  | 100  | Egypt                          | Lower middle income         | Africa        |
| 61 | 10 | 188  | Australia                      | High income                 | Oceania       |
| 62 | 8  | 144  | Various (United States, Belgiu | High income                 | International |

|    | K  | L    | M                                | N                   | O             |
|----|----|------|----------------------------------|---------------------|---------------|
| 63 | 5  | 120  | Brazil                           | Upper middle income | Latin America |
| 64 | 10 | 20   | Belgium                          | High income         | Europe        |
| 65 | 9  | 308  | Nigeria                          | Lower middle income | Africa        |
| 66 | 6  | 300  | Various (United Kingdom, France) | High income         | Europe        |
| 67 | 11 | 432  | Sweden                           | High income         | Europe        |
| 68 | 7  | 24   | Various (United States, Hungary) | High income         | International |
| 69 | 8  | 60   | United States                    | High income         | North America |
| 70 | 10 | 32   | United States                    | High income         | North America |
| 71 | 5  | 100  | Australia                        | High income         | Oceania       |
| 72 | 10 | 200  | Taiwan, China                    | High income         | Asia          |
| 73 | 5  | 168  | Mexico                           | High income         | North America |
| 74 | 8  | 1000 | United States                    | High income         | North America |
| 75 | 8  | 50   | Brazil                           | Upper middle income | Latin America |
| 76 | 8  | 200  | Various (Austria, Germany)       | High income         | Europe        |
| 77 | 1  | 180  | United States                    | High income         | North America |

|    | P                                                    | Q              | R                  | S              | T                              |
|----|------------------------------------------------------|----------------|--------------------|----------------|--------------------------------|
| 1  | <b>Collaborators</b>                                 | <b>Sponsor</b> | <b>Study Types</b> | <b>Phase</b>   | <b>Endpoint classification</b> |
| 2  | Assistance Publique - Hopitaux de Paris              | Hospital       | Observational      | Not applicable | Pharmacokinetics               |
| 3  | University of Oulu Oulu University Hospital          | University     | Interventional     | Phase 4        | Efficacy                       |
| 4  | Ospedale Santa Maria delle Croci                     | Hospital       | Interventional     | Phase 2        | Safety/Efficacy                |
| 5  | Children's Hospital of Philadelphia Children's Ho    | Hospital       | Interventional     | Phase 2        | Safety/Efficacy                |
| 6  | Hamilton Health Sciences Corporation Children's      | Hospital       | Interventional     | Phase 4        | Safety/Efficacy                |
| 7  | National Institute of Allergy and Infectious Disease | NIH            | Interventional     | Phase 4        | Efficacy                       |
| 8  | University of Oxford KEMRI Wellcome Trust Rese       | University     | Interventional     | Phase 2        | Pharmacokinetics               |
| 9  | Sunnybrook Health Sciences Centre                    | Hospital       | Interventional     | Not specified  | Efficacy                       |
| 10 | Centers for Disease Control and Prevention MRC       | CDC            | Interventional     | Phase 2        | Safety/Efficacy                |
| 11 | Beijing Children's Hospital                          | Hospital       | Interventional     | Phase 4        | Safety/Efficacy                |
| 12 | University Hospital Inselspital, Berne               | Hospital       | Interventional     | Phase 1        | Pharmacokinetics               |
| 13 | University Hospital, Ghent University Hospital, A    | Hospital       | Observational      | Not applicable | Pharmacokinetics               |
| 14 | University of Oxford Mahidol University Wellcor      | University     | Interventional     | Not specified  | Efficacy                       |
| 15 | Oulu University Hospital                             | University     | Interventional     | Phase 4        | Safety/Efficacy                |
| 16 | Daniel Benjamin Eunice Kennedy Shriver Nationa       | University     | Observational      | Not applicable | Pharmacokinetics               |
| 17 | Michael Cohen-Wolkowicz Eunice Kennedy Shriv         | University     | Interventional     | Phase 1        | Pharmacokinetics               |
| 18 | Khon Kaen University                                 | University     | Interventional     | Not specified  | Efficacy                       |
| 19 | Cubist Pharmaceuticals LLC                           | Industry       | Interventional     | Phase 1        | Pharmacokinetics               |
| 20 | Children's Mercy Hospital Kansas City Blue Cross     | Hospital       | Interventional     | Not specified  | Efficacy                       |
| 21 | Hoffmann-La Roche                                    | Industry       | Observational      | Not applicable | Safety                         |
| 22 | Region Skane                                         | Hospital       | Interventional     | Not specified  | Efficacy                       |
| 23 | Cubist Pharmaceuticals LLC                           | Industry       | Interventional     | Phase 3        | Safety                         |
| 24 | Drexel University The Center for Pediatric Pharm     | University     | Interventional     | Phase 1        | Safety                         |
| 25 | Bayer                                                | Industry       | Observational      | Not applicable | Safety/Efficacy                |
| 26 | Children's Hospital of Philadelphia                  | Hospital       | Observational      | Not applicable | Safety/Efficacy                |
| 27 | Sheba Medical Center                                 | Hospital       | Interventional     | Phase 4        | Efficacy                       |
| 28 | Beijing Children's Hospital                          | Hospital       | Observational      | Not applicable | Pharmacokinetics               |
| 29 | Rempex Pharmaceuticals (a wholly owned subsidi       | Industry       | Interventional     | Phase 1        | Safety                         |
| 30 | Menzies School of Health Research Griffith Univ      | University     | Interventional     | Phase 4        | Safety/Efficacy                |
| 31 | Michael Cohen-Wolkowicz The EMMES Corpora            | University     | Interventional     | Phase 2-3      | Safety                         |

|    | P                                                                                | Q                   | R              | S             | T                |
|----|----------------------------------------------------------------------------------|---------------------|----------------|---------------|------------------|
| 32 | University of Malaya   Menzies School of Health Research                         | University          | Interventional | Phase 4       | Efficacy         |
| 33 | Durata Therapeutics Inc., an affiliate of Allergan                               | Industry            | Interventional | Phase 1       | Pharmacokinetics |
| 34 | University of British Columbia                                                   | University          | Interventional | Phase 3       | Efficacy         |
| 35 | Merck Sharp & Dohme Corp.                                                        | Industry            | Interventional | Phase 1       | Pharmacokinetics |
| 36 | St. Justine's Hospital                                                           | Hospital            | Interventional | Phase 1       | Pharmacokinetics |
| 37 | Université Catholique de Louvain                                                 | University          | Interventional | Phase 4       | Pharmacokinetics |
| 38 | Assistance Publique - Hôpitaux de Paris                                          | Hospital            | Interventional | Not specified | Pharmacokinetics |
| 39 | Helsinki University   Foundation for Paediatric Research                         | University          | Interventional | Phase 4       | Safety/Efficacy  |
| 40 | National Taiwan University Hospital                                              | University          | Interventional | Phase 4       | Pharmacokinetics |
| 41 | Chulalongkorn University                                                         | University          | Interventional | Not specified | Efficacy         |
| 42 | University of Pittsburgh   National Institute of Allergy and Infectious Diseases | University          | Interventional | Phase 3       | Safety/Efficacy  |
| 43 | Korea University                                                                 | University          | Interventional | Phase 4       | Efficacy         |
| 44 | Baylor College of Medicine   Forest Laboratories                                 | University          | Interventional | Phase 1-2     | Safety/Efficacy  |
| 45 | Royal College of Surgeons, Ireland   Health Research Board                       | University          | Interventional | Phase 4       | Efficacy         |
| 46 | Ramon Gorter   ZonMw: The Netherlands Organisation for Scientific Research       | University          | Interventional | Phase 4       | Efficacy         |
| 47 | AstraZeneca   PRA Health Sciences                                                | Industry            | Interventional | Phase 2       | Safety/Efficacy  |
| 48 | Aga Khan University                                                              | University          | Interventional | Not specified | Efficacy         |
| 49 | Thammasat University                                                             | University          | Interventional | Phase 4       | Safety/Efficacy  |
| 50 | Basilea Pharmaceutica                                                            | Industry            | Interventional | Phase 1       | Pharmacokinetics |
| 51 | Murdoch Childrens Research Institute   Royal Children's Hospital                 | University          | Interventional | Not specified | Pharmacokinetics |
| 52 | AstraZeneca   PRA Health Sciences                                                | Industry            | Interventional | Phase 2       | Safety/Efficacy  |
| 53 | Durata Therapeutics Inc., an affiliate of Allergan                               | Industry            | Interventional | Phase 3       | Safety/Efficacy  |
| 54 | Cempra Inc   National Institute of Allergy and Infectious Diseases               | Industry            | Interventional | Phase 3       | Efficacy         |
| 55 | Otonomy, Inc.                                                                    | Industry            | Interventional | Phase 3       | Efficacy         |
| 56 | Save the Children   University of North Carolina   UNC Children's Hospital       | Health Organisation | Interventional | Phase 4       | Efficacy         |
| 57 | Save the Children   University of North Carolina   UNC Children's Hospital       | Health Organisation | Interventional | Phase 4       | Efficacy         |
| 58 | Cempra Inc                                                                       | Industry            | Interventional | Phase 2-3     | Safety/Efficacy  |
| 59 | Cempra Inc                                                                       | Industry            | Interventional | Phase 3       | Safety/Efficacy  |
| 60 | Tanta University                                                                 | University          | Interventional | Phase 3       | Efficacy         |
| 61 | Murdoch Childrens Research Institute                                             | University          | Interventional | Not specified | Efficacy         |
| 62 | Astellas Pharma Europe B.V.   Merck Sharp & Dohme                                | Industry            | Interventional | Phase 3       | Safety/Efficacy  |

|    | P                                                  | Q               | R              | S              | T                |
|----|----------------------------------------------------|-----------------|----------------|----------------|------------------|
| 63 | Laboratorios Goulart S.A.                          | Industry        | Interventional | Phase 3        | Safety/Efficacy  |
| 64 | University Hospital, Ghent   Universitair Ziekenhu | University      | Interventional | Phase 4        | Pharmacokinetics |
| 65 | Malaria Consortium   World Health Organization     | Health Organisa | Interventional | Phase 4        | Safety           |
| 66 | PENTA Foundation   St George's, University of Lor  | Health Organisa | Interventional | Phase 2        | Safety/Efficacy  |
| 67 | Sigvard Mì   Istad   Public Health Agency of Swede | University      | Interventional | Phase 4        | Safety/Efficacy  |
| 68 | AstraZeneca   PRA Health Sciences                  | Industry        | Interventional | Phase 2-3      | Safety/Efficacy  |
| 69 | The Medicines Company                              | Industry        | Interventional | Phase 1        | Pharmacokinetics |
| 70 | Theravance Biopharma Antibiotics, Inc.             | Industry        | Interventional | Phase 4        | Pharmacokinetics |
| 71 | The Canberra Hospital                              | Hospital        | Interventional | Phase 2        | Pharmacokinetics |
| 72 | Chang Gung Memorial Hospital                       | Hospital        | Interventional | Phase 4        | Efficacy         |
| 73 | Darier                                             | Industry        | Interventional | Phase 4        | Safety/Efficacy  |
| 74 | Theravance Biopharma Antibiotics, Inc.             | Industry        | Observational  | Not applicable | Safety/Efficacy  |
| 75 | Grupo de Apoio ao Adolescente e a Crianca com      | Hospital        | Observational  | Not applicable | Pharmacokinetics |
| 76 | Infectopharm Arzneimittel GmbH   J&P Medical R     | Industry        | Observational  | Not applicable | Efficacy         |
| 77 | University of Maryland                             | University      | Interventional | Phase 2        | Safety/Efficacy  |



|    | U  | V                        | W                 | X                 | Y          | Z          | AA               | AB            |                         |
|----|----|--------------------------|-------------------|-------------------|------------|------------|------------------|---------------|-------------------------|
| 1  | 1  | Primary outcome variable | PK data collected | First Receive     | Start Date | Completion | Last Updated     | Last Verified | Results First Received  |
| 2  | 2  | PK                       | PK study design   | July 2, 2015      | Sep-15     | Dec-18     | September 1      | Sep-16        | No Study Results Posted |
| 3  | 3  | Efficacy                 | No PK data        | September 2       | Oct-16     | null       | October 12, 2016 | Oct-16        | No Study Results Posted |
| 4  | 4  | Efficacy                 | No PK data        | September 8       | Sep-16     | null       | September 1      | Sep-16        | No Study Results Posted |
| 5  | 5  | Efficacy                 | No PK data        | May 8, 2012       | May-12     | Apr-18     | June 27, 2016    | Jun-16        | No Study Results Posted |
| 6  | 6  | Efficacy                 | No PK data        | March 2, 2011     | Mar-16     | May-18     | March 24, 2016   | Mar-16        | No Study Results Posted |
| 7  | 7  | Efficacy                 | No PK data        | September 1       | Oct-16     | Mar-19     | October 13, 2016 | Oct-16        | No Study Results Posted |
| 8  | 8  | PK                       | PK study design   | April 4, 2016     | Apr-16     | Sep-16     | April 25, 2016   | Apr-16        | No Study Results Posted |
| 9  | 9  | Efficacy                 | No PK data        | September 2       | Oct-16     | Dec-17     | September 2      | Sep-16        | No Study Results Posted |
| 10 | 10 | Efficacy                 | No PK data        | November 17       | Dec-10     | null       | September 1      | Sep-12        | No Study Results Posted |
| 11 | 11 | Efficacy                 | No PK data        | November 25       | Mar-14     | Jul-16     | December 16      | Nov-15        | No Study Results Posted |
| 12 | 12 | PK                       | Primary PK data   | January 26, 2012  | Apr-12     | Apr-18     | December 10      | Dec-15        | No Study Results Posted |
| 13 | 13 | PK                       | PK study design   | May 18, 2015      | May-12     | null       | November 17      | Nov-15        | No Study Results Posted |
| 14 | 14 | Efficacy                 | No PK data        | December 18       | Dec-07     | Sep-10     | June 3, 2008     | Aug-07        | No Study Results Posted |
| 15 | 15 | Efficacy                 | No PK data        | October 17, 2007  | Nov-07     | Dec-09     | October 18, 2007 | Oct-07        | No Study Results Posted |
| 16 | 16 | PK                       | PK study design   | August 17, 2011   | Nov-11     | Feb-17     | February 4, 2016 | Feb-16        | No Study Results Posted |
| 17 | 17 | PK                       | PK study design   | June 12, 2015     | Nov-15     | Dec-17     | August 1, 2016   | Aug-16        | No Study Results Posted |
| 18 | 18 | Efficacy                 | No PK data        | August 18, 2011   | Aug-11     | Dec-20     | August 30, 2016  | Aug-16        | No Study Results Posted |
| 19 | 19 | PK                       | PK study design   | September 2       | Sep-14     | Nov-16     | October 31, 2016 | Oct-16        | No Study Results Posted |
| 20 | 20 | Efficacy                 | No PK data        | March 23, 2009    | Mar-09     | Oct-12     | June 21, 2011    | Jun-11        | No Study Results Posted |
| 21 | 21 | Safety                   | No PK data        | August 23, 2016   | Aug-16     | Dec-16     | September 1      | Sep-16        | No Study Results Posted |
| 22 | 22 | Efficacy                 | No PK data        | January 3, 2011   | Mar-11     | Jun-15     | May 25, 2015     | May-15        | No Study Results Posted |
| 23 | 23 | Safety                   | Secondary PK data | October 9, 2015   | Mar-15     | Jan-18     | October 31, 2016 | Oct-16        | No Study Results Posted |
| 24 | 24 | Safety                   | Primary PK data   | January 12, 2017  | Jan-17     | Dec-18     | September 8      | Sep-16        | No Study Results Posted |
| 25 | 25 | Safety                   | No PK data        | September 1       | Jul-16     | Sep-18     | October 19, 2016 | Oct-16        | No Study Results Posted |
| 26 | 26 | Efficacy                 | No PK data        | November 17       | Jan-14     | Jul-17     | May 6, 2016      | May-16        | No Study Results Posted |
| 27 | 27 | Efficacy                 | No PK data        | August 21, 2013   | Aug-13     | Aug-15     | August 26, 2013  | Aug-14        | No Study Results Posted |
| 28 | 28 | PK                       | PK study design   | May 11, 2016      | Aug-16     | Oct-22     | May 17, 2016     | May-16        | No Study Results Posted |
| 29 | 29 | Safety                   | Primary PK data   | February 17, 2016 | Jul-16     | Sep-19     | October 6, 2016  | Oct-16        | No Study Results Posted |
| 30 | 30 | Efficacy                 | No PK data        | May 5, 2016       | Jun-16     | Dec-20     | October 7, 2016  | Oct-16        | No Study Results Posted |
| 31 | 31 | Safety                   | No PK data        | November 18       | Dec-13     | Sep-17     | August 1, 2016   | Aug-16        | No Study Results Posted |

|    | U        | V                 | W             | X      | Y      | Z             | AA     | AB                      |
|----|----------|-------------------|---------------|--------|--------|---------------|--------|-------------------------|
| 32 | Efficacy | No PK data        | September 2   | Nov-14 | Dec-18 | December 20   | Dec-15 | No Study Results Posted |
| 33 | PK       | PK study design   | February 18,  | Apr-16 | May-17 | October 19, 2 | Oct-16 | No Study Results Posted |
| 34 | Efficacy | No PK data        | May 8, 2006   | Jan-04 | Dec-13 | February 6, 2 | Feb-12 | No Study Results Posted |
| 35 | PK       | PK study design   | April 1, 2016 | May-16 | Feb-18 | October 21, 2 | Oct-16 | No Study Results Posted |
| 36 | PK       | PK study design   | June 2, 2015  | Jan-16 | Dec-17 | April 18, 201 | Apr-16 | No Study Results Posted |
| 37 | PK       | PK study design   | October 1, 20 | Oct-16 | Oct-17 | October 24, 2 | Oct-16 | No Study Results Posted |
| 38 | PK       | PK study design   | February 24,  | Feb-16 | Feb-17 | March 8, 201  | Mar-16 | No Study Results Posted |
| 39 | Efficacy | No PK data        | February 23,  | Feb-12 | Jul-17 | February 19,  | Feb-16 | No Study Results Posted |
| 40 | PK       | PK study design   | August 23, 20 | Jun-06 | Dec-07 | August 23, 20 | Aug-06 | No Study Results Posted |
| 41 | Efficacy | No PK data        | January 30, 2 | Dec-12 | Dec-13 | February 6, 2 | Feb-13 | No Study Results Posted |
| 42 | Efficacy | No PK data        | September 8   | Feb-16 | Sep-20 | October 3, 20 | Oct-16 | No Study Results Posted |
| 43 | Efficacy | No PK data        | December 22   | Apr-07 | Apr-16 | April 8, 2014 | Apr-14 | No Study Results Posted |
| 44 | Safety   | Secondary PK data | December 31   | Jan-15 | Jan-20 | June 24, 201  | Jun-16 | No Study Results Posted |
| 45 | Efficacy | No PK data        | August 9, 20  | Dec-16 | Dec-19 | September 3   | Jul-16 | No Study Results Posted |
| 46 | Efficacy | No PK data        | July 24, 2016 | Dec-16 | Dec-20 | July 26, 2016 | Jul-16 | No Study Results Posted |
| 47 | Safety   | Secondary PK data | May 25, 2015  | Jul-15 | Oct-17 | October 21, 2 | Oct-16 | No Study Results Posted |
| 48 | Efficacy | No PK data        | November 4,   | Nov-14 | Jul-17 | June 3, 2016  | Jun-16 | No Study Results Posted |
| 49 | Efficacy | No PK data        | February 17,  | Jan-12 | Sep-12 | March 13, 20  | Mar-12 | No Study Results Posted |
| 50 | PK       | PK study design   | August 5, 20  | Aug-14 | Jun-17 | October 20, 2 | Oct-16 | No Study Results Posted |
| 51 | PK       | PK study design   | August 5, 20  | Sep-14 | Sep-17 | March 17, 20  | Mar-16 | No Study Results Posted |
| 52 | Safety   | Secondary PK data | June 16, 201  | Sep-15 | Oct-17 | October 21, 2 | Oct-16 | No Study Results Posted |
| 53 | Efficacy | No PK data        | June 8, 2016  | Jun-16 | Jul-18 | June 23, 201  | Jun-16 | No Study Results Posted |
| 54 | Efficacy | No PK data        | August 1, 20  | Aug-14 | Apr-17 | September 2   | Sep-16 | No Study Results Posted |
| 55 | Efficacy | No PK data        | June 13, 201  | Jun-16 | Nov-16 | June 13, 201  | Jun-16 | No Study Results Posted |
| 56 | Efficacy | No PK data        | May 1, 2016   | Jun-16 | Sep-18 | June 10, 201  | Jun-16 | No Study Results Posted |
| 57 | Efficacy | No PK data        | February 3, 2 | Mar-16 | null   | June 10, 201  | Jun-16 | No Study Results Posted |
| 58 | Safety   | No PK data        | November 10   | Mar-16 | Jan-18 | September 1   | Sep-16 | No Study Results Posted |
| 59 | Efficacy | No PK data        | October 5, 20 | Nov-15 | Feb-17 | October 5, 20 | Oct-16 | No Study Results Posted |
| 60 | Efficacy | No PK data        | May 11, 2015  | Jan-15 | Dec-16 | May 9, 2016   | May-16 | No Study Results Posted |
| 61 | Efficacy | No PK data        | January 4, 20 | Jan-15 | Jan-17 | March 16, 20  | Mar-16 | No Study Results Posted |
| 62 | Efficacy | No PK data        | August 11, 20 | Oct-14 | Feb-17 | June 17, 201  | Jun-16 | No Study Results Posted |



1  
2  
3  
4  
5  
6  
7  
8  
9  
10  
11  
12  
13  
14  
15  
16  
17  
18  
19  
20  
21  
22  
23  
24  
25  
26  
27  
28  
29  
30  
31  
32  
33  
34  
35  
36  
37  
38  
39  
40  
41  
42  
43  
44  
45  
46  
47

|    | U        | V                 | W             | X      | Y      | Z             | AA     | AB                      |
|----|----------|-------------------|---------------|--------|--------|---------------|--------|-------------------------|
| 63 | Efficacy | No PK data        | December 14   | May-10 | Oct-10 | March 18, 20  | Dec-09 | No Study Results Posted |
| 64 | PK       | PK study design   | November 4,   | Apr-15 | Apr-16 | November 4,   | Nov-15 | No Study Results Posted |
| 65 | Safety   | No PK data        | August 17, 20 | Oct-16 | Jul-17 | October 3, 20 | Oct-16 | No Study Results Posted |
| 66 | Efficacy | Secondary PK data | April 7, 2016 | Jul-16 | Mar-18 | May 31, 2016  | May-16 | No Study Results Posted |
| 67 | Efficacy | No PK data        | March 4, 201  | Sep-15 | Oct-16 | October 4, 20 | Oct-16 | No Study Results Posted |
| 68 | Safety   | Secondary PK data | February 23,  | Aug-15 | Oct-17 | October 14, 2 | Oct-16 | No Study Results Posted |
| 69 | PK       | PK study design   | May 7, 2014   | May-14 | Dec-16 | November 4,   | Nov-15 | No Study Results Posted |
| 70 | PK       | PK study design   | December 11   | Dec-14 | Aug-16 | June 24, 201  | Jun-16 | No Study Results Posted |
| 71 | PK       | PK study design   | August 31, 20 | Aug-11 | Jul-12 | September 1   | Aug-11 | No Study Results Posted |
| 72 | Efficacy | No PK data        | November 25   | Aug-10 | Jul-12 | January 14, 2 | Nov-10 | No Study Results Posted |
| 73 | Efficacy | No PK data        | September 3   | Jun-09 | Apr-10 | September 3   | Sep-09 | No Study Results Posted |
| 74 | Efficacy | No PK data        | November 5,   | Nov-14 | Sep-18 | June 29, 201  | Jun-16 | No Study Results Posted |
| 75 | PK       | Primary PK data   | February 24,  | Jan-11 | null   | March 21, 20  | Mar-12 | No Study Results Posted |
| 76 | Efficacy | No PK data        | July 29, 2010 | Aug-10 | null   | February 5, 2 | Feb-16 | No Study Results Posted |
| 77 | Efficacy | Secondary PK data | January 22, 2 | Jul-13 | Dec-21 | May 28, 2015  | May-15 | No Study Results Posted |

|    | AC | AD                 | AE                                                                                                    | AF | AG |
|----|----|--------------------|-------------------------------------------------------------------------------------------------------|----|----|
| 1  | 1  | <b>Primary Com</b> | <b>URL</b>                                                                                            |    |    |
| 2  | 2  | Jul-18             | <a href="https://ClinicalTrials.gov/show/NCT02539407">https://ClinicalTrials.gov/show/NCT02539407</a> |    |    |
| 3  | 3  | Dec-18             | <a href="https://ClinicalTrials.gov/show/NCT02935374">https://ClinicalTrials.gov/show/NCT02935374</a> |    |    |
| 4  | 4  | Sep-18             | <a href="https://ClinicalTrials.gov/show/NCT02899143">https://ClinicalTrials.gov/show/NCT02899143</a> |    |    |
| 5  | 5  | Apr-18             | <a href="https://ClinicalTrials.gov/show/NCT01595529">https://ClinicalTrials.gov/show/NCT01595529</a> |    |    |
| 6  | 6  | Feb-18             | <a href="https://ClinicalTrials.gov/show/NCT02380352">https://ClinicalTrials.gov/show/NCT02380352</a> |    |    |
| 7  | 7  | Jan-19             | <a href="https://ClinicalTrials.gov/show/NCT02891915">https://ClinicalTrials.gov/show/NCT02891915</a> |    |    |
| 8  | 8  | Sep-16             | <a href="https://ClinicalTrials.gov/show/NCT02746276">https://ClinicalTrials.gov/show/NCT02746276</a> |    |    |
| 9  | 9  | Aug-17             | <a href="https://ClinicalTrials.gov/show/NCT02917551">https://ClinicalTrials.gov/show/NCT02917551</a> |    |    |
| 10 | 10 | Jun-13             | <a href="https://ClinicalTrials.gov/show/NCT01243437">https://ClinicalTrials.gov/show/NCT01243437</a> |    |    |
| 11 | 11 | Mar-16             | <a href="https://ClinicalTrials.gov/show/NCT02635191">https://ClinicalTrials.gov/show/NCT02635191</a> |    |    |
| 12 | 12 | Dec-16             | <a href="https://ClinicalTrials.gov/show/NCT01522105">https://ClinicalTrials.gov/show/NCT01522105</a> |    |    |
| 13 | 13 | Dec-17             | <a href="https://ClinicalTrials.gov/show/NCT02456974">https://ClinicalTrials.gov/show/NCT02456974</a> |    |    |
| 14 | 14 | Sep-10             | <a href="https://ClinicalTrials.gov/show/NCT00579956">https://ClinicalTrials.gov/show/NCT00579956</a> |    |    |
| 15 | 15 | null               | <a href="https://ClinicalTrials.gov/show/NCT00545961">https://ClinicalTrials.gov/show/NCT00545961</a> |    |    |
| 16 | 16 | Feb-17             | <a href="https://ClinicalTrials.gov/show/NCT01431326">https://ClinicalTrials.gov/show/NCT01431326</a> |    |    |
| 17 | 17 | Nov-17             | <a href="https://ClinicalTrials.gov/show/NCT02475876">https://ClinicalTrials.gov/show/NCT02475876</a> |    |    |
| 18 | 18 | Dec-20             | <a href="https://ClinicalTrials.gov/show/NCT01420341">https://ClinicalTrials.gov/show/NCT01420341</a> |    |    |
| 19 | 19 | Nov-16             | <a href="https://ClinicalTrials.gov/show/NCT02266706">https://ClinicalTrials.gov/show/NCT02266706</a> |    |    |
| 20 | 20 | Sep-12             | <a href="https://ClinicalTrials.gov/show/NCT00867789">https://ClinicalTrials.gov/show/NCT00867789</a> |    |    |
| 21 | 21 | Dec-16             | <a href="https://ClinicalTrials.gov/show/NCT02879981">https://ClinicalTrials.gov/show/NCT02879981</a> |    |    |
| 22 | 22 | Jun-15             | <a href="https://ClinicalTrials.gov/show/NCT01269541">https://ClinicalTrials.gov/show/NCT01269541</a> |    |    |
| 23 | 23 | Jan-18             | <a href="https://ClinicalTrials.gov/show/NCT02276482">https://ClinicalTrials.gov/show/NCT02276482</a> |    |    |
| 24 | 24 | Dec-18             | <a href="https://ClinicalTrials.gov/show/NCT02663596">https://ClinicalTrials.gov/show/NCT02663596</a> |    |    |
| 25 | 25 | Sep-17             | <a href="https://ClinicalTrials.gov/show/NCT02555059">https://ClinicalTrials.gov/show/NCT02555059</a> |    |    |
| 26 | 26 | Apr-17             | <a href="https://ClinicalTrials.gov/show/NCT02297815">https://ClinicalTrials.gov/show/NCT02297815</a> |    |    |
| 27 | 27 | Dec-14             | <a href="https://ClinicalTrials.gov/show/NCT02224040">https://ClinicalTrials.gov/show/NCT02224040</a> |    |    |
| 28 | 28 | Aug-22             | <a href="https://ClinicalTrials.gov/show/NCT02775968">https://ClinicalTrials.gov/show/NCT02775968</a> |    |    |
| 29 | 29 | Aug-19             | <a href="https://ClinicalTrials.gov/show/NCT02687906">https://ClinicalTrials.gov/show/NCT02687906</a> |    |    |
| 30 | 30 | Dec-19             | <a href="https://ClinicalTrials.gov/show/NCT02783859">https://ClinicalTrials.gov/show/NCT02783859</a> |    |    |
| 31 | 31 | Apr-17             | <a href="https://ClinicalTrials.gov/show/NCT01994993">https://ClinicalTrials.gov/show/NCT01994993</a> |    |    |

|    | AC | AD     | AE                                          | AF | AG |
|----|----|--------|---------------------------------------------|----|----|
| 1  |    |        |                                             |    |    |
| 2  |    |        |                                             |    |    |
| 3  | 32 | Dec-17 | https://ClinicalTrials.gov/show/NCT02258763 |    |    |
| 4  | 33 | May-17 | https://ClinicalTrials.gov/show/NCT02688790 |    |    |
| 5  |    |        |                                             |    |    |
| 6  | 34 | Dec-12 | https://ClinicalTrials.gov/show/NCT00323219 |    |    |
| 7  | 35 | Feb-18 | https://ClinicalTrials.gov/show/NCT02750761 |    |    |
| 8  |    |        |                                             |    |    |
| 9  | 36 | Dec-17 | https://ClinicalTrials.gov/show/NCT02466438 |    |    |
| 10 | 37 | Sep-17 | https://ClinicalTrials.gov/show/NCT02260102 |    |    |
| 11 | 38 | Jun-16 | https://ClinicalTrials.gov/show/NCT02694458 |    |    |
| 12 | 39 | Feb-17 | https://ClinicalTrials.gov/show/NCT01540838 |    |    |
| 13 | 40 | null   | https://ClinicalTrials.gov/show/NCT00368498 |    |    |
| 14 |    |        |                                             |    |    |
| 15 | 41 | Dec-13 | https://ClinicalTrials.gov/show/NCT01785641 |    |    |
| 16 | 42 | Sep-20 | https://ClinicalTrials.gov/show/NCT02554383 |    |    |
| 17 | 43 | Mar-16 | https://ClinicalTrials.gov/show/NCT01265173 |    |    |
| 18 | 44 | Jan-17 | https://ClinicalTrials.gov/show/NCT02335905 |    |    |
| 19 |    |        |                                             |    |    |
| 20 | 45 | Dec-19 | https://ClinicalTrials.gov/show/NCT02922686 |    |    |
| 21 | 46 | Dec-20 | https://ClinicalTrials.gov/show/NCT02848820 |    |    |
| 22 | 47 | Oct-17 | https://ClinicalTrials.gov/show/NCT02475733 |    |    |
| 23 |    |        |                                             |    |    |
| 24 | 48 | May-17 | https://ClinicalTrials.gov/show/NCT02372461 |    |    |
| 25 | 49 | Aug-12 | https://ClinicalTrials.gov/show/NCT01553006 |    |    |
| 26 | 50 | Mar-17 | https://ClinicalTrials.gov/show/NCT02527681 |    |    |
| 27 |    |        |                                             |    |    |
| 28 | 51 | Sep-17 | https://ClinicalTrials.gov/show/NCT02210169 |    |    |
| 29 | 52 | Oct-17 | https://ClinicalTrials.gov/show/NCT02497781 |    |    |
| 30 | 53 | Apr-18 | https://ClinicalTrials.gov/show/NCT02814916 |    |    |
| 31 | 54 | Apr-17 | https://ClinicalTrials.gov/show/NCT02210325 |    |    |
| 32 |    |        |                                             |    |    |
| 33 | 55 | Nov-16 | https://ClinicalTrials.gov/show/NCT02801370 |    |    |
| 34 | 56 | Aug-18 | https://ClinicalTrials.gov/show/NCT02760420 |    |    |
| 35 | 57 | Aug-18 | https://ClinicalTrials.gov/show/NCT02678195 |    |    |
| 36 | 58 | Dec-17 | https://ClinicalTrials.gov/show/NCT02605122 |    |    |
| 37 |    |        |                                             |    |    |
| 38 | 59 | Feb-17 | https://ClinicalTrials.gov/show/NCT02570490 |    |    |
| 39 | 60 | Dec-16 | https://ClinicalTrials.gov/show/NCT02443285 |    |    |
| 40 | 61 | Jan-17 | https://ClinicalTrials.gov/show/NCT02334124 |    |    |
| 41 |    |        |                                             |    |    |
| 42 | 62 | Feb-17 | https://ClinicalTrials.gov/show/NCT02218372 |    |    |

1  
2  
3  
4  
5  
6  
7  
8  
9  
10  
11  
12  
13  
14  
15  
16  
17  
18  
19  
20  
21  
22  
23  
24  
25  
26  
27  
28  
29  
30  
31  
32  
33  
34  
35  
36  
37  
38  
39  
40  
41  
42  
43  
44  
45  
46  
47

|    | AC     | AD                                                                                                            | AE | AF | AG |
|----|--------|---------------------------------------------------------------------------------------------------------------|----|----|----|
| 63 | Jul-10 | <a href="https://ClinicalTrials.gov/show/NCT01032499">https://ClinicalTrials.gov/show/NCT01032499</a>         |    |    |    |
| 64 | Feb-16 | <a href="https://ClinicalTrials.gov/show/NCT02598362">https://ClinicalTrials.gov/show/NCT02598362</a>         |    |    |    |
| 65 | Mar-17 | <a href="https://ClinicalTrials.gov/show/NCT02878031">https://ClinicalTrials.gov/show/NCT02878031</a>         |    |    |    |
| 66 | Dec-17 | <a href="https://ClinicalTrials.gov/show/NCT02790996">https://ClinicalTrials.gov/show/NCT02790996</a>         |    |    |    |
| 67 | Oct-16 | <a href="https://ClinicalTrials.gov/show/NCT02712307">https://ClinicalTrials.gov/show/NCT02712307</a>         |    |    |    |
| 68 | Oct-17 | <a href="https://ClinicalTrials.gov/show/NCT02424734">https://ClinicalTrials.gov/show/NCT02424734</a>         |    |    |    |
| 69 | Dec-16 | <a href="https://ClinicalTrials.gov/show/NCT02134301">https://ClinicalTrials.gov/show/NCT02134301</a>         |    |    |    |
| 70 | Aug-16 | <a href="https://ClinicalTrials.gov/show/NCT02013141">https://ClinicalTrials.gov/show/NCT02013141</a>         |    |    |    |
| 71 | Jul-12 | <a href="https://ClinicalTrials.gov/show/NCT01427842">https://ClinicalTrials.gov/show/NCT01427842</a>         |    |    |    |
| 72 | Jun-11 | <a href="https://ClinicalTrials.gov/show/NCT01278017">https://ClinicalTrials.gov/show/NCT01278017</a>         |    |    |    |
| 73 | Feb-10 | <a href="https://ClinicalTrials.gov/show/NCT00988026">https://ClinicalTrials.gov/show/NCT00988026</a>         |    |    |    |
| 74 | Jun-18 | <a href="https://ClinicalTrials.gov/show/NCT02288234">https://ClinicalTrials.gov/show/NCT02288234</a>         |    |    |    |
| 75 | null   | <a href="https://ClinicalTrials.gov/show/NCT01304459">https://ClinicalTrials.gov/show/NCT01304459</a>         |    |    |    |
| 76 | Dec-16 | <a href="https://ClinicalTrials.gov/show/NCT01173575">https://ClinicalTrials.gov/show/NCT01173575</a>         |    |    |    |
| 77 | Dec-19 | <a href="https://clinicaltrials.gov/ct2/show/NCT01778634">https://clinicaltrials.gov/ct2/show/NCT01778634</a> |    |    |    |

# BMJ Open

## A global shortage of neonatal and pediatric antibiotic trials: a narrative review.

|                                 |                                                                                                                                                                                                                                                                                                                                                                                                                                                                                                                                                                                                                                                                                                                                                                                                     |
|---------------------------------|-----------------------------------------------------------------------------------------------------------------------------------------------------------------------------------------------------------------------------------------------------------------------------------------------------------------------------------------------------------------------------------------------------------------------------------------------------------------------------------------------------------------------------------------------------------------------------------------------------------------------------------------------------------------------------------------------------------------------------------------------------------------------------------------------------|
| Journal:                        | <i>BMJ Open</i>                                                                                                                                                                                                                                                                                                                                                                                                                                                                                                                                                                                                                                                                                                                                                                                     |
| Manuscript ID                   | bmjopen-2017-016293.R2                                                                                                                                                                                                                                                                                                                                                                                                                                                                                                                                                                                                                                                                                                                                                                              |
| Article Type:                   | Research                                                                                                                                                                                                                                                                                                                                                                                                                                                                                                                                                                                                                                                                                                                                                                                            |
| Date Submitted by the Author:   | 25-Jul-2017                                                                                                                                                                                                                                                                                                                                                                                                                                                                                                                                                                                                                                                                                                                                                                                         |
| Complete List of Authors:       | Thompson, Georgina; St George's University of London, Infection and Immunity; University of Exeter Medical School<br>Barker, Charlotte; St George's University of London, Infection and Immunity; University College London Institute of Child Health<br>Folgori, Laura; St George's University of London, Paediatric Infectious Diseases Research Group<br>Bielicki, Julia; St George's University London, Division of Clinical Sciences; University of Basel Children's Hospital<br>Bradley, John; University of California San Diego School of Medicine, Department of Pediatrics<br>Lutsar, Irja; University of Tartu, Department of Medical Microbiology<br>sharland, mike; St George's University of London, Infection and Immunity; St Georges Hospital, Paediatric Infectious Diseases Unit |
| <b>Primary Subject Heading</b>: | Paediatrics                                                                                                                                                                                                                                                                                                                                                                                                                                                                                                                                                                                                                                                                                                                                                                                         |
| Secondary Subject Heading:      | Infectious diseases                                                                                                                                                                                                                                                                                                                                                                                                                                                                                                                                                                                                                                                                                                                                                                                 |
| Keywords:                       | Paediatric infectious disease & immunisation < PAEDIATRICS, INFECTIOUS DISEASES, PAEDIATRICS                                                                                                                                                                                                                                                                                                                                                                                                                                                                                                                                                                                                                                                                                                        |
|                                 |                                                                                                                                                                                                                                                                                                                                                                                                                                                                                                                                                                                                                                                                                                                                                                                                     |

SCHOLARONE™  
Manuscripts

# A global shortage of neonatal and pediatric antibiotic trials: rapid review.

G. Thompson<sup>1,2</sup>, C.I.S. Barker<sup>1,3,4</sup>, L. Folgori<sup>1</sup>, J.A. Bielicki<sup>1,5</sup>, J. Bradley<sup>6,7</sup>, I. Lutsar<sup>8</sup>, M. Sharland<sup>1,4</sup>

<sup>1</sup>Paediatric Infectious Diseases Research Group, Institute for Infection and Immunity, St George's University of London, London, UK

<sup>2</sup>University of Exeter, Exeter, UK

<sup>3</sup>Inflammation, Infection and Rheumatology Section, UCL Great Ormond Street Institute of Child Health, 30 Guilford Street, London, UK

<sup>4</sup>St George's University Hospitals NHS Foundation Trust, Blackshaw Road, London, UK

<sup>5</sup>Paediatric Pharmacology and Pharmacometrics, University of Basel Children's Hospital, Basel, Switzerland

<sup>6</sup>Department of Pediatrics, School of Medicine, University of California San Diego, CA, United States

<sup>7</sup>Rady Children's Hospital San Diego, San Diego, CA, United States

<sup>8</sup>Department of Medical Microbiology, University of Tartu, Tartu, Estonia

## Corresponding author

Georgina Thompson

Paediatric Infectious Diseases Research Group

Institute for Infection and Immunity

St George's, University of London

Jenner Wing, Level 2, Room 2.216F, Mail Point J2C

London SW17 0RE

Telephone: 020 8725 5382

Email: [gt274@exeter.ac.uk](mailto:gt274@exeter.ac.uk)

**Word count:** 2392

## ABSTRACT

**Objectives:** There have been few clinical trials (CTs) on antibiotics which inform neonatal and pediatric drug labelling. The rate of unlicensed and off-label prescribing in pediatrics remains high. It is unclear whether the current neonatal and pediatric antibiotic research pipeline is adequate to inform optimal drug dosing. Using the ClinicalTrials.gov registry, this review aims to establish the current global status of antibiotic CTs in children up to 18 years of age.

**Results:** 76 registered open CTs of antibiotics in children were identified globally; 23 (30%) were recruiting newborns (8 of which (11%) included preterm neonates), 52 (68%) infants and toddlers, 58 (76%) children, and 54 (71%) adolescents. The majority of registered trials were late phase (10 (15%) Phase 3 and 23 (35%) Phase 4/pharmacovigilance). Two-thirds were sponsored by non-profit organisations (n=50, 66%), compared to 26 (34%) by pharmaceutical companies. A greater proportion of non-profit funded trials were efficacy-based strategic trials (n= 34, 68%), in comparison to industry-led trials, which were most often focused on safety or pharmacokinetic data (n=17, 65%). Only 2 of the 37 antibiotics listed on the May 2016 Pew Charitable Trusts antibiotic development pipeline, currently being studied in adults, appear to be currently recruiting in open pediatric CTs.

**Conclusions:** This review highlights that very few pediatric antibiotic CTs are being conducted globally, especially in neonates. There is a striking disparity noted between antibiotic drug development programmes in adults and children.

### Strengths and limitations of this study

- A narrative literature review of registered clinical trials in children.
- Explicit reproducible methodology.
- Search strategy limited to ClinicalTrials.gov and EudraCT. Entirety of clinical research in this field might not have been captured.
- Search strategy was limited to open clinical trials. Active but not yet recruiting trials were not captured.

## INTRODUCTION

Widespread unlicensed and off-label prescribing in pediatrics persists – as high as 11% and 46%, respectively – yet the paucity of clinical research involving children that is conducted to inform optimal drug dosing, licensing and labelling remains a problem.[1] For certain medicines, drug efficacy can be extrapolated from adult data provided that the pathology and drug exposure are the same, or sufficiently similar in children as in adults.[2,3]. Although differences in drug pharmacokinetics (PK) in neonates and children can lead to adverse reactions that are not seen in adult populations, these are very rare.[4] Suboptimal antibiotic dosing, including under- and over-

1  
2  
3 dosing, can lead to toxicity, treatment failure, and may drive antimicrobial resistance by encouraging  
4 selection pressures on drug-resistant strains of bacteria.[5]  
5  
6

7  
8 Since antibiotics are the medicines most commonly prescribed for children, it is important to  
9 maximize our understanding of their PK profiles to help determine optimal drug dosing and  
10 ultimately to improve outcomes.[6] In the last decade several initiatives have been established to  
11 encourage pediatric medicines research, bridging the gap between adult and pediatric drug  
12 development plans. Such initiatives include the Pediatric Regulation (Pediatric Investigation Plans  
13 (PIPs), introduced by the European Medicines Agency (EMA),[7] and Pediatric Study Plans (PSPs),  
14 by the U.S. Food and Drug Administration (FDA)).[8] Despite this, there have been few advances in  
15 antibiotic development for this population.[9]  
16  
17  
18  
19  
20

21 The global status of clinical research on antibiotics in pediatrics is unknown. Using registered  
22 records of clinical trials (CTs) on *ClinicalTrials.gov*, this review aims (i) to summarise the current  
23 global status of registered antibiotic research in children and neonates, and (ii) to stimulate  
24 discussion and collaboration among the relevant stakeholders on the neglect of antibiotic research  
25 in children.  
26  
27  
28  
29

## 30 **METHODS**

### 31 **Data sources**

32 The *ClinicalTrials.gov* registry (last accessed 8<sup>th</sup> November 2016) is an international platform for the  
33 registration of CTs. It is a web-based registry, developed in 2000 by the National Institutes of Health  
34 (NIH) and the FDA, to which trials from 50 states and 163 countries around the world are registered.  
35 Information provided for each trial is updated periodically by the trial's sponsoring organisation. The  
36 database has a specific child filter, which uses a key word paradigm to select all registered trials  
37 recruiting patients/participants up to 18 years of age.  
38  
39  
40  
41  
42  
43  
44  
45

### 46 **Study selection**

47 Our records were identified using suitable key word searches, in which the final search terms were  
48 (antimicrobial\* OR antibiotic\* OR anti-infective agent\*) AND Child AND Open Studies. All identified  
49 trials were filtered manually using inclusion and exclusion criteria. Interventional and observational  
50 trials on antimicrobials recruiting children up to 18 years of age were considered eligible for  
51 inclusion. No specific temporal filter was applied since only open or ongoing clinical trials were of  
52 interest. The following records, which were not investigating one or more antibiotics, were excluded:  
53 trials of antiseptics, antifungals, antiprotozoals, antivirals, and pro- or pre- biotics. The following  
54 records, which were investigating an antibiotic were excluded: trials involving tuberculosis, malaria,  
55  
56  
57  
58  
59  
60



1  
2  
3 cystic fibrosis, HIV, febrile neutropenic patients, topical or inhalational treatments, prophylactic  
4 antibiotics, or records investigating alternative use for antibiotics (for example as an anti-  
5 inflammatory agent).  
6  
7

8  
9 The searches were conducted by GT. All eligible records were identified via manual filtering by GT  
10 CB, LF and MS, and any disagreements regarding inclusion and exclusion of records were resolved  
11 through discussion.  
12  
13

### 14 **Data extraction**

15 The following information was collected from the included records: unique NCT number, recruitment  
16 status, study design, trial phase, study sponsor, age group and sex eligibility, clinical indication,  
17 geographic region of recruitment, antibiotic being investigated, and endpoint classification.  
18 Outcomes were categorised as safety, efficacy or PK. Economic setting (based on geographic  
19 region of recruitment) was classified using The World Bank classification to differentiate between  
20 Low Income Countries (LICs), Lower Middle Income Countries (LMICs), Upper Middle Income  
21 Countries (UMICs), and High Income Countries (HICs).[10]  
22  
23  
24  
25  
26  
27  
28

29 The specific class of antibiotic studied in each trial was identified and classified using the World  
30 Health Organisation (WHO) ATC/DDD index.[11] To investigate whether novel antibiotics are being  
31 studied in pediatric populations, the antibiotics currently studied in children were compared with the  
32 *Pew Charitable Trusts Antibiotics Currently in Clinical Development* pipeline, which identifies novel  
33 antibiotics currently under development for the U.S. market.[12]  
34  
35  
36  
37  
38  
39  
40

## 41 **RESULTS**

42 Our search identified 1056 records. 603 records were excluded on title because they were studies  
43 not involving an antimicrobial. 453 records were investigating one or more antimicrobials and  
44 recruiting children below 18 years of age. Among the 195 trials investigating antibiotics, 76 fulfilled  
45 our inclusion and exclusion criteria and were included in the final analysis. Reasons for exclusion  
46 are summarised in Figure 1. Details of included studies can be found in Supplementary file 1.  
47  
48  
49  
50

51 All 76 CTs identified were open as of 8<sup>th</sup> November 2016, and 63 (83%) of these were recognised  
52 as recruiting participants on this date (Table 1). All trials were recruiting both male and female  
53 participants.  
54  
55  
56

57 **Table 1.** Characteristics of clinical trials.  
58  
59  
60

| Characteristic                 | Category                                   | Number of studies, n (%) |
|--------------------------------|--------------------------------------------|--------------------------|
| <b>Age group</b>               | Preterm neonates                           | 1 (1) <sup>a</sup>       |
|                                | Neonates (total)                           | 23 (30)                  |
|                                | Infants and toddlers                       | 52 (68)                  |
|                                | Children                                   | 58 (76)                  |
|                                | Adolescents                                | 54 (71)                  |
| <b>Recruitment status</b>      | Recruiting                                 | 63 (83)                  |
|                                | Not yet recruiting                         | 13 (17)                  |
| <b>Study design</b>            | Interventional                             | 66 (87)                  |
|                                | Observational                              | 10 (13)                  |
| <b>Trial phase<sup>b</sup></b> | Phase 1                                    | 10 (15)                  |
|                                | Phase 1-2                                  | 1 (2)                    |
|                                | Phase 2                                    | 9 (14)                   |
|                                | Phase 2-3                                  | 3 (5)                    |
|                                | Phase 3                                    | 10 (15)                  |
|                                | Phase 4                                    | 23 (39)                  |
|                                | Not specified                              | 10 (15)                  |
| <b>Sponsor</b>                 | Industry                                   | 26 (34)                  |
|                                | Non-profit                                 | 50 (66)                  |
| <b>Geographic region</b>       | Africa                                     | 8 (11)                   |
|                                | Asia                                       | 16 (21)                  |
|                                | Europe                                     | 22 (29)                  |
|                                | Latin America                              | 6 (8)                    |
|                                | North America                              | 34 (45)                  |
|                                | Oceania                                    | 5 (7)                    |
| <b>Antibiotic class</b>        | J01A Tetracycline                          | 4 (5)                    |
|                                | J01C Beta-lactam, Penicillin               | 25 (33)                  |
|                                | J01D Other Beta-lactam                     | 22 (29)                  |
|                                | J01E Sulfonamides and trimethoprim         | 7 (9)                    |
|                                | J01F Macrolide, Lincosamide, Streptogramin | 14 (18)                  |
|                                | J01G Aminoglycoside                        | 2 (3)                    |
|                                | J01M Quinolone                             | 8 (11)                   |
|                                | J01X Other antibiotic classes <sup>c</sup> | 21 (28)                  |
|                                | J01 Not specified                          | 2 (3)                    |

Totals for Age group, Geographic region, and Antibiotic class do not add up to total number of clinical trials (76) as some trials contributed to more than one sub group.

<sup>a</sup> 7 further trials mentioned inclusion of preterm babies in the inclusion criteria.

<sup>b</sup> Trial phase % based on percentage of interventional trials.

<sup>c</sup> J01X includes glycopeptides, polymyxins, imidazole and nitrofurantoin derivatives.

### Age group

Only 23 of the 76 trials (30%) were recruiting newborns (0 to 28 days). One of these 23 trials focused solely on recruiting preterm newborns (a further 7 CTs mentioned inclusion of preterm newborns in inclusion criteria). Of the remaining records, 52 (68%) were recruiting infants and toddlers (28 days to 23 months), 58 (76%) children (2 to 11 years), and 54 (71%) adolescents (11

up to 18 years). 29 (38%) trials did not focus solely on the recruitment of children or neonates, with age ranges also spanning across adult populations.

### Study type

Interventional trials were most frequently identified (n=66, 87%) with only 10 (13%) observational trials noted. Of the interventional trials, the majority were in the later stages of development; 10 (13%) in Phase 1, 1 (2%) between Phase 1 and 2, 9 (14%) in Phase 2, 3 (5%) between Phase 2 and 3, 10 (15%) in Phase 3 and 23 (35%) in Phase 4. In 10 (15%) cases, a trial phase was not specified.

### Sponsor and Endpoint Classification

Fifty trials (66%) were sponsored by non-profit organisations (being university, hospital or government funded), and 26 sponsored by industry (34%). The endpoint classification of the majority of trials (n=43, 57%) was reported as efficacy (Table 2). A greater proportion (n=34, 68%) of non-profit studies measured the efficacy of the drugs as the primary endpoint, with less emphasis on collection of PK or safety data (n=16, 32%). In comparison pharmaceutical-led trials focussed on early PK and safety studies over drug efficacy (n=17, 65% vs. n=9, 35% respectively).

**Table 2.** Clinical trial endpoint classification of identified clinical trials stratified by trial sponsor. Endpoint classification determined by planned primary outcomes.

| Endpoint classification | Industry | Non-profit | Total (%) |
|-------------------------|----------|------------|-----------|
| Efficacy                | 9        | 34         | 43 (57)   |
| Safety                  | 10       | 2          | 12 (16)   |
| PK                      | 7        | 14         | 21 (28)   |

### Geographic region

The most frequently recruiting geographic region was North America (n=34, 45%). 22 (29%) trials recruiting in Europe and 16 (21%) in Asia were identified, 6 (8%) in Latin America, 8 (11%) in Africa, and 5 (7%) in Oceania. Most trials were recruiting in HICs (n=54, 71%), with fewer trials recruiting in LICs (n=4, 5%), LMICs (n=4, 5%), UMICs (n=11, 14%) or a combination of UMICs and HICs (n=3, 4%).

### Indication

The most common treatment indications investigated were lower respiratory tract infection (n=12, 16%) and sepsis (n=11, 14%), followed by upper respiratory tract infection (n=8, 11%), intra-

1  
2  
3 abdominal infection (IAI) (n=8, 11%), urinary tract infection (UTI) (n=7, 9%), complicated skin and  
4 soft tissue infection (cSSTI) (n=6, 8%), CNS (central nervous system) infection (n=3, 4%), and bone  
5 and joint infection (n=1, 1%) (Table 3).  
6  
7

### 8 9 **Antibiotic class**

10 The majority of antibiotics being investigated were beta-lactams (n=47, 62%), followed by other  
11 antibiotic classes (J01X, including vancomycin, telavancin and dalbavancin) (n=21, 28%), and  
12 macrolides or lincosamides (J01F) (n=14, 18%). Very few trials were investigating tetracyclines  
13 (J01A) (n=4, 5%), sulphonamides and trimethoprim (J01E) (n=7, 9%), aminoglycosides (J01G)  
14 (n=2, 3%), or quinolones (J01M) (n=8, 11%). 2 CTs (3%) did not specify the class of antibiotic being  
15 investigated. 16 (21%) trials were investigating more than one antibiotic; these trials counted  
16 towards more than one J01 category. The breakdown of J01 categories, as per WHO ATC/DDD  
17 classification,[11] is described in Table 1.  
18  
19  
20  
21  
22

### 23 24 **Antibiotic pipeline**

25 Of the 37 antibiotics listed in the May 2016 edition of the Pew Charitable Trusts Antibiotic Pipeline  
26 (last accessed 10<sup>th</sup> June 2016),[12] as noted by the EMA Opinions and Decisions on Pediatric  
27 Investigation Plans, 5 had an agreed PIP: Imipenem/Cilastatin+Relebactam, Cadazolid,  
28 Carbavance (Meropenem+Vaborbactam), Eravacycline, and Solithromycin.[8] As of 8<sup>th</sup> November  
29 2016, our search found that only 2 of these 37 antibiotics listed (Carbavance and Solithromycin)  
30 were currently being investigated in 1 and 2 on-going CTs in pediatric patients, respectively (Table  
31 4). A PIP was agreed for Carbavance in 2015 for treatment of Gram-negative infections, and for  
32 Solithromycin in 2016 for the treatment of gonococcal infection, and later for treatment of anthrax,  
33 tularaemia, and bacterial pneumonia. PIPs were agreed in 2015 for treatment of UTI and  
34 complicated IAI with Eravacycline, and in 2016 for treatment of Clostridium difficile infection with  
35 Cadazolid and Gram-negative bacterial infections with Imipenem/Cilastatin+Relebactam.[13] Despite  
36 this, we could not identify any registered trials of these antibiotics in our search.  
37  
38  
39  
40  
41  
42  
43  
44  
45  
46  
47  
48  
49  
50  
51  
52  
53  
54  
55  
56  
57  
58  
59  
60

**Table 3.** Clinical indication of identified clinical trials stratified by age group being recruited.

| Indication                             | Total (%) | Age group                     |                       |                      |          |             |
|----------------------------------------|-----------|-------------------------------|-----------------------|----------------------|----------|-------------|
|                                        |           | Preterm neonates <sup>a</sup> | Neonates <sup>b</sup> | Infants and toddlers | Children | Adolescents |
| Unspecified Bacterial Infection        | 18 (24)   | -                             | 11                    | 15                   | 15       | 14          |
| Lower Respiratory Tract Infection      | 12 (16)   | 1                             | 3                     | 12                   | 13       | 5           |
| Sepsis                                 | 11 (14)   | -                             | 6                     | 9                    | 9        | 11          |
| Upper Respiratory Tract                | 8 (11)    | -                             | 1                     | 5                    | 9        | 7           |
| Intra-abdominal Infection              | 8 (11)    | -                             | 3                     | 5                    | 5        | 7           |
| Urinary Tract Infection                | 7 (9)     | -                             | 2                     | 6                    | 7        | 6           |
| Skin and Soft Tissue Infection         | 6 (8)     | -                             | 3                     | 4                    | 4        | 8           |
| CNS (central nervous system) infection | 3 (4)     | -                             | 1                     | 4                    | 4        | 4           |
| Bone and Joint Infection               | 1 (1)     | -                             | -                     | 1                    | 1        | 1           |
|                                        |           | 1                             | 30                    | 61                   | 67       | 63          |

Age group totals do not add up to total number of clinical trials (76) as some trials contributed to more than one age group.

<sup>a</sup> studies conducted using preterm neonates exclusively.

<sup>b</sup> refers to total number of preterm and term neonates.

**Table 4.** Comparison of antibiotic development pipeline in adults and children. Adapted from Pew Charitable Trusts “Antibiotics currently in clinical development” pipeline (last accessed October 2016).[12]

| Antibiotic | Phase   | Manufacturer   | Indication          | Drug development in Adults | Pediatric Investigation Plan for drug development in Children | Number of open clinical trials in children |
|------------|---------|----------------|---------------------|----------------------------|---------------------------------------------------------------|--------------------------------------------|
| WCK 4873   | Phase 1 | Wockhardt Ltd. | Bacterial infection | ✓                          | -                                                             | -                                          |

|                       |         |                                                  |                                              |   |   |   |
|-----------------------|---------|--------------------------------------------------|----------------------------------------------|---|---|---|
| MGB – BP – 3          | Phase 1 | MGB Pharma Ltd.                                  | <i>Clostridium difficile</i> infection       | ✓ | - | - |
| OP0595                | Phase 1 | Meiji Seika Pharma Co.<br>Fedora Pharmaceuticals | Bacterial infection                          | ✓ | - | - |
| BAL30072              | Phase 1 | Basilea Pharmaceuticals                          | Multidrug resistant Gram negative infections | ✓ | - | - |
| CRS3123               | Phase 1 | Crestone Inc.                                    | <i>Clostridium difficile</i> infection       | ✓ | - | - |
| LCB01 – 0371          | Phase 1 | Legochem Biosciences Inc.                        | Bacterial infection                          | ✓ | - | - |
| TD – 1607             | Phase 1 | Theravance Biopharma Inc.                        | Acute skin infection, HAP, VAP, bacteraemia  | ✓ | - | - |
| WCK 2349              | Phase 1 | Wockhardt Ltd.                                   | Bacterial infection                          | ✓ | - | - |
| WCK 771               | Phase 1 | Wockhardt Ltd.                                   | Bacterial infection                          | ✓ | - | - |
| Zidebactam+Cefepime   | Phase 1 | Wockhardt Ltd.                                   | cUTI, HAP, VAP                               | ✓ | - | - |
| TP – 271              | Phase 1 | Tetraphase Pharmaceuticals Inc.                  | CAP                                          | ✓ | - | - |
| Aztreonam – Avibactam | Phase 2 | Astrazeneca PLC<br>Allergan PLC                  | cIAI                                         | ✓ | - | - |

|                       |         |                                  |                                                                                    |   |   |   |
|-----------------------|---------|----------------------------------|------------------------------------------------------------------------------------|---|---|---|
| MRX – 1               | Phase 2 | MicuRx Pharmaceuticals Inc.      | Acute skin infection (systemic)                                                    | ✓ | - | - |
| Debio 1450            | Phase 2 | Debiopharm International SA      | Acute skin infection, Staphylococcus spp. associated osteomyelitis                 | ✓ | - | - |
| ETX0914               | Phase 2 | Entasis Therapeutics Inc.        | Uncomplicated gonorrhoea                                                           | ✓ | - | - |
| POL7080               | Phase 2 | Polyphor Ltd.                    | Pseudomonas spp. associated VAP, lower respiratory tract infection, bronchiectasis | ✓ | - | - |
| Brilacidin            | Phase 2 | Cellceutix Corporation           | Acute skin infection (systemic)                                                    | ✓ | - | - |
| Ceftaroline+Avibactam | Phase 2 | AstraZeneca PLC<br>Allergan PLC  | Bacterial infection                                                                | ✓ | - | - |
| CG400549              | Phase 2 | Crystal Genomics Inc.            | Acute skin infection, osteomyelitis                                                | ✓ | - | - |
| Finafloxacin          | Phase 2 | MerLion Pharmaceuticals Pte Ltd. | cUTI, cIAI, acute skin infection, pyelonephritis                                   | ✓ | - | - |
| Geptidacin            | Phase 2 | GlaxoSmithKline PLC              | cUTI, CAP, uncomplicated urogenital gonorrhoea                                     | ✓ | - | - |
| Nemonoxacin           | Phase 2 | TaiGen Biotechnology Co. Ltd.    | CAP, acute skin infection, diabetic foot                                           | ✓ | - | - |
| Ramoplanin            | Phase 2 | Nanotherapeutics Inc.            | Prevent recurrent <i>Clostridium difficile</i> infection                           | ✓ | - | - |

|                                    |         |                                   |                                                                                           |   |                |   |
|------------------------------------|---------|-----------------------------------|-------------------------------------------------------------------------------------------|---|----------------|---|
| Ridinilazole                       | Phase 2 | Summet Therapeutics Inc.          | <i>Clostridium difficile</i>                                                              | ✓ | -              | - |
| Zabofloxacin                       | Phase 3 | Dong Wha Pharmaceuticals Co. Ltd. | CAP                                                                                       | ✓ | -              | - |
| S – 649266                         | Phase 3 | Shionogi Inc.                     | HAP, VAP, cUTI, bloodstream infection                                                     | ✓ | -              | - |
| Omadacycline                       | Phase 3 | Paratek Pharmaceuticals Inc.      | CAP, cUTI, acute skin infection                                                           | ✓ | -              | - |
| Lefamulin                          | Phase 3 | Nabriva Therapeutics AC           | CAP, HAP, VAP, acute skin infection, osteomyelitis, prosthetic joint infections           | ✓ | -              | - |
| Imipenem / Cilastatin+Relebactam   | Phase 3 | Merck & Co. Inc.                  | cUTI, cIAI, HAP, VAP, acute pyelonephritis                                                | ✓ | ✓              | - |
| Iclaprim                           | Phase 3 | Motif Bio PLC                     | HAP, acute skin infection                                                                 | ✓ | -              | - |
| Cadazolid                          | Phase 3 | Actelion Pharmaceuticals Ltd.     | <i>Clostridium difficile</i>                                                              | ✓ | ✓              | - |
| Taksta (fusidic acid)              | Phase 3 | Cempra Inc.                       | Acute skin infection, prosthetic joint infection                                          | ✓ | -              | - |
| Carbavance (Meropenem+Vaborbactam) | Phase 3 | Rempex Pharmaceuticals Inc.       | cUTI, cIAI, HAP, VAP, febrile neutropenia, bacteraemia, acute pyelonephritis <sup>a</sup> | ✓ | ✓              | 1 |
| Delafloxacin (Baxdela)             | Phase 3 | Melinta Therapeutics Inc.         | Acute skin infections, CAP, cUTI                                                          | ✓ | Waiver granted | - |
| Eravacycline                       | Phase 3 | Tetraphase Pharma Inc.            | cIAI and cUTI                                                                             | ✓ | ✓              | - |



|               |         |               |                                                                              |   |   |   |
|---------------|---------|---------------|------------------------------------------------------------------------------|---|---|---|
| Plazomicin    | Phase 3 | Achaogen Inc. | cUTI, HAP, VAP, cIAI, catheter-associated bloodstream infection <sup>a</sup> | ✓ | - | - |
| Solithromycin | Phase 3 | Cempra Inc.   | CAP, uncomplicated urogenital gonorrhoea, urethritis                         | ✓ | ✓ | 2 |

CAP, Community-acquired pneumonia; cIAI, complicated Intra-abdominal Infection; UTI, complicated Urinary Tract Infection; HAP, hospital-acquired pneumonia; VAP, ventilator-acquired pneumonia.

<sup>a</sup> target carbapenem resistant Enterobacteriaceae

## DISCUSSION

Our search identified 76 clinical trials investigating one or more antibiotics recruiting children between birth and 18 years of age. This is low in comparison to the number of on-going trials in adults, despite children representing nearly a quarter of the global population.[14,15] A review of completed CTs in the U.S. between 2000 and 2010 identified a total of 4078 adult trials compared to just 294 that had recruited children.[16] In our study, the lack of trials recruiting neonates is striking. Just 23 of the 76 trials identified were recruiting neonates and just 8 CTs globally were recruiting preterm neonates. There are broadly two types of pediatric trials conducted globally: pharmaceutical-led Phase 1/2 PK and safety trials (n=17) in the HIC setting, or investigator-led, often pragmatic, late phase efficacy trials in the LMIC setting (n=34), with a greater proportion of on-going trials being sponsored by non-profit organisations over industry (66% compared to 34%). As of April 2016, there were 17 antibiotic PIPs agreed by the EMA,[8] covering a range of indications, most commonly cSSTI, complicated IAI (cIAI), and complicated UTI (cUTI).[13] In contrast, treatments for respiratory and systemic infections, the most common clinical indications for antibiotics in pediatrics, are not currently being evaluated.[14] Thirty-seven antibiotics are being developed in adults, yet to our knowledge just 2 of these are being studied in children. Some classes of antibiotics that may be of higher risk for children (tetracyclines and fluoroquinolones) may not be pursued as aggressively for pediatric approvals due to well-recognized issues of toxicity, particularly when safer alternatives are widely available. Given that Gram-negative sepsis is a growing problem in neonates, with a significant increase in the proportion of multi-resistant Gram-negative pathogens,[15] the substantial lag time between the submission date (for PIP or waiver) and declared completion date of PK studies in adults is a real concern; however, there is value in generating substantial safety data in adults prior to exposing children and newborns to potentially toxic new agents.

In 2013, a similar review of European pediatric clinical trials identified 31 trials of antibiotics approved for adults by the EMA in 2000 that were recruiting children in Europe (compared to the 22 that we identified). They included both published and ongoing trials, which likely accounts for the higher number of trials reported. They also found a very small proportion of neonatal trials (2 of 31), as well as a greater proportion of efficacy-based trials.[9] A review of interventional trials registered with *ClinicalTrials.gov* between 2007 and 2010 found that only 17% had recruited children below 18 years of age.[17] A similar review of antimicrobial CTs conducted in the U.S. between 2000 and 2012 reported that just 5% had recruited only children compared to 74% that recruited only adults, and that, as we have found, the trials were sponsored primarily by non-profit organisations (60% versus 30% by industry).[16] In our search of global trials, 39% of registered CTs reported collection of PK data in comparison to the 24% identified in a 2009 paediatric PK research review.[18]

1  
2  
3 The search strategy used has clear limitations. Since the search was limited to clinical trials  
4 registered with *ClinicalTrials.gov*, it is possible that other open or on-going trials registered with  
5 alternative platforms (for example, the WHO International Clinical Trials Registry Platform [ICTRP])  
6 will have been missed. Together with *ClinicalTrials.gov* these could help to establish the entirety of  
7 current clinical research in this field. We did however search EudraCT, and found no further studies  
8 beyond those captured on *ClinicalTrials.gov*. Our search was also limited to open CTs, thereby  
9 missing active but not yet recruiting trials, and those that had already closed to recruitment. The  
10 information recorded for each trial registered with *ClinicalTrials.gov* is updated by the trial  
11 investigators, and therefore relies on them to periodically update the registry. Occasionally,  
12 information such as recruitment status might not be updated in real time.  
13  
14  
15  
16  
17  
18  
19

20 Concerns around the growing threat of antimicrobial resistance have prompted several new  
21 initiatives. In 2016, the EMA published a draft Concept Paper to propose the development of an  
22 Addendum to the guideline on the evaluation of new anti-bacterial products for treatment of bacterial  
23 infections in children.[19] At the same time, the Clinical Trials Transformation Initiative (CTTI) is  
24 currently focused on the identification of key barriers in the conduct of pediatric antibacterial CTs,  
25 which hamper their successful implementation into clinical practice.[20] Recent evidence states that  
26 overall, antibiotic CTs make up less than 1% of all registered pediatric CTs, and that trial completion  
27 is slow, with an average time to completion of around two years.[21] There are specific areas where  
28 the design and conduct of pediatric antibiotic CTs can be harmonized and simplified, such as the  
29 standardisation of the inclusion and exclusion criteria for specific Clinical Infection Syndromes, and  
30 improved bridging of safety and efficacy data from other age groups; these advances could improve  
31 trial conduct and efficiency in children.[22]  
32  
33  
34  
35  
36  
37  
38  
39  
40

## 41 **CONCLUSIONS**

42 This review highlights that very few pediatric antibiotic CTs are being conducted globally,  
43 particularly in neonates. There is a marked disparity between antibiotic drug development  
44 programmes in adults and children. Many issues contribute to the difficulties in conducting pediatric  
45 antibiotic clinical trials. The lack of regulatory guidance, vulnerability of this population, issues with  
46 informed consent and assent, and lack of research-experienced hospital personnel all present  
47 challenges in study design, delivery and recruitment. Delays in the initial start-up of CTs in children  
48 due to pediatric-specific protocol issues and complicated ethical approval continue to discourage  
49 both academic and pharmaceutical interest. The limited data presented here suggest that the  
50 dismal state of pediatric antibiotic research continues. Earlier collaboration between global  
51 academic research networks and pharmaceutical companies is now vital to accelerate progress.  
52  
53  
54  
55  
56  
57  
58  
59  
60

## ACKNOWLEDGEMENTS

**Contributors** MS, CB, GT, LF and JB designed the study, GT conducted the search, IL and JB commented on study design and assisted with drafting the paper.

**Funding** This research received no specific grant from any funding agency in the public, commercial or not-for-profit sectors. CB was funded as a Clinical Research Fellow by the Global Research in Paediatrics (GRiP) Network of Excellence, part of the European Union's Seventh Framework Programme for research, technological development and demonstration (FP7/2007–2013, grant agreement number 261060).

**Conflict of interest** None declared.

**Data sharing statement** Full dataset is available on request.

## REFERENCES

1. Corny J, Lebel D, Bailey B et al. Unlicensed and Off-Label Drug Use in Children Before and After Pediatric Governmental Initiatives. *J Pediatr Pharmacol Ther.* 2015;20(4):316–28.
2. European Medicines Agency. Concept paper on extrapolation of efficacy and safety in medicine development.  
[http://www.ema.europa.eu/docs/en\\_GB/document\\_library/Scientific\\_guideline/2013/04/WC500142358.pdf](http://www.ema.europa.eu/docs/en_GB/document_library/Scientific_guideline/2013/04/WC500142358.pdf). (accessed May 2016)
3. Dunne J, Rodriguez WJ, Murphy MD et al. Extrapolation of Adult Data and Other Data in Pediatric Drug-Development Programs. *Pediatrics.* 2011;  
<http://pediatrics.aappublications.org/content/early/2011/10/20/peds.2010-3487.abstract> (accessed June 2016)
4. Kearns GL, Abdel-Rahman SM, Alander SW et al. Developmental pharmacology--drug disposition, action, and therapy in infants and children. *N Engl J Med.* 2003;349(12):1157–67.
5. Theuretzbacher U, Van Bambeke F, Cantón R et al. Reviving old antibiotics. *Internet J Antimicrob Chemother.* 2015;  
<http://jac.oxfordjournals.org/content/early/2015/06/10/jac.dkv157.abstract> (accessed June 2016)
6. van der Meer JW, Gyssens IC. Quality of antimicrobial drug prescription in hospital. *Clin Microbiol Infect.* 2001;7:12–5.
7. European Medicines Agency. EMA Opinions and decisions on Paediatric Investigation Plans. 2016;  
[http://www.ema.europa.eu/ema/index.jsp?curl=pages/medicines/landing/pip\\_search.jsp&mid=WC0b01ac058001d129](http://www.ema.europa.eu/ema/index.jsp?curl=pages/medicines/landing/pip_search.jsp&mid=WC0b01ac058001d129). (accessed June 2016)

- 1  
2  
3 8. Guidance for industry. Pediatric Study Plans: Content of and Process for Submitting Initial  
4 Pediatric Study Plans and Amended Initial Pediatric Study Plans.  
5 [http://www.fda.gov/downloads/drugs/guidancecomplianceregulatoryinformation/guidances/uc](http://www.fda.gov/downloads/drugs/guidancecomplianceregulatoryinformation/guidances/ucm360507.pdf)  
6 [m360507.pdf](http://www.fda.gov/downloads/drugs/guidancecomplianceregulatoryinformation/guidances/ucm360507.pdf). (accessed June 2016)  
7  
8
- 9 9. Garazzino S, Lutsar I, Bertaina C et al. New antibiotics for paediatric use: a review of a  
10 decade of regulatory trials submitted to the European Medicines Agency from 2000--why  
11 aren't we doing better? *Int J Antimicrob Agents*. 2013;42(2):99–118.  
12
- 13 10. The World Bank. The World Bank list of economies. 2015;  
14 <http://siteresources.worldbank.org/DATASTATISTICS/Resources/CLASS.XLS> (accessed  
15 October 2016)  
16  
17
- 18 11. The World Health Organisation. WHO ATC/DDD Index. 2016;  
19 [http://www.whocc.no/atc\\_ddd\\_index/](http://www.whocc.no/atc_ddd_index/). (accessed March 2016)  
20
- 21 12. The Pew Charitable Trusts. Antibiotics Currently in Clinical Development. 2016;  
22 [http://www.pewtrusts.org/~media/assets/2016/05/antibiotics-currently-in-clinical-](http://www.pewtrusts.org/~media/assets/2016/05/antibiotics-currently-in-clinical-development.pdf?la=en)  
23 [development.pdf?la=en](http://www.pewtrusts.org/~media/assets/2016/05/antibiotics-currently-in-clinical-development.pdf?la=en). (accessed May 2016)  
24  
25
- 26 13. Lutsar I. Often neglected: paediatric drug development - a regulatory and clinical view. In  
27 Amsterdam, Netherlands; 2016. (S219 - Symposium lecture.).  
28
- 29 14. Versporten A, Bielicki J, Drapier N et al. The Worldwide Antibiotic Resistance and Prescribing  
30 in European Children (ARPEC) point prevalence survey: developing hospital-quality  
31 indicators of antibiotic prescribing for children. *J Antimicrob Chemother*. 2016;71(4):1106–17.  
32
- 33 15. Bielicki JA, Lundin R, Sharland M. Antibiotic Resistance Prevalence in Routine Bloodstream  
34 Isolates from Children's Hospitals Varies Substantially from Adult Surveillance Data in  
35 Europe. *Pediatr Infect Dis J*. 2015;34(7):734–41.  
36  
37
- 38 16. Stockmann C, Sherwin CMT, Ampofo K et al. Characteristics of antimicrobial studies  
39 registered in the USA through ClinicalTrials.gov. *Int J Antimicrob Agents*. 2013;42(2):161–6.  
40
- 41 17. Califf RM, Zarin DA, Kramer JM et al. Characteristics of clinical trials registered in  
42 ClinicalTrials.gov, 2007-2010. *JAMA*. 2012;307(17):1838–47.  
43
- 44 18. Viergever RF, Rademaker CMA, Ghersi D. Pharmacokinetic research in children: an analysis  
45 of registered records of clinical trials. *BMJ Open*. 2011;1(1):e000221.  
46
- 47 19. European Medicines Agency. Concept paper on an addendum to the guideline on the  
48 evaluation of medicinal products indicated for treatment of bacterial infections to address  
49 paediatric-specific clinical data requirements.  
50 [http://www.ema.europa.eu/docs/en\\_GB/document\\_library/Scientific\\_guideline/2016/04/WC50](http://www.ema.europa.eu/docs/en_GB/document_library/Scientific_guideline/2016/04/WC500205026.pdf)  
51 [0205026.pdf](http://www.ema.europa.eu/docs/en_GB/document_library/Scientific_guideline/2016/04/WC500205026.pdf). (accessed July 2016)  
52  
53  
54
- 55 20. Clinical Trials Transformation Initiative. [https://www.ctti-clinicaltrials.org/projects/pediatric-](https://www.ctti-clinicaltrials.org/projects/pediatric-trials)  
56 [trials](https://www.ctti-clinicaltrials.org/projects/pediatric-trials). (accessed July 2016)  
57  
58  
59  
60

- 1
- 2
- 3 21. Clinical Trials Transformation Initiative. AACT database. [https://www.ctti-](https://www.ctti-clinicaltrials.org/aact-database)
- 4 [clinicaltrials.org/aact-database](https://www.ctti-clinicaltrials.org/aact-database). (accessed January 2017)
- 5
- 6 22. Folgori L, Bielicki J, Ruiz B, et al. Harmonisation in study design and outcomes in paediatric
- 7 antibiotic clinical trials: a systematic review. *Lancet Infect Dis*. 2016;16(9):e178-89.
- 8
- 9
- 10
- 11
- 12
- 13
- 14
- 15
- 16
- 17
- 18
- 19
- 20
- 21
- 22
- 23
- 24
- 25
- 26
- 27
- 28
- 29
- 30
- 31
- 32
- 33
- 34
- 35
- 36
- 37
- 38
- 39
- 40
- 41
- 42
- 43
- 44
- 45
- 46
- 47
- 48
- 49
- 50
- 51
- 52
- 53
- 54
- 55
- 56
- 57
- 58
- 59
- 60

For peer review only

1  
2  
3 **LIST OF FIGURES**  
4  
5

6 **Figure 1.** Flow chart. Clinical trial selection process.  
7

8  
9 **Table 1.** Characteristics of clinical trials.  
10

11 **Table 2.** Clinical trial endpoint classification of identified clinical trials stratified by trial sponsor.  
12 Endpoint classification determined by planned primary outcomes.  
13

14  
15 **Table 3.** Clinical indication of identified clinical trials stratified by age group being recruited.  
16

17  
18 **Table 4.** Comparison of antibiotic development pipeline in adults and children. Adapted from Pew  
19 Charitable Trusts “Antibiotics currently in clinical development” pipeline (last accessed October  
20 2016).[12]  
21  
22  
23  
24  
25  
26  
27  
28  
29  
30  
31  
32  
33  
34  
35  
36  
37  
38  
39  
40  
41  
42  
43  
44  
45  
46  
47  
48  
49  
50  
51  
52  
53  
54  
55  
56  
57  
58  
59  
60



1  
2  
3  
4  
5  
6  
7  
8  
9  
10  
11  
12  
13  
14  
15  
16  
17  
18  
19  
20  
21  
22  
23  
24  
25  
26  
27  
28  
29  
30  
31  
32  
33  
34  
35  
36  
37  
38  
39  
40  
41  
42  
43  
44  
45  
46  
47  
48  
49  
50  
51  
52  
53  
54  
55  
56  
57  
58  
59  
60

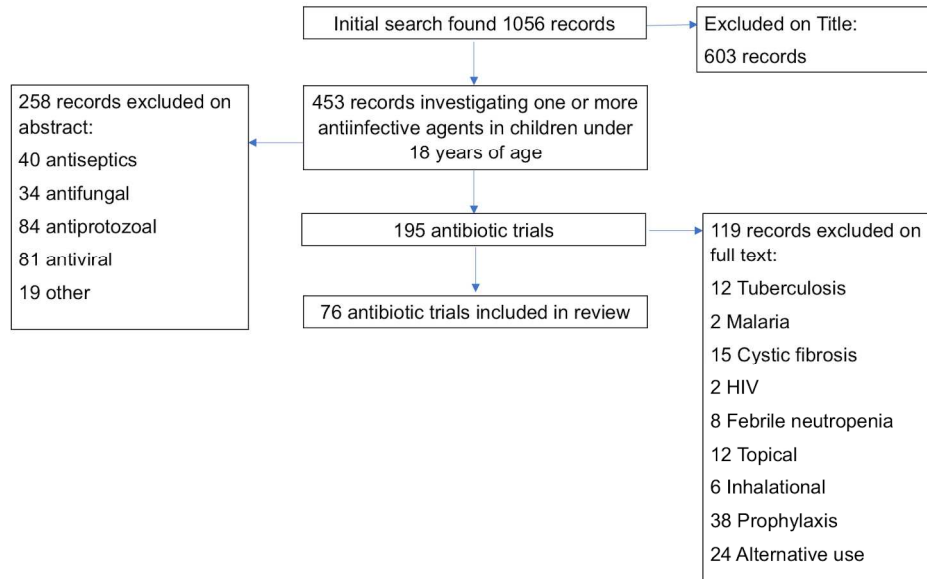

Figure 1. Flow Chart. Clinical trial selection process.

254x190mm (300 x 300 DPI)

ew only

## DATASET

|    | A                 | B                                                                                                            | C                  | D                    |
|----|-------------------|--------------------------------------------------------------------------------------------------------------|--------------------|----------------------|
| 1  | <b>NCT Number</b> | <b>Title</b>                                                                                                 | <b>Recruitment</b> | <b>Study Results</b> |
| 2  | NCT02539407       | Population Pharmacokinetics of Anti-infectives in Critically Ill Children                                    | Recruiting         | No Results Available |
| 3  | NCT02935374       | Effect of Antimicrobial Treatment of Acute Otitis Media on the Intestinal Microbiome in Children             | Not yet recruiting | No Results Available |
| 4  | NCT02899143       | Short-course Antimicrobial Therapy in Sepsis                                                                 | Recruiting         | No Results Available |
| 5  | NCT01595529       | The SCOUT Study: Short Course Therapy for Urinary Tract Infections in Children                               | Recruiting         | No Results Available |
| 6  | NCT02380352       | Short-course Antimicrobial Therapy for Paediatric Respiratory Infections                                     | Not yet recruiting | No Results Available |
| 7  | NCT02891915       | Trial to Evaluate Beta-Lactam Antimicrobial Therapy of Community Acquired Pneumonia in Children              | Recruiting         | No Results Available |
| 8  | NCT02746276       | Optimising Antibiotic Treatment for Sick Malnourished Children                                               | Recruiting         | No Results Available |
| 9  | NCT02917551       | BALANCE on the Wards: A Pilot RCT                                                                            | Not yet recruiting | No Results Available |
| 10 | NCT01243437       | A Clinical Trial to Evaluate the Safety and Efficacy of Ciprofloxacin in the Treatment of Plague in Children | Recruiting         | No Results Available |
| 11 | NCT02635191       | Tailored Therapy for Helicobacter Pylori in Children                                                         | Recruiting         | No Results Available |
| 12 | NCT01522105       | Daptomycin in Pediatric Patients With Bacterial Meningitis                                                   | Recruiting         | No Results Available |
| 13 | NCT02456974       | Antibiotic Dosing in Pediatric Intensive Care                                                                | Recruiting         | No Results Available |
| 14 | NCT00579956       | A Randomized Double Blinded Comparison of Ceftazidime and Meropenem in Severe Melioidosis                    | Recruiting         | No Results Available |
| 15 | NCT00545961       | Middle Meatal Bacteriology During Acute Respiratory Infection in Children                                    | Not yet recruiting | No Results Available |
| 16 | NCT01431326       | Pharmacokinetics of Understudied Drugs Administered to Children Per Standard of Care                         | Recruiting         | No Results Available |
| 17 | NCT02475876       | PK of Clindamycin and Trimethoprim-sulfamethoxazole in Infants and Children                                  | Recruiting         | No Results Available |
| 18 | NCT01420341       | Co-trimoxazole as Maintenance Therapy for Melioidosis                                                        | Recruiting         | No Results Available |
| 19 | NCT02266706       | Pharmacokinetic and Safety Study of Ceftolozane/Tazobactam in Pediatric Participants Receiving               | Recruiting         | No Results Available |
| 20 | NCT00867789       | Antibiotics Versus Placebo in the Treatment of Abscesses in the Emergency Department                         | Recruiting         | No Results Available |
| 21 | NCT02879981       | A Safety Study of Balsamic Bactrim in Pediatric Participants With Acute Bronchitis                           | Not yet recruiting | No Results Available |
| 22 | NCT01269541       | MESS-study MRSA Eradication Study Sk'ne                                                                      | Recruiting         | No Results Available |
| 23 | NCT02276482       | Study of Tedizolid Phosphate in Adolescents With Complicated Skin and Soft Tissue Infection (cS              | Recruiting         | No Results Available |
| 24 | NCT02663596       | Safety and TDM of Continuous Infusion Vancomycin Through Continuous Renal Replacement Th                     | Not yet recruiting | No Results Available |
| 25 | NCT02555059       | Special Drug Use Investigation of Ciproxan Injection in Pediatrics                                           | Recruiting         | No Results Available |
| 26 | NCT02297815       | Comparative Effectiveness of Antibiotics for Respiratory Infections                                          | Recruiting         | No Results Available |
| 27 | NCT02224040       | Typhoid Fever: Combined vs. Single Antibiotic Therapy                                                        | Recruiting         | No Results Available |
| 28 | NCT02775968       | Population Pharmacokinetics of Cephalosporins and Macrolides in Chinese Children With Comm                   | Not yet recruiting | No Results Available |
| 29 | NCT02687906       | Dose-finding, Pharmacokinetics, Safety, and Tolerability of Meropenem-Vaborbactam in Pediatr                 | Recruiting         | No Results Available |
| 30 | NCT02783859       | Hospitalised Pneumonia With Extended Treatment (HOPE) Study                                                  | Recruiting         | No Results Available |
| 31 | NCT01994993       | Antibiotic Safety (SCAMP)                                                                                    | Recruiting         | No Results Available |

|    | A           | B                                                                                                 | C                  | D                    |
|----|-------------|---------------------------------------------------------------------------------------------------|--------------------|----------------------|
| 32 | NCT02258763 | Trial on the Ideal Duration of Oral Antibiotics in Children With Pneumonia                        | Recruiting         | No Results Available |
| 33 | NCT02688790 | Study Evaluate the PK Profile of Dalbavancin in Hospitalized Infants and Neonates Patients With   | Recruiting         | No Results Available |
| 34 | NCT00323219 | Oral Moxifloxacin Versus Cefazolin and Oral Probenecid in the Management of Skin and Soft Tis     | Recruiting         | No Results Available |
| 35 | NCT02750761 | A Study of Oral and Intravenous (IV) Tedizolid Phosphate in Hospitalized Participants, Ages 2 to  | Recruiting         | No Results Available |
| 36 | NCT02466438 | Safety and Pharmacokinetics of Piperacillin-tazobactam Extended Infusion in Infants and Childre   | Recruiting         | No Results Available |
| 37 | NCT02260102 | Temocillin Pharmacokinetics in Paediatrics                                                        | Not yet recruiting | No Results Available |
| 38 | NCT02694458 | Comparison of Two Dosage Adjustment Strategies of Vancomycin in Children                          | Recruiting         | No Results Available |
| 39 | NCT01540838 | Slow Initial beta-lactam Infusion With High-dose Paracetamol to Improve the Outcomes of Child     | Recruiting         | No Results Available |
| 40 | NCT00368498 | A Trial to Evaluate the Loading Dose Required to Achieve Therapeutic Serum Teicoplanin Concer     | Recruiting         | No Results Available |
| 41 | NCT01785641 | Single Versus Combined Antibiotic Therapy for Bacterial Peritonitis in CAPD Patients              | Recruiting         | No Results Available |
| 42 | NCT02554383 | Efficacy of Antibiotics in Children With Acute Sinusitis: Which Subgroups Benefit?                | Recruiting         | No Results Available |
| 43 | NCT01265173 | Comparison of Efficacy of Cefotaxime, Ceftriaxone, and Ciprofloxacin for the Treatment of Spon    | Recruiting         | No Results Available |
| 44 | NCT02335905 | Ceftaroline for Treatment of Hematogenously Acquired Staphylococcus Aureus Osteomyelitis in       | Recruiting         | No Results Available |
| 45 | NCT02922686 | Penicillin for the Emergency Department Outpatient Treatment of CELLulitis                        | Not yet recruiting | No Results Available |
| 46 | NCT02848820 | Initial Non-operative Treatment Strategy Versus Appendectomy Treatment Strategy for Simple A      | Not yet recruiting | No Results Available |
| 47 | NCT02475733 | Evaluation of Safety, Pharmacokinetics and Efficacy of CAZ-AVI With Metronidazole in Children A   | Recruiting         | No Results Available |
| 48 | NCT02372461 | Randomized Trial of Amoxicillin Versus Placebo for (Fast Breathing) Pneumonia                     | Recruiting         | No Results Available |
| 49 | NCT01553006 | Study of Cefditoren Pivoxil in Treatment of Childhood With Acute Rhinosinusitis                   | Recruiting         | No Results Available |
| 50 | NCT02527681 | Pharmacokinetics and Safety of Ceftobiprole in Neonates and Infants up to 3 Months Treated W      | Recruiting         | No Results Available |
| 51 | NCT02210169 | RCT of Continuous Versus Intermittent Infusion of Vancomycin in Neonates                          | Recruiting         | No Results Available |
| 52 | NCT02497781 | Evaluation of Safety, Pharmacokinetics and Efficacy of Ceftazidime and Avibactam (CAZ-AVI ) Co    | Recruiting         | No Results Available |
| 53 | NCT02814916 | Dalbavancin for the Treatment of Acute Bacterial Skin and Skin Structure Infections in Children,  | Not yet recruiting | No Results Available |
| 54 | NCT02210325 | Efficacy and Safety Study of Oral Solithromycin Compared to Intramuscular Ceftriaxone Plus Ora    | Recruiting         | No Results Available |
| 55 | NCT02801370 | Phase 3 Study of OTO-201 in Acute Otitis Externa                                                  | Recruiting         | No Results Available |
| 56 | NCT02760420 | 3 Days Amoxicillin Versus Placebo for Fast Breathing Childhood Pneumonia in Malawi                | Recruiting         | No Results Available |
| 57 | NCT02678195 | 3 Days Versus 5 Days Amoxicillin for Chest-indrawing Childhood Pneumonia in Malawi                | Recruiting         | No Results Available |
| 58 | NCT02605122 | Safety and Efficacy of Solithromycin in Adolescents and Children With Community-acquired Bact     | Recruiting         | No Results Available |
| 59 | NCT02570490 | Oral Sodium Fusidate (CEM-102) Versus Oral Linezolid for the Treatment of Acute Bacterial Skin    | Recruiting         | No Results Available |
| 60 | NCT02443285 | Is Spontaneous Bacterial Peritonitis Still Responding to 3rd Generation Cephalosporins?           | Recruiting         | No Results Available |
| 61 | NCT02334124 | Comparing the Intravenous Treatment of Skin Infections in Children, Home Versus Hospital          | Recruiting         | No Results Available |
| 62 | NCT02218372 | A Study to Investigate the Safety and Efficacy of Fidaxomicin (Oral Suspension or Tablets) and Va | Recruiting         | No Results Available |

1  
2  
3  
4  
5  
6  
7  
8  
9  
10  
11  
12  
13  
14  
15  
16  
17  
18  
19  
20  
21  
22  
23  
24  
25  
26  
27  
28  
29  
30  
31  
32  
33  
34  
35  
36  
37  
38  
39  
40  
41  
42  
43  
44  
45  
46  
47

|    | A           | B                                                                                                | C                  | D                    |
|----|-------------|--------------------------------------------------------------------------------------------------|--------------------|----------------------|
| 63 | NCT01032499 | Open and Comparative Study to Measure Tolerability and Efficacy of Taro Elixir                   | Not yet recruiting | No Results Available |
| 64 | NCT02598362 | Pharmacokinetics of Ciprofloxacin in Pediatric Patients                                          | Recruiting         | No Results Available |
| 65 | NCT02878031 | Community Case Management of Chest Indrawing Pneumonia                                           | Recruiting         | No Results Available |
| 66 | NCT02790996 | Neonatal Vancomycin Trial                                                                        | Not yet recruiting | No Results Available |
| 67 | NCT02712307 | Study of 5 and 10 Days Treatment With Penicillin Against Sore Throat Caused by Streptococci      | Recruiting         | No Results Available |
| 68 | NCT02424734 | Safety, Tolerability and Efficacy of Ceftaroline in Paediatrics With Late-Onset Sepsis           | Recruiting         | No Results Available |
| 69 | NCT02134301 | Open-Label, Dose-Finding, Pharmacokinetics, Safety and Tolerability Study of Oritavancin in Ped  | Recruiting         | No Results Available |
| 70 | NCT02013141 | An Open-Label Study of the Pharmacokinetics of a Single Dose of Telavancin in Pediatric Subject  | Recruiting         | No Results Available |
| 71 | NCT01427842 | Dose Enhancement of Vancomycin IN Everyday Patients                                              | Recruiting         | No Results Available |
| 72 | NCT01278017 | The Role of Short-course Ceftriaxone Therapy in the Treatment of Severe Nontyphoidal Salmon      | Recruiting         | No Results Available |
| 73 | NCT00988026 | Safety and Efficacy Comparison of Minocycline Microgranules Versus Lymecycline in the Treatm     | Recruiting         | No Results Available |
| 74 | NCT02288234 | Telavancin Observational Use Registry (TOUR)                                                     | Recruiting         | No Results Available |
| 75 | NCT01304459 | Vancomycin Serum Concentrations in Pediatric Oncology Patients Under Intensive Care              | Recruiting         | No Results Available |
| 76 | NCT01173575 | Assessment of the Efficacy of FOSFOMYCIN in Patients With Bacterial Infection                    | Recruiting         | No Results Available |
| 77 | NCT01778634 | Trial of Intravenous Azithromycin to Eradicate Ureaplasma Respiratory Tract Infection in Preterr | Recruiting         | No Results Available |

|    | E                                                                     | F                         |
|----|-----------------------------------------------------------------------|---------------------------|
| 1  |                                                                       |                           |
| 2  |                                                                       |                           |
| 3  | <b>1 Indication</b>                                                   | <b>Infection category</b> |
| 4  | 2 Proven or suspected infection (in patients on PICU)                 | 9                         |
| 5  | 3 Acute Otitis Media                                                  | 3                         |
| 6  | 4 Sepsis                                                              | 8                         |
| 7  | 5 Urinary Tract Infections (UTI)                                      | 7                         |
| 8  | 6 Community-acquired Pneumonia (CAP)                                  | 4                         |
| 9  | 7 Pneumonia                                                           | 4                         |
| 10 | 8 Proven or suspected infection in patients with malnutrition         | 9                         |
| 11 | 9 Bacteremia                                                          | 8                         |
| 12 | 10 Plague                                                             | 8                         |
| 13 | 11 Helicobacter Pylori Infection                                      | 7                         |
| 14 | 12 Meningitis                                                         | 1                         |
| 15 | 13 Proven or suspected bacterial infection (Pharmacokinetics)         | 9                         |
| 16 | 14 Melioidosis                                                        | 8                         |
| 17 | 15 Acute Respiratory Infection   Sinusitis                            | 3                         |
| 18 | 16 Various infections (including nosocomial Pneumonia, CAP, Acute Bac | Various                   |
| 19 | 17 Bacterial Infections                                               | 9                         |
| 20 | 18 Melioidosis                                                        | 8                         |
| 21 | 19 Proven or Suspected Gram-negative Bacterial Infection              | 9                         |
| 22 | 20 Abscess                                                            | 1                         |
| 23 | 21 Bronchitis                                                         | 4                         |
| 24 | 22 Throatcarriers of MRSA                                             | 3                         |
| 25 | 23 Acute Skin and Soft Tissue infections (aSSTIs)                     | 2                         |
| 26 | 24 Proven or suspected bacterial infection (in CRRT patients)         | 9                         |
| 27 | 25 Cystitis / Pyelonephritis                                          | 7                         |
| 28 | 26 Acute Upper Respiratory Tract Infections (ARTIs)                   | 3                         |
| 29 | 27 Typhoid Fever                                                      | 8                         |
| 30 | 28 Community Acquired Pneumonia (CAP)                                 | 4                         |
| 31 | 29 Bacterial Infections                                               | 9                         |
| 32 | 30 Pneumonia                                                          | 4                         |
| 33 | 31 Complicated Intra Abdominal Infections (cIAs)                      | 6                         |
| 34 |                                                                       |                           |
| 35 |                                                                       |                           |
| 36 |                                                                       |                           |
| 37 |                                                                       |                           |
| 38 |                                                                       |                           |
| 39 |                                                                       |                           |
| 40 |                                                                       |                           |
| 41 |                                                                       |                           |
| 42 |                                                                       |                           |
| 43 |                                                                       |                           |
| 44 |                                                                       |                           |
| 45 |                                                                       |                           |
| 46 |                                                                       |                           |
| 47 |                                                                       |                           |

|    | E                                                           | F |
|----|-------------------------------------------------------------|---|
| 32 | Pneumonia                                                   | 4 |
| 33 | Bacterial Infections                                        | 9 |
| 34 | Cellulitis                                                  | 2 |
| 35 | Gram-Positive Bacterial Infections                          | 9 |
| 36 | Infection                                                   | 9 |
| 37 | Urinary Tract Infection or suspected Cholangitis            | 7 |
| 38 | Methicillin-resistant Staphylococcal Infections             | 9 |
| 39 | Bacterial Meningitis                                        | 1 |
| 40 | Staphylococcal Infections                                   | 9 |
| 41 | Peritonitis (in CAPD patients)                              | 6 |
| 42 | Acute Sinusitis (Respiratory Tract Infections)              | 3 |
| 43 | SBP in patients with Liver Cirrhosis                        | 6 |
| 44 | Hematogenously Acquired Staphylococcus Aureus Osteomyelitis | 5 |
| 45 | Cellulitis or Wound Infection                               | 8 |
| 46 | Appendicitis                                                | 6 |
| 47 | Complicated Intra-abdominal Infections (cIAs)               | 6 |
| 48 | Pneumonia (fast-breathing)                                  | 4 |
| 49 | Rhinosinusitis                                              | 3 |
| 50 | Bacterial Infections                                        | 9 |
| 51 | Sepsis                                                      | 8 |
| 52 | Complicated Urinary Tract Infections (cUTIs)                | 7 |
| 53 | Methicillin-Resistant Staphylococcus Aureus Skin Infection  | 2 |
| 54 | Uncomplicated Urogenital Gonorrhoea                         | 7 |
| 55 | Acute Otitis Externa                                        | 3 |
| 56 | Pneumonia                                                   | 4 |
| 57 | Pneumonia                                                   | 4 |
| 58 | Community-acquired Bacterial Pneumonia                      | 4 |
| 59 | Acute Bacterial Skin and Skin Structure Infections          | 2 |
| 60 | Primary Bacterial Peritonitis                               | 6 |
| 61 | Cellulitis                                                  | 8 |
| 62 | Clostridium Difficile-associated Diarrhea (CDAD)            | 6 |

|    | E                                                                       | F       |
|----|-------------------------------------------------------------------------|---------|
| 1  |                                                                         |         |
| 2  |                                                                         |         |
| 3  | 63 Acne Vulgaris II or III Degree                                       | 2       |
| 4  | 64 Urinary Tract Infection or Pyelonephritis                            | 7       |
| 5  | 65 Pneumonia                                                            | 4       |
| 6  | 66 Late Onset Neonatal Sepsis                                           | 8       |
| 7  | 67 Tonsillitis                                                          | 3       |
| 8  | 68 Late-onset Sepsis                                                    | 8       |
| 9  | 69 Gram Positive Bacterial Infections                                   | 9       |
| 10 | 70 Gram-Positive Bacterial Infections                                   | 9       |
| 11 | 71 Vancomycin Therapy                                                   | 9       |
| 12 | 72 Diarrhea                                                             | 6       |
| 13 | 73 Mild to Moderate Acne                                                | 2       |
| 14 | 74 Hospital Acquired Bacterial Pneumonia (HAP), Complicated Skin and    | Various |
| 15 | 75 Infection                                                            | 9       |
| 16 | 76 Bacterial Infection                                                  | 9       |
| 17 | 77 Eradicate ureaplasma respiratory tract infection from preterm infant | 4       |
| 18 |                                                                         |         |
| 19 |                                                                         |         |
| 20 |                                                                         |         |
| 21 |                                                                         |         |
| 22 |                                                                         |         |
| 23 |                                                                         |         |
| 24 |                                                                         |         |
| 25 |                                                                         |         |
| 26 |                                                                         |         |
| 27 |                                                                         |         |
| 28 |                                                                         |         |
| 29 |                                                                         |         |
| 30 |                                                                         |         |
| 31 |                                                                         |         |
| 32 |                                                                         |         |
| 33 |                                                                         |         |
| 34 |                                                                         |         |
| 35 |                                                                         |         |
| 36 |                                                                         |         |
| 37 |                                                                         |         |
| 38 |                                                                         |         |
| 39 |                                                                         |         |
| 40 |                                                                         |         |
| 41 |                                                                         |         |
| 42 |                                                                         |         |
| 43 |                                                                         |         |
| 44 |                                                                         |         |
| 45 |                                                                         |         |
| 46 |                                                                         |         |
| 47 |                                                                         |         |



|    | G                                                                                   | H                                  | I             | J                     |
|----|-------------------------------------------------------------------------------------|------------------------------------|---------------|-----------------------|
| 1  |                                                                                     |                                    |               |                       |
| 2  |                                                                                     |                                    |               |                       |
| 3  | <b>1 Interventions</b>                                                              | <b>Antibiotic class (J01 code)</b> | <b>Gender</b> | <b>Age</b>            |
| 4  | 2 Antiinfectives (beta-lactam, aminoglycoside, glycopeptide, fluoroquinolone,       | Various                            | Both          | Up to 18 Years        |
| 5  | 3 Amoxicillin, Amoxicillin-Potassium Clavulanate, Macrolide                         | Various                            | Both          | 6 Months to 7 Years   |
| 6  | 4 Antibiotic                                                                        | J01                                | Both          | Up to 18 years        |
| 7  | 5 Trimethoprim sulfamethoxazole, cefixime, or cephalexin                            | Various                            | Both          | 2 Months to 10 Years  |
| 8  | 6 Amoxicillin                                                                       | J01C                               | Both          | 6 Months to 10 Years  |
| 9  | 7 Amoxicillin, Amoxicillin-clavulanate, Cefdinir                                    | Various                            | Both          | 6 Months to 71 Months |
| 10 | 8 Ceftriaxone, Metronidazole                                                        | J01D                               | Both          | 2 Months to 59 Months |
| 11 | 9 7 days vs 14 days of adequate antibiotic treatment                                | J01                                | Both          | Up to 18 years        |
| 12 | 10 Ciprofloxacin, doxyxcycline                                                      | Various                            | Both          | 8 Years and older     |
| 13 | 11 Tailored vs standard therapy (Amoxicillin, Clarithromycin, Metronidazole, Ra     | Various                            | Both          | 4 Years to 18 Years   |
| 14 | 12 Daptomycin                                                                       | J01X                               | Both          | 3 Months to 16 Years  |
| 15 | 13 Amoxicillin-clavulanate, Piperacilline-tazobactam, Vancomycin                    | Various                            | Both          | Up to 16 Years        |
| 16 | 14 Meropenem, Ceftazidime                                                           | J01D                               | Both          | 15 Years and older    |
| 17 | 15 Amoxicillin clavulanate acid                                                     | J01C                               | Both          | 6 Years to 13 Years   |
| 18 | 16 Various drugs (Ceftazidime, Ciprofloxacin, Clindamycin, Doxycycline, Levoflo     | Various                            | Both          | Up to 18 years        |
| 19 | 17 Clindamycin, Trimethoprim-sulfamethoxazole                                       | Various                            | Both          | 1 Month to 16 Years   |
| 20 | 18 Co-trimoxazole                                                                   | J01E                               | Both          | 15 Years and older    |
| 21 | 19 Ceftolozane/Tazobactam                                                           | J01D                               | Both          | Up to 17 Years        |
| 22 | 20 Trimethoprim-sulfamethoxazole                                                    | J01E                               | Both          | 3 Months to 17 Years  |
| 23 | 21 Guaifenesin, Sulfamethoxazole trimethoprim                                       | J01E                               | Both          | 4 Years to 14 Years   |
| 24 | 22 Systemic Rifampin and Clindamycine/Trimehoprimsulfa, or Topical mupiroci         | Various                            | Both          | 5 Years and older     |
| 25 | 23 Tedizolid Phosphate                                                              | J01X                               | Both          | 12 Years to 18 Years  |
| 26 | 24 Vancomycin                                                                       | J01X                               | Both          | Up to 18 years        |
| 27 | 25 Ciprofloxacin                                                                    | J01F                               | Both          | Up to 14 Years        |
| 28 | 26 Antibiotics (Amoxicillin-clavulanate, azithromycin, cefdinir, cefprozil, cefurox | Various                            | Both          | 6 Months to 18 Years  |
| 29 | 27 Ceftriaxone, Ceftriaxone/azithromycin, Azithromycin, Azithromycin/cefixime       | Various                            | Both          | 2 Years to 80 Years   |
| 30 | 28 Cephalosporins and Macrolides                                                    | Various                            | Both          | 1 Year to 18 Years    |
| 31 | 29 Carbavance                                                                       | J01D                               | Both          | Up to 17 Years        |
| 32 | 30 Amoxicillin-clavulanic Acid                                                      | J01C                               | Both          | 3 Months to 5 Years   |
| 33 | 31 Ampicillin/metronidazole/gentamicin/clindamycin/Piperacillin-tazobactam c        | Various                            | Both          | Up to 120 Days        |



|    | G                                                                       | H       | I    | J                     |
|----|-------------------------------------------------------------------------|---------|------|-----------------------|
| 32 | Amoxicillin-Potassium Clavulanate                                       | J01C    | Both | 3 Months to 59 Months |
| 33 | Dalbavancin                                                             | J01X    | Both | Up to 28 Days         |
| 34 | Cefazolin/Moxifloxacin                                                  | Various | Both | Up to 18 Years        |
| 35 | Tedizolid Phosphate                                                     | J01X    | Both | 2 Years to 11 Years   |
| 36 | Piperacillin-tazobactam                                                 | J01C    | Both | 2 Months to 6 Years   |
| 37 | Temocillin                                                              | J01C    | Both | 6 Months to 3 Years   |
| 38 | Vancomycin                                                              | J01X    | Both | 1 Month to 16 Years   |
| 39 | Beta-lactam                                                             | J01C    | Both | 2 Months to 15 Years  |
| 40 | Teicoplanin                                                             | J01X    | Both | 16 Years and older    |
| 41 | Ceftazidime/ciprofloxacin, Ceftazidime, Cefazolin/gentamicin, Cefazolin | Various | Both | 15 Years and older    |
| 42 | Amoxicillin-clavulanate                                                 | J01C    | Both | 2 Years to 11 Years   |
| 43 | Cefotaxime, Ceftriaxone, Ciprofloxacin                                  | Various | Both | 16 Years and older    |
| 44 | Ceftaroline Fosamil                                                     | J01D    | Both | 1 Year to 17 Years    |
| 45 | Flucloxacillin, Phenoxymethylpenicillin                                 | J01C    | Both | 16 Years and older    |
| 46 | Augmentin/Gentamicin, Appendectomy                                      | J01C    | Both | 7 Years to 17 Years   |
| 47 | Ceftazidime-avibactam, Meropenem, Metronidazole                         | Various | Both | 3 Months to 18 Years  |
| 48 | Amoxicillin                                                             | J01C    | Both | 2 Months to 59 Months |
| 49 | Cefditoren pivoxil                                                      | J01D    | Both | 1 Year to 15 Years    |
| 50 | Ceftobiprole                                                            | J01D    | Both | Up to 3 Months        |
| 51 | Vancomycin                                                              | J01X    | Both | Up to 90 Days         |
| 52 | Ceftazidime-avibactam, Cefepime                                         | J01D    | Both | 3 Months to 18 Years  |
| 53 | Dalbavancin single dose                                                 | J01X    | Both | 3 Months to 17 Years  |
| 54 | Solithromycin, Ceftriaxone, Azithromycin                                | Various | Both | 15 Years and older    |
| 55 | Ciprofloxacin                                                           | J01M    | Both | 6 Months and older    |
| 56 | Amoxicillin                                                             | J01C    | Both | 2 Months to 59 Months |
| 57 | Amoxicillin                                                             | J01C    | Both | 2 Months to 59 Months |
| 58 | Solithromycin                                                           | J01F    | Both | 2 Months to 17 Years  |
| 59 | Sodium fusidate, Linezolid                                              | J01X    | Both | 12 Years and older    |
| 60 | Cefotaxime, Ceftriaxone                                                 | J01D    | Both | Up to 18 Years        |
| 61 | Ceftriaxone, Flucloxacillin                                             | Various | Both | 6 Months to 18 Years  |
| 62 | Fidaxomicin, Vancomycin                                                 | J01X    | Both | Up to 17 Years        |

1  
2  
3  
4  
5  
6  
7  
8  
9  
10  
11  
12  
13  
14  
15  
16  
17  
18  
19  
20  
21  
22  
23  
24  
25  
26  
27  
28  
29  
30  
31  
32  
33  
34  
35  
36  
37  
38  
39  
40  
41  
42  
43  
44  
45  
46  
47

|    | G                        | H    | I    | J                     |
|----|--------------------------|------|------|-----------------------|
| 63 | Taro Elixir              | J01A | Both | 14 Years and older    |
| 64 | Ciprofloxacin            | J01M | Both | 3 Months to 17 Years  |
| 65 | Amoxicillin              | J01C | Both | 2 Months to 59 Months |
| 66 | Vancomycin               | J01X | Both | Up to 90 Days         |
| 67 | Phenoxymethylpenicillin  | J01C | Both | 6 Years and older     |
| 68 | Ceftaroline Fosamil      | J01D | Both | Up to 59 Days         |
| 69 | Oritavancin              | J01X | Both | Up to 18 Years        |
| 70 | Telavancin               | J01X | Both | 1 Year to 17 Years    |
| 71 | Vancomycin               | J01X | Both | 16 Years and older    |
| 72 | Ceftriaxone              | J01D | Both | 3 Months to 18 Years  |
| 73 | Minocycline, Lymecycline | J01A | Both | 14 Years to 30 Years  |
| 74 | Telavancin               | J01X | Both | Up to 18 Years        |
| 75 | Vancomycin               | J01X | Both | Up to 18 Years        |
| 76 | Fosfomycin               | J01X | Both | Up to 18 Years        |
| 77 | Azithromycin             | J01F | Both | 0 to 72 hours         |

|    | K         | L                    | M                                  | N                           | O                 |
|----|-----------|----------------------|------------------------------------|-----------------------------|-------------------|
| 1  | Age group | Estimated enrollment | Location                           | Income class                | Geographic region |
| 2  | 8         | 1850                 | France                             | High income                 | Europe            |
| 3  | 9         | 150                  | Finland                            | High income                 | Europe            |
| 4  | 8         | 320                  | Italy                              | High income                 | Europe            |
| 5  | 9         | 746                  | United States                      | High income                 | North America     |
| 6  | 9         | 270                  | Canada                             | High income                 | North America     |
| 7  | 9         | 400                  | United States                      | High income                 | North America     |
| 8  | 9         | 80                   | Kenya                              | Lower middle income         | Africa            |
| 9  | 8         | 50                   | Canada                             | High income                 | North America     |
| 10 | 11        | 200                  | Uganda                             | Low income                  | Africa            |
| 11 | 11        | 200                  | China                              | Upper middle income         | Asia              |
| 12 | 10        | 5                    | Switzerland                        | High income                 | Europe            |
| 13 | 8         | 200                  | Belgium                            | High income                 | Europe            |
| 14 | 5         | 750                  | Thailand                           | Upper middle income         | Asia              |
| 15 | 11        | 120                  | Finland                            | High income                 | Europe            |
| 16 | 8         | 3000                 | Various (United States, Canada)    | High income                 | International     |
| 17 | 10        | 54                   | United States                      | High income                 | North America     |
| 18 | 5         | 800                  | Thailand                           | Upper middle income         | Asia              |
| 19 | 8         | 36                   | United States                      | High income                 | North America     |
| 20 | 10        | 200                  | United States                      | High income                 | North America     |
| 21 | 11        | 50                   | Peru                               | Upper middle income         | Latin America     |
| 22 | 11        | 69                   | Sweden                             | High income                 | North America     |
| 23 | 5         | 162                  | Various (United States, Argentina) | Upper middle to High income | International     |
| 24 | 8         | 10                   | United States                      | High income                 | North America     |
| 25 | 8         | 45                   | Japan                              | High income                 | Asia              |
| 26 | 10        | 117000               | United States                      | High income                 | North America     |
| 27 | 11        | 120                  | Nepal                              | Low income                  | Asia              |
| 28 | 10        | 750                  | China                              | Upper middle income         | Asia              |
| 29 | 8         | 56                   | United States                      | High income                 | North America     |
| 30 | 9         | 314                  | Various (Australia, Malaysia)      | High income                 | Oceania           |
| 31 | 6         | 284                  | Various (United States, Canada)    | High income                 | North America     |

|    | K  | L    | M                              | N                           | O             |
|----|----|------|--------------------------------|-----------------------------|---------------|
| 32 | 9  | 300  | Malaysia                       | Upper middle income         | Asia          |
| 33 | 2  | 24   | United States                  | High income                 | North America |
| 34 | 8  | 390  | Canada                         | High income                 | North America |
| 35 | 4  | 32   | United States                  | High income                 | North America |
| 36 | 9  | 141  | Canada                         | High income                 | North America |
| 37 | 9  | 45   | Belgium                        | High income                 | Europe        |
| 38 | 10 | 100  | France                         | High income                 | Europe        |
| 39 | 10 | 400  | Angola                         | Upper middle income         | Africa        |
| 40 | 5  | 20   | Taiwan, China                  | High income                 | Asia          |
| 41 | 5  | 300  | Thailand                       | Upper middle income         | Asia          |
| 42 | 4  | 688  | United States                  | High income                 | North America |
| 43 | 5  | 261  | Republic of Korea              | High income                 | Asia          |
| 44 | 10 | 18   | United States                  | High income                 | North America |
| 45 | 5  | 414  | Ireland                        | High income                 | Europe        |
| 46 | 11 | 334  | Netherlands                    | High income                 | Europe        |
| 47 | 10 | 102  | Various (United States, Argent | Upper middle to High income | International |
| 48 | 9  | 2500 | Pakistan                       | Lower middle income         | Asia          |
| 49 | 10 | 120  | Thailand                       | Upper middle income         | Asia          |
| 50 | 6  | 45   | Various (Belgium, Germany, Li  | High income                 | Europe        |
| 51 | 6  | 200  | Australia                      | High income                 | Oceania       |
| 52 | 10 | 102  | Various (United States, Czech  | Upper middle to High income | International |
| 53 | 10 | 300  | United States                  | High income                 | North America |
| 54 | 5  | 300  | Various (United States, Austra | High income                 | International |
| 55 | 10 | 500  | Various (United States, Canad  | High income                 | North America |
| 56 | 9  | 2000 | Malawi                         | Low income                  | Africa        |
| 57 | 9  | 2000 | Malawi                         | Low income                  | Africa        |
| 58 | 10 | 400  | Various (United States, Bulgar | High income                 | International |
| 59 | 5  | 712  | Various (United States, Puertc | High income                 | International |
| 60 | 8  | 100  | Egypt                          | Lower middle income         | Africa        |
| 61 | 10 | 188  | Australia                      | High income                 | Oceania       |
| 62 | 8  | 144  | Various (United States, Belgiu | High income                 | International |

|    | K  | L    | M                                | N                   | O             |
|----|----|------|----------------------------------|---------------------|---------------|
| 63 | 5  | 120  | Brazil                           | Upper middle income | Latin America |
| 64 | 10 | 20   | Belgium                          | High income         | Europe        |
| 65 | 9  | 308  | Nigeria                          | Lower middle income | Africa        |
| 66 | 6  | 300  | Various (United Kingdom, France) | High income         | Europe        |
| 67 | 11 | 432  | Sweden                           | High income         | Europe        |
| 68 | 7  | 24   | Various (United States, Hungary) | High income         | International |
| 69 | 8  | 60   | United States                    | High income         | North America |
| 70 | 10 | 32   | United States                    | High income         | North America |
| 71 | 5  | 100  | Australia                        | High income         | Oceania       |
| 72 | 10 | 200  | Taiwan, China                    | High income         | Asia          |
| 73 | 5  | 168  | Mexico                           | High income         | North America |
| 74 | 8  | 1000 | United States                    | High income         | North America |
| 75 | 8  | 50   | Brazil                           | Upper middle income | Latin America |
| 76 | 8  | 200  | Various (Austria, Germany)       | High income         | Europe        |
| 77 | 1  | 180  | United States                    | High income         | North America |

|    | P  | Q                                                    | R              | S                  | T              |                                |
|----|----|------------------------------------------------------|----------------|--------------------|----------------|--------------------------------|
| 1  |    |                                                      |                |                    |                |                                |
| 2  |    |                                                      |                |                    |                |                                |
| 3  | 1  | <b>Collaborators</b>                                 | <b>Sponsor</b> | <b>Study Types</b> | <b>Phase</b>   | <b>Endpoint classification</b> |
| 4  | 2  | Assistance Publique - Hopitaux de Paris              | Hospital       | Observational      | Not applicable | Pharmacokinetics               |
| 5  | 3  | University of Oulu Oulu University Hospital          | University     | Interventional     | Phase 4        | Efficacy                       |
| 6  | 4  | Ospedale Santa Maria delle Croci                     | Hospital       | Interventional     | Phase 2        | Safety/Efficacy                |
| 7  | 5  | Children's Hospital of Philadelphia Children's Ho    | Hospital       | Interventional     | Phase 2        | Safety/Efficacy                |
| 8  | 6  | Hamilton Health Sciences Corporation Children's      | Hospital       | Interventional     | Phase 4        | Safety/Efficacy                |
| 9  | 7  | National Institute of Allergy and Infectious Disease | NIH            | Interventional     | Phase 4        | Efficacy                       |
| 10 | 8  | University of Oxford KEMRI Wellcome Trust Rese       | University     | Interventional     | Phase 2        | Pharmacokinetics               |
| 11 | 9  | Sunnybrook Health Sciences Centre                    | Hospital       | Interventional     | Not specified  | Efficacy                       |
| 12 | 10 | Centers for Disease Control and Prevention MRC       | CDC            | Interventional     | Phase 2        | Safety/Efficacy                |
| 13 | 11 | Beijing Children's Hospital                          | Hospital       | Interventional     | Phase 4        | Safety/Efficacy                |
| 14 | 12 | University Hospital Inselspital, Berne               | Hospital       | Interventional     | Phase 1        | Pharmacokinetics               |
| 15 | 13 | University Hospital, Ghent University Hospital, A    | Hospital       | Observational      | Not applicable | Pharmacokinetics               |
| 16 | 14 | University of Oxford Mahidol University Wellcor      | University     | Interventional     | Not specified  | Efficacy                       |
| 17 | 15 | Oulu University Hospital                             | University     | Interventional     | Phase 4        | Safety/Efficacy                |
| 18 | 16 | Daniel Benjamin Eunice Kennedy Shriver Nationa       | University     | Observational      | Not applicable | Pharmacokinetics               |
| 19 | 17 | Michael Cohen-Wolkowicz Eunice Kennedy Shriv         | University     | Interventional     | Phase 1        | Pharmacokinetics               |
| 20 | 18 | Khon Kaen University                                 | University     | Interventional     | Not specified  | Efficacy                       |
| 21 | 19 | Cubist Pharmaceuticals LLC                           | Industry       | Interventional     | Phase 1        | Pharmacokinetics               |
| 22 | 20 | Children's Mercy Hospital Kansas City Blue Cross     | Hospital       | Interventional     | Not specified  | Efficacy                       |
| 23 | 21 | Hoffmann-La Roche                                    | Industry       | Observational      | Not applicable | Safety                         |
| 24 | 22 | Region Skane                                         | Hospital       | Interventional     | Not specified  | Efficacy                       |
| 25 | 23 | Cubist Pharmaceuticals LLC                           | Industry       | Interventional     | Phase 3        | Safety                         |
| 26 | 24 | Drexel University The Center for Pediatric Pharm     | University     | Interventional     | Phase 1        | Safety                         |
| 27 | 25 | Bayer                                                | Industry       | Observational      | Not applicable | Safety/Efficacy                |
| 28 | 26 | Children's Hospital of Philadelphia                  | Hospital       | Observational      | Not applicable | Safety/Efficacy                |
| 29 | 27 | Sheba Medical Center                                 | Hospital       | Interventional     | Phase 4        | Efficacy                       |
| 30 | 28 | Beijing Children's Hospital                          | Hospital       | Observational      | Not applicable | Pharmacokinetics               |
| 31 | 29 | Rempex Pharmaceuticals (a wholly owned subsidi       | Industry       | Interventional     | Phase 1        | Safety                         |
| 32 | 30 | Menzies School of Health Research Griffith Univ      | University     | Interventional     | Phase 4        | Safety/Efficacy                |
| 33 | 31 | Michael Cohen-Wolkowicz The EMMES Corpora            | University     | Interventional     | Phase 2-3      | Safety                         |
| 34 |    |                                                      |                |                    |                |                                |
| 35 |    |                                                      |                |                    |                |                                |
| 36 |    |                                                      |                |                    |                |                                |
| 37 |    |                                                      |                |                    |                |                                |
| 38 |    |                                                      |                |                    |                |                                |
| 39 |    |                                                      |                |                    |                |                                |
| 40 |    |                                                      |                |                    |                |                                |
| 41 |    |                                                      |                |                    |                |                                |
| 42 |    |                                                      |                |                    |                |                                |
| 43 |    |                                                      |                |                    |                |                                |
| 44 |    |                                                      |                |                    |                |                                |
| 45 |    |                                                      |                |                    |                |                                |
| 46 |    |                                                      |                |                    |                |                                |
| 47 |    |                                                      |                |                    |                |                                |

|    | P                                                                                | Q                   | R              | S             | T                |
|----|----------------------------------------------------------------------------------|---------------------|----------------|---------------|------------------|
| 32 | University of Malaya   Menzies School of Health Research                         | University          | Interventional | Phase 4       | Efficacy         |
| 33 | Durata Therapeutics Inc., an affiliate of Allergan                               | Industry            | Interventional | Phase 1       | Pharmacokinetics |
| 34 | University of British Columbia                                                   | University          | Interventional | Phase 3       | Efficacy         |
| 35 | Merck Sharp & Dohme Corp.                                                        | Industry            | Interventional | Phase 1       | Pharmacokinetics |
| 36 | St. Justine's Hospital                                                           | Hospital            | Interventional | Phase 1       | Pharmacokinetics |
| 37 | Université Catholique de Louvain                                                 | University          | Interventional | Phase 4       | Pharmacokinetics |
| 38 | Assistance Publique - Hôpitaux de Paris                                          | Hospital            | Interventional | Not specified | Pharmacokinetics |
| 39 | Helsinki University   Foundation for Paediatric Research                         | University          | Interventional | Phase 4       | Safety/Efficacy  |
| 40 | National Taiwan University Hospital                                              | University          | Interventional | Phase 4       | Pharmacokinetics |
| 41 | Chulalongkorn University                                                         | University          | Interventional | Not specified | Efficacy         |
| 42 | University of Pittsburgh   National Institute of Allergy and Infectious Diseases | University          | Interventional | Phase 3       | Safety/Efficacy  |
| 43 | Korea University                                                                 | University          | Interventional | Phase 4       | Efficacy         |
| 44 | Baylor College of Medicine   Forest Laboratories                                 | University          | Interventional | Phase 1-2     | Safety/Efficacy  |
| 45 | Royal College of Surgeons, Ireland   Health Research Board                       | University          | Interventional | Phase 4       | Efficacy         |
| 46 | Ramon Gorter   ZonMw: The Netherlands Organisation for Scientific Research       | University          | Interventional | Phase 4       | Efficacy         |
| 47 | AstraZeneca   PRA Health Sciences                                                | Industry            | Interventional | Phase 2       | Safety/Efficacy  |
| 48 | Aga Khan University                                                              | University          | Interventional | Not specified | Efficacy         |
| 49 | Thammasat University                                                             | University          | Interventional | Phase 4       | Safety/Efficacy  |
| 50 | Basilea Pharmaceutica                                                            | Industry            | Interventional | Phase 1       | Pharmacokinetics |
| 51 | Murdoch Childrens Research Institute   Royal Children's Hospital                 | University          | Interventional | Not specified | Pharmacokinetics |
| 52 | AstraZeneca   PRA Health Sciences                                                | Industry            | Interventional | Phase 2       | Safety/Efficacy  |
| 53 | Durata Therapeutics Inc., an affiliate of Allergan                               | Industry            | Interventional | Phase 3       | Safety/Efficacy  |
| 54 | Cempra Inc   National Institute of Allergy and Infectious Diseases               | Industry            | Interventional | Phase 3       | Efficacy         |
| 55 | Otonomy, Inc.                                                                    | Industry            | Interventional | Phase 3       | Efficacy         |
| 56 | Save the Children   University of North Carolina   UNC Children's Hospital       | Health Organisation | Interventional | Phase 4       | Efficacy         |
| 57 | Save the Children   University of North Carolina   UNC Children's Hospital       | Health Organisation | Interventional | Phase 4       | Efficacy         |
| 58 | Cempra Inc                                                                       | Industry            | Interventional | Phase 2-3     | Safety/Efficacy  |
| 59 | Cempra Inc                                                                       | Industry            | Interventional | Phase 3       | Safety/Efficacy  |
| 60 | Tanta University                                                                 | University          | Interventional | Phase 3       | Efficacy         |
| 61 | Murdoch Childrens Research Institute                                             | University          | Interventional | Not specified | Efficacy         |
| 62 | Astellas Pharma Europe B.V.   Merck Sharp & Dohme                                | Industry            | Interventional | Phase 3       | Safety/Efficacy  |



|    | P                                                  | Q               | R              | S              | T                |
|----|----------------------------------------------------|-----------------|----------------|----------------|------------------|
| 63 | Laboratorios Goulart S.A.                          | Industry        | Interventional | Phase 3        | Safety/Efficacy  |
| 64 | University Hospital, Ghent   Universitair Ziekenhu | University      | Interventional | Phase 4        | Pharmacokinetics |
| 65 | Malaria Consortium   World Health Organization     | Health Organisa | Interventional | Phase 4        | Safety           |
| 66 | PENTA Foundation   St George's, University of Lor  | Health Organisa | Interventional | Phase 2        | Safety/Efficacy  |
| 67 | Sigvard Mì   Istad   Public Health Agency of Swede | University      | Interventional | Phase 4        | Safety/Efficacy  |
| 68 | AstraZeneca   PRA Health Sciences                  | Industry        | Interventional | Phase 2-3      | Safety/Efficacy  |
| 69 | The Medicines Company                              | Industry        | Interventional | Phase 1        | Pharmacokinetics |
| 70 | Theravance Biopharma Antibiotics, Inc.             | Industry        | Interventional | Phase 4        | Pharmacokinetics |
| 71 | The Canberra Hospital                              | Hospital        | Interventional | Phase 2        | Pharmacokinetics |
| 72 | Chang Gung Memorial Hospital                       | Hospital        | Interventional | Phase 4        | Efficacy         |
| 73 | Darier                                             | Industry        | Interventional | Phase 4        | Safety/Efficacy  |
| 74 | Theravance Biopharma Antibiotics, Inc.             | Industry        | Observational  | Not applicable | Safety/Efficacy  |
| 75 | Grupo de Apoio ao Adolescente e a Crianca com      | Hospital        | Observational  | Not applicable | Pharmacokinetics |
| 76 | Infectopharm Arzneimittel GmbH   J&P Medical R     | Industry        | Observational  | Not applicable | Efficacy         |
| 77 | University of Maryland                             | University      | Interventional | Phase 2        | Safety/Efficacy  |



|    | U  | V                        | W                 | X                 | Y          | Z          | AA               | AB            |                         |
|----|----|--------------------------|-------------------|-------------------|------------|------------|------------------|---------------|-------------------------|
| 1  | 1  | Primary outcome variable | PK data collected | First Receive     | Start Date | Completion | Last Updated     | Last Verified | Results First Received  |
| 2  | 2  | PK                       | PK study design   | July 2, 2015      | Sep-15     | Dec-18     | September 1      | Sep-16        | No Study Results Posted |
| 3  | 3  | Efficacy                 | No PK data        | September 2       | Oct-16     | null       | October 12, 2016 | Oct-16        | No Study Results Posted |
| 4  | 4  | Efficacy                 | No PK data        | September 8       | Sep-16     | null       | September 1      | Sep-16        | No Study Results Posted |
| 5  | 5  | Efficacy                 | No PK data        | May 8, 2012       | May-12     | Apr-18     | June 27, 2016    | Jun-16        | No Study Results Posted |
| 6  | 6  | Efficacy                 | No PK data        | March 2, 2011     | Mar-16     | May-18     | March 24, 2016   | Mar-16        | No Study Results Posted |
| 7  | 7  | Efficacy                 | No PK data        | September 1       | Oct-16     | Mar-19     | October 13, 2016 | Oct-16        | No Study Results Posted |
| 8  | 8  | PK                       | PK study design   | April 4, 2016     | Apr-16     | Sep-16     | April 25, 2016   | Apr-16        | No Study Results Posted |
| 9  | 9  | Efficacy                 | No PK data        | September 2       | Oct-16     | Dec-17     | September 2      | Sep-16        | No Study Results Posted |
| 10 | 10 | Efficacy                 | No PK data        | November 17       | Dec-10     | null       | September 1      | Sep-12        | No Study Results Posted |
| 11 | 11 | Efficacy                 | No PK data        | November 25       | Mar-14     | Jul-16     | December 16      | Nov-15        | No Study Results Posted |
| 12 | 12 | PK                       | Primary PK data   | January 26, 2012  | Apr-12     | Apr-18     | December 10      | Dec-15        | No Study Results Posted |
| 13 | 13 | PK                       | PK study design   | May 18, 2015      | May-12     | null       | November 17      | Nov-15        | No Study Results Posted |
| 14 | 14 | Efficacy                 | No PK data        | December 18       | Dec-07     | Sep-10     | June 3, 2008     | Aug-07        | No Study Results Posted |
| 15 | 15 | Efficacy                 | No PK data        | October 17, 2007  | Nov-07     | Dec-09     | October 18, 2007 | Oct-07        | No Study Results Posted |
| 16 | 16 | PK                       | PK study design   | August 17, 2011   | Nov-11     | Feb-17     | February 4, 2016 | Feb-16        | No Study Results Posted |
| 17 | 17 | PK                       | PK study design   | June 12, 2015     | Nov-15     | Dec-17     | August 1, 2016   | Aug-16        | No Study Results Posted |
| 18 | 18 | Efficacy                 | No PK data        | August 18, 2011   | Aug-11     | Dec-20     | August 30, 2016  | Aug-16        | No Study Results Posted |
| 19 | 19 | PK                       | PK study design   | September 2       | Sep-14     | Nov-16     | October 31, 2016 | Oct-16        | No Study Results Posted |
| 20 | 20 | Efficacy                 | No PK data        | March 23, 2009    | Mar-09     | Oct-12     | June 21, 2011    | Jun-11        | No Study Results Posted |
| 21 | 21 | Safety                   | No PK data        | August 23, 2016   | Aug-16     | Dec-16     | September 1      | Sep-16        | No Study Results Posted |
| 22 | 22 | Efficacy                 | No PK data        | January 3, 2011   | Mar-11     | Jun-15     | May 25, 2015     | May-15        | No Study Results Posted |
| 23 | 23 | Safety                   | Secondary PK data | October 9, 2015   | Mar-15     | Jan-18     | October 31, 2016 | Oct-16        | No Study Results Posted |
| 24 | 24 | Safety                   | Primary PK data   | January 12, 2017  | Jan-17     | Dec-18     | September 8      | Sep-16        | No Study Results Posted |
| 25 | 25 | Safety                   | No PK data        | September 1       | Jul-16     | Sep-18     | October 19, 2016 | Oct-16        | No Study Results Posted |
| 26 | 26 | Efficacy                 | No PK data        | November 17       | Jan-14     | Jul-17     | May 6, 2016      | May-16        | No Study Results Posted |
| 27 | 27 | Efficacy                 | No PK data        | August 21, 2013   | Aug-13     | Aug-15     | August 26, 2013  | Aug-14        | No Study Results Posted |
| 28 | 28 | PK                       | PK study design   | May 11, 2016      | Aug-16     | Oct-22     | May 17, 2016     | May-16        | No Study Results Posted |
| 29 | 29 | Safety                   | Primary PK data   | February 17, 2016 | Jul-16     | Sep-19     | October 6, 2016  | Oct-16        | No Study Results Posted |
| 30 | 30 | Efficacy                 | No PK data        | May 5, 2016       | Jun-16     | Dec-20     | October 7, 2016  | Oct-16        | No Study Results Posted |
| 31 | 31 | Safety                   | No PK data        | November 18       | Dec-13     | Sep-17     | August 1, 2016   | Aug-16        | No Study Results Posted |

|    | U        | V                 | W             | X      | Y      | Z             | AA     | AB                      |
|----|----------|-------------------|---------------|--------|--------|---------------|--------|-------------------------|
| 32 | Efficacy | No PK data        | September 2   | Nov-14 | Dec-18 | December 20   | Dec-15 | No Study Results Posted |
| 33 | PK       | PK study design   | February 18,  | Apr-16 | May-17 | October 19, 2 | Oct-16 | No Study Results Posted |
| 34 | Efficacy | No PK data        | May 8, 2006   | Jan-04 | Dec-13 | February 6, 2 | Feb-12 | No Study Results Posted |
| 35 | PK       | PK study design   | April 1, 2016 | May-16 | Feb-18 | October 21, 2 | Oct-16 | No Study Results Posted |
| 36 | PK       | PK study design   | June 2, 2015  | Jan-16 | Dec-17 | April 18, 201 | Apr-16 | No Study Results Posted |
| 37 | PK       | PK study design   | October 1, 20 | Oct-16 | Oct-17 | October 24, 2 | Oct-16 | No Study Results Posted |
| 38 | PK       | PK study design   | February 24,  | Feb-16 | Feb-17 | March 8, 201  | Mar-16 | No Study Results Posted |
| 39 | Efficacy | No PK data        | February 23,  | Feb-12 | Jul-17 | February 19,  | Feb-16 | No Study Results Posted |
| 40 | PK       | PK study design   | August 23, 20 | Jun-06 | Dec-07 | August 23, 20 | Aug-06 | No Study Results Posted |
| 41 | Efficacy | No PK data        | January 30, 2 | Dec-12 | Dec-13 | February 6, 2 | Feb-13 | No Study Results Posted |
| 42 | Efficacy | No PK data        | September 8   | Feb-16 | Sep-20 | October 3, 20 | Oct-16 | No Study Results Posted |
| 43 | Efficacy | No PK data        | December 22   | Apr-07 | Apr-16 | April 8, 2014 | Apr-14 | No Study Results Posted |
| 44 | Safety   | Secondary PK data | December 31   | Jan-15 | Jan-20 | June 24, 201  | Jun-16 | No Study Results Posted |
| 45 | Efficacy | No PK data        | August 9, 20  | Dec-16 | Dec-19 | September 3   | Jul-16 | No Study Results Posted |
| 46 | Efficacy | No PK data        | July 24, 2016 | Dec-16 | Dec-20 | July 26, 2016 | Jul-16 | No Study Results Posted |
| 47 | Safety   | Secondary PK data | May 25, 2015  | Jul-15 | Oct-17 | October 21, 2 | Oct-16 | No Study Results Posted |
| 48 | Efficacy | No PK data        | November 4,   | Nov-14 | Jul-17 | June 3, 2016  | Jun-16 | No Study Results Posted |
| 49 | Efficacy | No PK data        | February 17,  | Jan-12 | Sep-12 | March 13, 20  | Mar-12 | No Study Results Posted |
| 50 | PK       | PK study design   | August 5, 20  | Aug-14 | Jun-17 | October 20, 2 | Oct-16 | No Study Results Posted |
| 51 | PK       | PK study design   | August 5, 20  | Sep-14 | Sep-17 | March 17, 20  | Mar-16 | No Study Results Posted |
| 52 | Safety   | Secondary PK data | June 16, 201  | Sep-15 | Oct-17 | October 21, 2 | Oct-16 | No Study Results Posted |
| 53 | Efficacy | No PK data        | June 8, 2016  | Jun-16 | Jul-18 | June 23, 201  | Jun-16 | No Study Results Posted |
| 54 | Efficacy | No PK data        | August 1, 20  | Aug-14 | Apr-17 | September 2   | Sep-16 | No Study Results Posted |
| 55 | Efficacy | No PK data        | June 13, 201  | Jun-16 | Nov-16 | June 13, 201  | Jun-16 | No Study Results Posted |
| 56 | Efficacy | No PK data        | May 1, 2016   | Jun-16 | Sep-18 | June 10, 201  | Jun-16 | No Study Results Posted |
| 57 | Efficacy | No PK data        | February 3, 2 | Mar-16 | null   | June 10, 201  | Jun-16 | No Study Results Posted |
| 58 | Safety   | No PK data        | November 10   | Mar-16 | Jan-18 | September 1   | Sep-16 | No Study Results Posted |
| 59 | Efficacy | No PK data        | October 5, 20 | Nov-15 | Feb-17 | October 5, 20 | Oct-16 | No Study Results Posted |
| 60 | Efficacy | No PK data        | May 11, 2015  | Jan-15 | Dec-16 | May 9, 2016   | May-16 | No Study Results Posted |
| 61 | Efficacy | No PK data        | January 4, 20 | Jan-15 | Jan-17 | March 16, 20  | Mar-16 | No Study Results Posted |
| 62 | Efficacy | No PK data        | August 11, 20 | Oct-14 | Feb-17 | June 17, 201  | Jun-16 | No Study Results Posted |

1  
2  
3  
4  
5  
6  
7  
8  
9  
10  
11  
12  
13  
14  
15  
16  
17  
18  
19  
20  
21  
22  
23  
24  
25  
26  
27  
28  
29  
30  
31  
32  
33  
34  
35  
36  
37  
38  
39  
40  
41  
42  
43  
44  
45  
46  
47

|    | U        | V                 | W             | X      | Y      | Z             | AA     | AB                      |
|----|----------|-------------------|---------------|--------|--------|---------------|--------|-------------------------|
| 63 | Efficacy | No PK data        | December 14,  | May-10 | Oct-10 | March 18, 20  | Dec-09 | No Study Results Posted |
| 64 | PK       | PK study design   | November 4,   | Apr-15 | Apr-16 | November 4,   | Nov-15 | No Study Results Posted |
| 65 | Safety   | No PK data        | August 17, 20 | Oct-16 | Jul-17 | October 3, 20 | Oct-16 | No Study Results Posted |
| 66 | Efficacy | Secondary PK data | April 7, 2016 | Jul-16 | Mar-18 | May 31, 2016  | May-16 | No Study Results Posted |
| 67 | Efficacy | No PK data        | March 4, 201  | Sep-15 | Oct-16 | October 4, 20 | Oct-16 | No Study Results Posted |
| 68 | Safety   | Secondary PK data | February 23,  | Aug-15 | Oct-17 | October 14, 2 | Oct-16 | No Study Results Posted |
| 69 | PK       | PK study design   | May 7, 2014   | May-14 | Dec-16 | November 4,   | Nov-15 | No Study Results Posted |
| 70 | PK       | PK study design   | December 11   | Dec-14 | Aug-16 | June 24, 201  | Jun-16 | No Study Results Posted |
| 71 | PK       | PK study design   | August 31, 20 | Aug-11 | Jul-12 | September 1   | Aug-11 | No Study Results Posted |
| 72 | Efficacy | No PK data        | November 25   | Aug-10 | Jul-12 | January 14, 2 | Nov-10 | No Study Results Posted |
| 73 | Efficacy | No PK data        | September 3   | Jun-09 | Apr-10 | September 3   | Sep-09 | No Study Results Posted |
| 74 | Efficacy | No PK data        | November 5,   | Nov-14 | Sep-18 | June 29, 201  | Jun-16 | No Study Results Posted |
| 75 | PK       | Primary PK data   | February 24,  | Jan-11 | null   | March 21, 20  | Mar-12 | No Study Results Posted |
| 76 | Efficacy | No PK data        | July 29, 2010 | Aug-10 | null   | February 5, 2 | Feb-16 | No Study Results Posted |
| 77 | Efficacy | Secondary PK data | January 22, 2 | Jul-13 | Dec-21 | May 28, 2015  | May-15 | No Study Results Posted |

|    | AC | AD                 | AE                                                                                                    | AF | AG |
|----|----|--------------------|-------------------------------------------------------------------------------------------------------|----|----|
| 1  | 1  | <b>Primary Com</b> | <b>URL</b>                                                                                            |    |    |
| 2  | 2  | Jul-18             | <a href="https://ClinicalTrials.gov/show/NCT02539407">https://ClinicalTrials.gov/show/NCT02539407</a> |    |    |
| 3  | 3  | Dec-18             | <a href="https://ClinicalTrials.gov/show/NCT02935374">https://ClinicalTrials.gov/show/NCT02935374</a> |    |    |
| 4  | 4  | Sep-18             | <a href="https://ClinicalTrials.gov/show/NCT02899143">https://ClinicalTrials.gov/show/NCT02899143</a> |    |    |
| 5  | 5  | Apr-18             | <a href="https://ClinicalTrials.gov/show/NCT01595529">https://ClinicalTrials.gov/show/NCT01595529</a> |    |    |
| 6  | 6  | Feb-18             | <a href="https://ClinicalTrials.gov/show/NCT02380352">https://ClinicalTrials.gov/show/NCT02380352</a> |    |    |
| 7  | 7  | Jan-19             | <a href="https://ClinicalTrials.gov/show/NCT02891915">https://ClinicalTrials.gov/show/NCT02891915</a> |    |    |
| 8  | 8  | Sep-16             | <a href="https://ClinicalTrials.gov/show/NCT02746276">https://ClinicalTrials.gov/show/NCT02746276</a> |    |    |
| 9  | 9  | Aug-17             | <a href="https://ClinicalTrials.gov/show/NCT02917551">https://ClinicalTrials.gov/show/NCT02917551</a> |    |    |
| 10 | 10 | Jun-13             | <a href="https://ClinicalTrials.gov/show/NCT01243437">https://ClinicalTrials.gov/show/NCT01243437</a> |    |    |
| 11 | 11 | Mar-16             | <a href="https://ClinicalTrials.gov/show/NCT02635191">https://ClinicalTrials.gov/show/NCT02635191</a> |    |    |
| 12 | 12 | Dec-16             | <a href="https://ClinicalTrials.gov/show/NCT01522105">https://ClinicalTrials.gov/show/NCT01522105</a> |    |    |
| 13 | 13 | Dec-17             | <a href="https://ClinicalTrials.gov/show/NCT02456974">https://ClinicalTrials.gov/show/NCT02456974</a> |    |    |
| 14 | 14 | Sep-10             | <a href="https://ClinicalTrials.gov/show/NCT00579956">https://ClinicalTrials.gov/show/NCT00579956</a> |    |    |
| 15 | 15 | null               | <a href="https://ClinicalTrials.gov/show/NCT00545961">https://ClinicalTrials.gov/show/NCT00545961</a> |    |    |
| 16 | 16 | Feb-17             | <a href="https://ClinicalTrials.gov/show/NCT01431326">https://ClinicalTrials.gov/show/NCT01431326</a> |    |    |
| 17 | 17 | Nov-17             | <a href="https://ClinicalTrials.gov/show/NCT02475876">https://ClinicalTrials.gov/show/NCT02475876</a> |    |    |
| 18 | 18 | Dec-20             | <a href="https://ClinicalTrials.gov/show/NCT01420341">https://ClinicalTrials.gov/show/NCT01420341</a> |    |    |
| 19 | 19 | Nov-16             | <a href="https://ClinicalTrials.gov/show/NCT02266706">https://ClinicalTrials.gov/show/NCT02266706</a> |    |    |
| 20 | 20 | Sep-12             | <a href="https://ClinicalTrials.gov/show/NCT00867789">https://ClinicalTrials.gov/show/NCT00867789</a> |    |    |
| 21 | 21 | Dec-16             | <a href="https://ClinicalTrials.gov/show/NCT02879981">https://ClinicalTrials.gov/show/NCT02879981</a> |    |    |
| 22 | 22 | Jun-15             | <a href="https://ClinicalTrials.gov/show/NCT01269541">https://ClinicalTrials.gov/show/NCT01269541</a> |    |    |
| 23 | 23 | Jan-18             | <a href="https://ClinicalTrials.gov/show/NCT02276482">https://ClinicalTrials.gov/show/NCT02276482</a> |    |    |
| 24 | 24 | Dec-18             | <a href="https://ClinicalTrials.gov/show/NCT02663596">https://ClinicalTrials.gov/show/NCT02663596</a> |    |    |
| 25 | 25 | Sep-17             | <a href="https://ClinicalTrials.gov/show/NCT02555059">https://ClinicalTrials.gov/show/NCT02555059</a> |    |    |
| 26 | 26 | Apr-17             | <a href="https://ClinicalTrials.gov/show/NCT02297815">https://ClinicalTrials.gov/show/NCT02297815</a> |    |    |
| 27 | 27 | Dec-14             | <a href="https://ClinicalTrials.gov/show/NCT02224040">https://ClinicalTrials.gov/show/NCT02224040</a> |    |    |
| 28 | 28 | Aug-22             | <a href="https://ClinicalTrials.gov/show/NCT02775968">https://ClinicalTrials.gov/show/NCT02775968</a> |    |    |
| 29 | 29 | Aug-19             | <a href="https://ClinicalTrials.gov/show/NCT02687906">https://ClinicalTrials.gov/show/NCT02687906</a> |    |    |
| 30 | 30 | Dec-19             | <a href="https://ClinicalTrials.gov/show/NCT02783859">https://ClinicalTrials.gov/show/NCT02783859</a> |    |    |
| 31 | 31 | Apr-17             | <a href="https://ClinicalTrials.gov/show/NCT01994993">https://ClinicalTrials.gov/show/NCT01994993</a> |    |    |

|    | AC | AD     | AE                                          | AF | AG |
|----|----|--------|---------------------------------------------|----|----|
| 1  |    |        |                                             |    |    |
| 2  |    |        |                                             |    |    |
| 3  | 32 | Dec-17 | https://ClinicalTrials.gov/show/NCT02258763 |    |    |
| 4  | 33 | May-17 | https://ClinicalTrials.gov/show/NCT02688790 |    |    |
| 5  |    |        |                                             |    |    |
| 6  | 34 | Dec-12 | https://ClinicalTrials.gov/show/NCT00323219 |    |    |
| 7  | 35 | Feb-18 | https://ClinicalTrials.gov/show/NCT02750761 |    |    |
| 8  |    |        |                                             |    |    |
| 9  | 36 | Dec-17 | https://ClinicalTrials.gov/show/NCT02466438 |    |    |
| 10 | 37 | Sep-17 | https://ClinicalTrials.gov/show/NCT02260102 |    |    |
| 11 | 38 | Jun-16 | https://ClinicalTrials.gov/show/NCT02694458 |    |    |
| 12 | 39 | Feb-17 | https://ClinicalTrials.gov/show/NCT01540838 |    |    |
| 13 | 40 | null   | https://ClinicalTrials.gov/show/NCT00368498 |    |    |
| 14 |    |        |                                             |    |    |
| 15 | 41 | Dec-13 | https://ClinicalTrials.gov/show/NCT01785641 |    |    |
| 16 | 42 | Sep-20 | https://ClinicalTrials.gov/show/NCT02554383 |    |    |
| 17 | 43 | Mar-16 | https://ClinicalTrials.gov/show/NCT01265173 |    |    |
| 18 | 44 | Jan-17 | https://ClinicalTrials.gov/show/NCT02335905 |    |    |
| 19 |    |        |                                             |    |    |
| 20 | 45 | Dec-19 | https://ClinicalTrials.gov/show/NCT02922686 |    |    |
| 21 | 46 | Dec-20 | https://ClinicalTrials.gov/show/NCT02848820 |    |    |
| 22 | 47 | Oct-17 | https://ClinicalTrials.gov/show/NCT02475733 |    |    |
| 23 |    |        |                                             |    |    |
| 24 | 48 | May-17 | https://ClinicalTrials.gov/show/NCT02372461 |    |    |
| 25 | 49 | Aug-12 | https://ClinicalTrials.gov/show/NCT01553006 |    |    |
| 26 | 50 | Mar-17 | https://ClinicalTrials.gov/show/NCT02527681 |    |    |
| 27 |    |        |                                             |    |    |
| 28 | 51 | Sep-17 | https://ClinicalTrials.gov/show/NCT02210169 |    |    |
| 29 | 52 | Oct-17 | https://ClinicalTrials.gov/show/NCT02497781 |    |    |
| 30 | 53 | Apr-18 | https://ClinicalTrials.gov/show/NCT02814916 |    |    |
| 31 | 54 | Apr-17 | https://ClinicalTrials.gov/show/NCT02210325 |    |    |
| 32 |    |        |                                             |    |    |
| 33 | 55 | Nov-16 | https://ClinicalTrials.gov/show/NCT02801370 |    |    |
| 34 | 56 | Aug-18 | https://ClinicalTrials.gov/show/NCT02760420 |    |    |
| 35 | 57 | Aug-18 | https://ClinicalTrials.gov/show/NCT02678195 |    |    |
| 36 | 58 | Dec-17 | https://ClinicalTrials.gov/show/NCT02605122 |    |    |
| 37 |    |        |                                             |    |    |
| 38 | 59 | Feb-17 | https://ClinicalTrials.gov/show/NCT02570490 |    |    |
| 39 | 60 | Dec-16 | https://ClinicalTrials.gov/show/NCT02443285 |    |    |
| 40 | 61 | Jan-17 | https://ClinicalTrials.gov/show/NCT02334124 |    |    |
| 41 | 62 | Feb-17 | https://ClinicalTrials.gov/show/NCT02218372 |    |    |
| 42 |    |        |                                             |    |    |

1  
2  
3  
4  
5  
6  
7  
8  
9  
10  
11  
12  
13  
14  
15  
16  
17  
18  
19  
20  
21  
22  
23  
24  
25  
26  
27  
28  
29  
30  
31  
32  
33  
34  
35  
36  
37  
38  
39  
40  
41  
42  
43  
44  
45  
46  
47

|    | AC     | AD                                                                                                            | AE | AF | AG |
|----|--------|---------------------------------------------------------------------------------------------------------------|----|----|----|
| 63 | Jul-10 | <a href="https://ClinicalTrials.gov/show/NCT01032499">https://ClinicalTrials.gov/show/NCT01032499</a>         |    |    |    |
| 64 | Feb-16 | <a href="https://ClinicalTrials.gov/show/NCT02598362">https://ClinicalTrials.gov/show/NCT02598362</a>         |    |    |    |
| 65 | Mar-17 | <a href="https://ClinicalTrials.gov/show/NCT02878031">https://ClinicalTrials.gov/show/NCT02878031</a>         |    |    |    |
| 66 | Dec-17 | <a href="https://ClinicalTrials.gov/show/NCT02790996">https://ClinicalTrials.gov/show/NCT02790996</a>         |    |    |    |
| 67 | Oct-16 | <a href="https://ClinicalTrials.gov/show/NCT02712307">https://ClinicalTrials.gov/show/NCT02712307</a>         |    |    |    |
| 68 | Oct-17 | <a href="https://ClinicalTrials.gov/show/NCT02424734">https://ClinicalTrials.gov/show/NCT02424734</a>         |    |    |    |
| 69 | Dec-16 | <a href="https://ClinicalTrials.gov/show/NCT02134301">https://ClinicalTrials.gov/show/NCT02134301</a>         |    |    |    |
| 70 | Aug-16 | <a href="https://ClinicalTrials.gov/show/NCT02013141">https://ClinicalTrials.gov/show/NCT02013141</a>         |    |    |    |
| 71 | Jul-12 | <a href="https://ClinicalTrials.gov/show/NCT01427842">https://ClinicalTrials.gov/show/NCT01427842</a>         |    |    |    |
| 72 | Jun-11 | <a href="https://ClinicalTrials.gov/show/NCT01278017">https://ClinicalTrials.gov/show/NCT01278017</a>         |    |    |    |
| 73 | Feb-10 | <a href="https://ClinicalTrials.gov/show/NCT00988026">https://ClinicalTrials.gov/show/NCT00988026</a>         |    |    |    |
| 74 | Jun-18 | <a href="https://ClinicalTrials.gov/show/NCT02288234">https://ClinicalTrials.gov/show/NCT02288234</a>         |    |    |    |
| 75 | null   | <a href="https://ClinicalTrials.gov/show/NCT01304459">https://ClinicalTrials.gov/show/NCT01304459</a>         |    |    |    |
| 76 | Dec-16 | <a href="https://ClinicalTrials.gov/show/NCT01173575">https://ClinicalTrials.gov/show/NCT01173575</a>         |    |    |    |
| 77 | Dec-19 | <a href="https://clinicaltrials.gov/ct2/show/NCT01778634">https://clinicaltrials.gov/ct2/show/NCT01778634</a> |    |    |    |



# BMJ Open

## A global shortage of neonatal and pediatric antibiotic trials: rapid review.

|                                 |                                                                                                                                                                                                                                                                                                                                                                                                                                                                                                                                                                                                                                                                                                                                                                                                     |
|---------------------------------|-----------------------------------------------------------------------------------------------------------------------------------------------------------------------------------------------------------------------------------------------------------------------------------------------------------------------------------------------------------------------------------------------------------------------------------------------------------------------------------------------------------------------------------------------------------------------------------------------------------------------------------------------------------------------------------------------------------------------------------------------------------------------------------------------------|
| Journal:                        | <i>BMJ Open</i>                                                                                                                                                                                                                                                                                                                                                                                                                                                                                                                                                                                                                                                                                                                                                                                     |
| Manuscript ID                   | bmjopen-2017-016293.R3                                                                                                                                                                                                                                                                                                                                                                                                                                                                                                                                                                                                                                                                                                                                                                              |
| Article Type:                   | Research                                                                                                                                                                                                                                                                                                                                                                                                                                                                                                                                                                                                                                                                                                                                                                                            |
| Date Submitted by the Author:   | 17-Aug-2017                                                                                                                                                                                                                                                                                                                                                                                                                                                                                                                                                                                                                                                                                                                                                                                         |
| Complete List of Authors:       | Thompson, Georgina; St George's University of London, Infection and Immunity; University of Exeter Medical School<br>Barker, Charlotte; St George's University of London, Infection and Immunity; University College London Institute of Child Health<br>Folgori, Laura; St George's University of London, Paediatric Infectious Diseases Research Group<br>Bielicki, Julia; St George's University London, Division of Clinical Sciences; University of Basel Children's Hospital<br>Bradley, John; University of California San Diego School of Medicine, Department of Pediatrics<br>Lutsar, Irja; University of Tartu, Department of Medical Microbiology<br>sharland, mike; St George's University of London, Infection and Immunity; St Georges Hospital, Paediatric Infectious Diseases Unit |
| <b>Primary Subject Heading</b>: | Paediatrics                                                                                                                                                                                                                                                                                                                                                                                                                                                                                                                                                                                                                                                                                                                                                                                         |
| Secondary Subject Heading:      | Infectious diseases                                                                                                                                                                                                                                                                                                                                                                                                                                                                                                                                                                                                                                                                                                                                                                                 |
| Keywords:                       | Paediatric infectious disease & immunisation < PAEDIATRICS, INFECTIOUS DISEASES, PAEDIATRICS                                                                                                                                                                                                                                                                                                                                                                                                                                                                                                                                                                                                                                                                                                        |
|                                 |                                                                                                                                                                                                                                                                                                                                                                                                                                                                                                                                                                                                                                                                                                                                                                                                     |

SCHOLARONE™  
Manuscripts

# A global shortage of neonatal and pediatric antibiotic trials: rapid review.

G. Thompson<sup>1,2</sup>, C. I. Barker<sup>1,3,4</sup>, L. Folgori<sup>1</sup>, J. A. Bielicki<sup>1,5</sup>, J. S. Bradley<sup>6,7</sup>, I. Lutsar<sup>8</sup>, M. Sharland<sup>1,4</sup>

<sup>1</sup>Paediatric Infectious Diseases Research Group, Institute for Infection and Immunity, St George's University of London, London, UK

<sup>2</sup>University of Exeter, Exeter, UK

<sup>3</sup>Inflammation, Infection and Rheumatology Section, UCL Great Ormond Street Institute of Child Health, 30 Guilford Street, London, UK

<sup>4</sup>St George's University Hospitals NHS Foundation Trust, Blackshaw Road, London, UK

<sup>5</sup>Paediatric Pharmacology and Pharmacometrics, University of Basel Children's Hospital, Basel, Switzerland

<sup>6</sup>Department of Pediatrics, School of Medicine, University of California San Diego, CA, United States

<sup>7</sup>Rady Children's Hospital San Diego, San Diego, CA, United States

<sup>8</sup>Department of Medical Microbiology, University of Tartu, Tartu, Estonia

## Corresponding author

Georgina Thompson

Paediatric Infectious Diseases Research Group

St George's, University of London

Jenner Wing, Level 2, Room 2.216F, Mail Point J2C

London SW17 0RE

Telephone: 07880325494

Email: gt274@exeter.ac.uk

| **Word count:** 2434



## ABSTRACT

**Objectives:** There have been few clinical trials (CTs) on antibiotics which inform neonatal and pediatric drug labelling. The rate of unlicensed and off-label prescribing in pediatrics remains high. It is unclear whether the current neonatal and pediatric antibiotic research pipeline is adequate to inform optimal drug dosing. Using the ClinicalTrials.gov registry, this review aims to establish the current global status of antibiotic CTs in children up to 18 years of age.

**Methods:** Studies were identified using key word searches of the ClinicalTrials.gov registry, and were manually filtered using pre-specified inclusion/exclusion criteria.

**Results:** 76 registered open CTs of antibiotics in children were identified globally; 23 (30%) were recruiting newborns (only 8 (11%) included preterm neonates), 52 (68%) infants and toddlers, 58 (76%) children, and 54 (71%) adolescents. The majority of registered trials were late phase (10 (15%) Phase 3 and 23 (35%) Phase 4/pharmacovigilance). Two-thirds were sponsored by non-profit organisations, compared to pharmaceutical companies (50 (66%) vs. 26 (34%) respectively). A greater proportion of non-profit funded trials were efficacy-based strategic trials (n= 34, 68%), in comparison to industry-led trials, which were most often focused on safety or pharmacokinetic data (n=17, 65%). Only 2 of the 37 antibiotics listed on the May 2016 Pew Charitable Trusts antibiotic development pipeline, currently being studied in adults, appear to be currently recruiting in open pediatric CTs.

**Conclusions:** This review highlights that very few pediatric antibiotic CTs are being conducted globally, especially in neonates. There is a striking disparity noted between antibiotic drug development programmes in adults and children.

### Strengths and limitations of this study

- A narrative literature review of registered clinical trials in children.
- Explicit reproducible methodology.
- Search strategy limited to ClinicalTrials.gov and EudraCT. Entirety of clinical research in this field might not have been captured.
- Search strategy was limited to open clinical trials. Active but not yet recruiting trials were not captured.

## INTRODUCTION

Widespread unlicensed and off-label prescribing in pediatrics persists – as high as 11.4% and 46.5%, respectively – yet the paucity of clinical research involving children that is conducted to inform optimal drug dosing, licensing and labelling remains a problem.[1] For certain medicines, drug efficacy can be extrapolated from adult data provided that the pathology and drug exposure are the same, or sufficiently similar in children as in adults.[2,3]. Although differences in drug

1  
2  
3 pharmacokinetics (PK) in neonates and children can lead to adverse reactions that are not seen in  
4 adult populations, these are very rare.[4] Suboptimal antibiotic dosing, including under- and over-  
5 dosing, can lead to toxicity, treatment failure, and may drive antimicrobial resistance by encouraging  
6 selection pressures on drug-resistant strains of bacteria.[5]  
7  
8  
9

10 Since antibiotics are the most commonly prescribed medicines in children, it is important to  
11 maximize our understanding of their PK profiles to help determine optimal drug dosing and  
12 ultimately to improve outcomes.[6] In the last decade several initiatives have been established to  
13 encourage pediatric medicines research, bridging the gap between adult and pediatric drug  
14 development plans. Such initiatives include the Pediatric Regulation (Pediatric Investigation Plans  
15 (PIPs), introduced by the European Medicines Agency (EMA),[7] and Pediatric Study Plans (PSPs),  
16 by the U.S. Food and Drug Administration (FDA)).[8] Despite this, there have been few advances in  
17 antibiotic development for this population.[9]  
18  
19  
20  
21  
22  
23

24 The global status of clinical research on antibiotics in pediatrics is unknown. Using registered  
25 records of clinical trials (CTs) on *ClinicalTrials.gov*, this review aims (i) to summarise the current  
26 global status of registered antibiotic research in children and neonates, and (ii) to stimulate  
27 discussion and collaboration among the relevant stakeholders on the neglect of antibiotic research  
28 in children.  
29  
30  
31  
32  
33  
34

## 35 **METHODS**

### 36 **Data sources**

37 The *ClinicalTrials.gov* registry (last accessed 8<sup>th</sup> November 2016) is an international platform for the  
38 registration of CTs. It is a web-based registry, developed in 2000 by the National Institutes of Health  
39 (NIH) and the FDA, to which trials from 50 states and 163 countries around the world are registered.  
40 Information provided for each trial is updated periodically by the trial's sponsoring organisation. The  
41 database has a specific child filter, which uses a key word paradigm to select all registered trials  
42 recruiting patients/participants up to 18 years of age.  
43  
44  
45  
46  
47  
48

### 49 **Study selection**

50 Our records were identified using suitable key word searches, in which the final search terms were  
51 (antimicrobial\* OR antibiotic\* OR anti-infective agent\*) AND Child AND Open Studies. All identified  
52 trials were filtered manually using inclusion and exclusion criteria. Interventional and observational  
53 trials on antimicrobials recruiting children up to 18 years of age were considered eligible for  
54 inclusion. No specific temporal filter was applied since only open or ongoing clinical trials were of  
55 interest. The following records, which were not investigating one or more antibiotics, were excluded:  
56  
57  
58  
59  
60

1  
2  
3 trials of antiseptics, antifungals, antiprotozoals, antivirals, and pro- or pre- biotics. The following  
4 records, which were investigating an antibiotic were excluded: trials involving tuberculosis, malaria,  
5 cystic fibrosis, HIV, febrile neutropenic patients, topical or inhalational treatments, prophylactic  
6 antibiotics, or records investigating alternative use for antibiotics (for example as an anti-  
7 inflammatory agent).  
8  
9

10  
11  
12 The searches were conducted by GT. All eligible records were identified via manual filtering by GT  
13 CIB, LF and MS, and any disagreements regarding inclusion and exclusion of records were  
14 resolved through discussion.  
15  
16

### 17 18 **Data extraction**

19 The following information was collected from the included records: unique NCT number, recruitment  
20 status, study design, trial phase, study sponsor, age group and sex eligibility, clinical indication,  
21 geographic region of recruitment, antibiotic being investigated, and endpoint classification.  
22 Outcomes were categorised as safety, efficacy or PK. Economic setting (based on geographic  
23 region of recruitment) was classified using The World Bank classification to differentiate between  
24 Low Income Countries (LICs), Lower Middle Income Countries (LMICs), Upper Middle Income  
25 Countries (UMICs), and High Income Countries (HICs).[10]  
26  
27  
28  
29  
30  
31

32 The specific class of antibiotic studied in each trial was identified and classified using the World  
33 Health Organisation (WHO) ATC/DDD index.[11] To investigate whether novel antibiotics are being  
34 studied in pediatric populations, the antibiotics currently studied in children were compared with the  
35 *Pew Charitable Trusts Antibiotics Currently in Clinical Development* pipeline, which identifies novel  
36 antibiotics currently under development for the U.S. market.[12]  
37  
38  
39  
40  
41

### 42 43 **RESULTS**

44 Our search identified 1056 records. 603 records were excluded on title because they were studies  
45 not involving an antimicrobial. 453 records were investigating one or more antimicrobials and  
46 recruiting children below 18 years of age. Among the 195 trials investigating antibiotics, 76 fulfilled  
47 our inclusion and exclusion criteria and were included in the final analysis. Reasons for exclusion  
48 are summarised in Figure 1. Details of included studies can be found in Supplementary file 1.  
49  
50  
51

52 All 76 CTs identified were open as of 8<sup>th</sup> November 2016, and 63 (83%) of these were recognised  
53 as recruiting participants on this date (Table 1). All trials stated recruitment of both male and female  
54 participants.  
55  
56  
57  
58  
59  
60

**Table 1.** Characteristics of clinical trials.

| Characteristic                 | Category                                   | Number of studies, n (%) |
|--------------------------------|--------------------------------------------|--------------------------|
| <b>Age group</b>               | Preterm neonates                           | 1 (1) <sup>a</sup>       |
|                                | Neonates (total)                           | 23 (30)                  |
|                                | Infants and toddlers                       | 52 (68)                  |
|                                | Children                                   | 58 (76)                  |
|                                | Adolescents                                | 54 (71)                  |
| <b>Recruitment status</b>      | Recruiting                                 | 63 (83)                  |
|                                | Not yet recruiting                         | 13 (17)                  |
| <b>Study design</b>            | Interventional                             | 66 (87)                  |
|                                | Observational                              | 10 (13)                  |
| <b>Trial phase<sup>b</sup></b> | Phase 1                                    | 10 (15)                  |
|                                | Phase 1-2                                  | 1 (2)                    |
|                                | Phase 2                                    | 9 (14)                   |
|                                | Phase 2-3                                  | 3 (5)                    |
|                                | Phase 3                                    | 10 (15)                  |
|                                | Phase 4                                    | 23 (39)                  |
|                                | Not specified                              | 10 (15)                  |
| <b>Sponsor</b>                 | Industry                                   | 26 (34)                  |
|                                | Non-profit                                 | 50 (66)                  |
| <b>Geographic region</b>       | Africa                                     | 8 (11)                   |
|                                | Asia                                       | 16 (21)                  |
|                                | Europe                                     | 22 (29)                  |
|                                | Latin America                              | 6 (8)                    |
|                                | North America                              | 34 (45)                  |
|                                | Oceania                                    | 5 (7)                    |
| <b>Antibiotic class</b>        | J01A Tetracycline                          | 4 (5)                    |
|                                | J01C Beta-lactam, Penicillin               | 25 (33)                  |
|                                | J01D Other Beta-lactam                     | 22 (29)                  |
|                                | J01E Sulfonamides and trimethoprim         | 7 (9)                    |
|                                | J01F Macrolide, Lincosamide, Streptogramin | 14 (18)                  |
|                                | J01G Aminoglycoside                        | 2 (3)                    |
|                                | J01M Quinolone                             | 8 (11)                   |
|                                | J01X Other antibiotic classes <sup>c</sup> | 21 (28)                  |
|                                | J01 Not specified                          | 2 (3)                    |

Totals for Age group, Geographic region, and Antibiotic class do not add up to total number of clinical trials (76) as some trials contributed to more than one sub group.

<sup>a</sup> 7 further trials mentioned inclusion of preterm babies in the inclusion criteria.

<sup>b</sup> Trial phase % based on percentage of interventional trials.

<sup>c</sup> J01X includes glycopeptides, polymyxins, imidazole and nitrofurantoin derivatives.

### Age group

Twenty three of the 76 trials (30%) were recruiting newborns (0 to 28 days). One of these 23 trials focused solely on recruiting preterm newborns (a further 7 CTs mentioned inclusion of preterm newborns in inclusion criteria). Of the remaining records, 52 (68%) were recruiting infants and toddlers (28 days to 23 months), 58 (76%) children (2 to 11 years), and 54 (71%) adolescents (11 up to 18 years). 29 (38%) trials did not focus solely on the recruitment of children or neonates, with age ranges also spanning across adult populations.

### Study type

Interventional trials were most frequently identified (n=66, 87%) with only 10 (13%) observational trials noted. Of the interventional trials, the majority were in the later stages of development; 10 (13%) in Phase 1, 1 (2%) between Phase 1 and 2, 9 (14%) in Phase 2, 3 (5%) between Phase 2 and 3, 10 (15%) in Phase 3 and 23 (35%) in Phase 4. In 10 (15%) cases, a trial phase was not specified.

### Sponsor and Endpoint Classification

Fifty trials (66%) were sponsored by non-profit organisations (being university, hospital or government funded), and 26 sponsored by industry (34%). The endpoint classification of the majority of trials (n=43, 57%) was reported as efficacy (Table 2). A greater proportion (n=34, 68%) of non-profit studies measured the efficacy of the drugs as the primary endpoint, with less emphasis on collection of PK or safety data (n=16, 32%). In comparison pharmaceutical-led trials focussed on early PK and safety studies over the drug's efficacy (n=17, 65% vs. n=9, 35% respectively).

**Table 2.** Clinical trial endpoint classification of identified clinical trials stratified by trial sponsor. Endpoint classification determined by planned primary outcomes.

| Endpoint classification | Industry | Non-profit | Total (%) |
|-------------------------|----------|------------|-----------|
| Efficacy                | 9        | 34         | 43 (57)   |
| Safety                  | 10       | 2          | 12 (16)   |
| PK                      | 7        | 14         | 21 (28)   |

### Geographic region

The most frequently recruiting geographic region was North America (n=34, 45%). 22 (29%) trials recruiting in Europe and 16 (21%) in Asia were identified, 6 (8%) in Latin America, 8 (11%) in Africa, and 5 (7%) in Oceania. Most trials were recruiting in HICs (n=54, 71%), with fewer trials recruiting in LICs (n=4, 5%), LMICs (n=4, 5%), UMICs (n=11, 14%) or a combination of UMICs and HICs (n=3, 4%).

### Indication

The most common treatment indications investigated were lower respiratory tract infection (n=12, 16%) and sepsis (n=11, 14%), followed by upper respiratory tract infection (n=8, 11%), intra-abdominal infection (IAI) (n=8, 11%), urinary tract infection (UTI) (n=7, 9%), complicated skin and soft tissue infection (cSSTI) (n=6, 8%), CNS infection (n=3, 4%), and bone and joint infection (n=1, 1%) (Table 3).

**Table 3.** Clinical indication of identified clinical trials stratified by age group being recruited.

| Indication                        | Total (%) | Age group        |                       |                      |          |             |
|-----------------------------------|-----------|------------------|-----------------------|----------------------|----------|-------------|
|                                   |           | Preterm neonates | Neonates <sup>a</sup> | Infants and toddlers | Children | Adolescents |
| Unspecified Bacterial Infection   | 18 (24)   | -                | 11                    | 15                   | 15       | 14          |
| Lower Respiratory Tract Infection | 12 (16)   | 1                | 3                     | 12                   | 13       | 5           |
| Sepsis                            | 11 (14)   | -                | 6                     | 9                    | 9        | 11          |
| Upper Respiratory Tract           | 8 (11)    | -                | 1                     | 5                    | 9        | 7           |
| Intra-abdominal Infection         | 8 (11)    | -                | 3                     | 5                    | 5        | 7           |
| Urinary Tract Infection           | 7 (9)     | -                | 2                     | 6                    | 7        | 6           |
| Skin and Soft Tissue Infection    | 6 (8)     | -                | 3                     | 4                    | 4        | 8           |
| CNS infection                     | 3 (4)     | -                | 1                     | 4                    | 4        | 4           |
| Bone and Joint Infection          | 1 (1)     | -                | -                     | 1                    | 1        | 1           |
|                                   |           | 1                | 30                    | 61                   | 67       | 63          |

Age group totals do not add up to total number of clinical trials (76) as some trials contributed to more than one age group.

<sup>a</sup> refers to total number of preterm and term neonates.

### Antibiotic class

The majority of antibiotics being investigated were beta-lactams (n=47, 62%), followed by other antibiotic classes (J01X, including vancomycin, telavancin and dalbavancin) (n=21, 28%). Macrolides or lincosamides (J01F) were the next most commonly studied antibiotic classes (n=14, 18%). Very few trials were investigating of tetracyclines (J01A) (n=4, 5%), Sulphonamides and trimethoprim (J01E) (n=7, 9%), aminoglycosides (J01G) (n=2, 3%), or quinolones (J01M) (n=8, 11%). 2 CTs (3%) did not specify the class of antibiotic being investigated. 16 (21%) trials were investigating more than one antibiotic; these trials counted towards more than one J01 category. The breakdown of J01 categories, as per WHO ATC/DDD classification,[11] is described in Table 1.

### Antibiotic pipeline

Of the 37 antibiotics listed in the May 2016 edition of the Pew Charitable Trusts Antibiotic Pipeline (last accessed 10th June 2016),[12] as noted by the EMA Opinions and Decisions on Pediatric Investigation Plans, 5 had an agreed PIP: Imipenem/Cilastatin+Relebactam, Cadazolid, Carbavance (Meropenem+Vaborbactam), Eravacycline, and Solithromycin.[8] As of 8th November 2016, our search found that only 2 of these 37 antibiotics listed (Carbavance and Solithromycin) were being investigated in 1 and 2 on-going CTs in pediatric patients, respectively (Table 4). A PIP was agreed for Carbavance in 2015 for treatment of Gram-negative infections, and for Solithromycin in 2016 for the treatment of gonococcal infection, and later for treatment of anthrax, tularaemia, and bacterial pneumonia. PIPs were agreed in 2015 for treatment of UTI and complicated IAI with Eravacycline, and in 2016 for treatment of Clostridium difficile infection with Cadazolid and of Gram-negative bacterial infection with Imipenem/Cilastatin+Relebactam.[13] Despite this, we could not identify any registered trials of these antibiotics in our search.



**Table 4.** Comparison of antibiotic development pipeline in adults and children. Adapted from Pew Charitable Trusts “Antibiotics currently in clinical development” pipeline (last accessed October 2016).[12]

| Antibiotic   | Phase   | Manufacturer                                     | Indication                                  | Drug development in Adults | Pediatric Investigation Plan for drug development in Children | Number of open clinical trials in children |
|--------------|---------|--------------------------------------------------|---------------------------------------------|----------------------------|---------------------------------------------------------------|--------------------------------------------|
| WCK 4873     | Phase 1 | Wockhardt Ltd.                                   | Bacterial infection                         | ✓                          | -                                                             | -                                          |
| MGB – BP – 3 | Phase 1 | MGB Pharma Ltd.                                  | <i>Clostridium difficile</i> infection      | ✓                          | -                                                             | -                                          |
| OP0595       | Phase 1 | Meiji Seika Pharma Co.<br>Fedora Pharmaceuticals | Bacterial infection                         | ✓                          | -                                                             | -                                          |
| BAL30072     | Phase 1 | Basilea Pharmaceuticals                          | Multidrug resistant gram negatives          | ✓                          | -                                                             | -                                          |
| CRS3123      | Phase 1 | Crestone Inc.                                    | <i>Clostridium difficile</i> infection      | ✓                          | -                                                             | -                                          |
| LCB01 – 0371 | Phase 1 | Legochem Biosciences Inc.                        | Bacterial infection                         | ✓                          | -                                                             | -                                          |
| TD – 1607    | Phase 1 | Theravance Biopharma Inc.                        | Acute skin infection, HAP, VAP, bacteraemia | ✓                          | -                                                             | -                                          |
| WCK 2349     | Phase 1 | Wockhardt Ltd.                                   | Bacterial infection                         | ✓                          | -                                                             | -                                          |
| WCK 771      | Phase 1 | Wockhardt Ltd.                                   | Bacterial infection                         | ✓                          | -                                                             | -                                          |

|                       |         |                                  |                                                                                    |   |   |   |
|-----------------------|---------|----------------------------------|------------------------------------------------------------------------------------|---|---|---|
| Zidebactam+Cefepime   | Phase 1 | Wockhardt Ltd.                   | cUTI, HAP, VAP                                                                     | ✓ | - | - |
| TP – 271              | Phase 1 | Tetraphase Pharmaceuticals Inc.  | CAP                                                                                | ✓ | - | - |
| Aztreonam – Avibactam | Phase 2 | Astrazeneca PLC<br>Allergan PLC  | cIAI                                                                               | ✓ | - | - |
| MRX – 1               | Phase 2 | MicRx Pharmaceuticals Inc.       | Acute skin infection (systemic)                                                    | ✓ | - | - |
| Debio 1450            | Phase 2 | Debiopharm International SA      | Acute skin infection, Staphylococcus spp. associated osteomyelitis                 | ✓ | - | - |
| ETX0914               | Phase 2 | Entasis Therapeutics Inc.        | Uncomplicated gonorrhoea                                                           | ✓ | - | - |
| POL7080               | Phase 2 | Polyphor Ltd.                    | Pseudomonas spp. associated VAP, lower respiratory tract infection, bronchiectasis | ✓ | - | - |
| Brilacidin            | Phase 2 | Cellceutix Corporation           | Acute skin infection (systemic)                                                    | ✓ | - | - |
| Ceftaroline+Avibactam | Phase 2 | AstraZeneca PLC<br>Allergan PLC  | Bacterial infection                                                                | ✓ | - | - |
| CG400549              | Phase 2 | Crystal Genomics Inc.            | Acute skin infection, osteomyelitis                                                | ✓ | - | - |
| Finafloxacin          | Phase 2 | MerLion Pharmaceuticals Pte Ltd. | cUTI, cIAI, acute skin infection, pyelonephritis                                   | ✓ | - | - |

|                                  |         |                                   |                                                                                 |   |   |   |
|----------------------------------|---------|-----------------------------------|---------------------------------------------------------------------------------|---|---|---|
| Geptidacin                       | Phase 2 | GlaxoSmithKline PLC               | cUTI, CAP, uncomplicated urogenital gonorrhoea                                  | ✓ | - | - |
| Nemonoxacin                      | Phase 2 | TaiGen Biotechnology Co. Ltd.     | CAP, acute skin infection, diabetic foot                                        | ✓ | - | - |
| Ramoplanin                       | Phase 2 | Nanotherapeutics Inc.             | Prevent recurrent <i>Clostridium difficile</i> infection                        | ✓ | - | - |
| Ridinilazole                     | Phase 2 | Summet Therapeutics Inc.          | <i>Clostridium difficile</i>                                                    | ✓ | - | - |
| Zabofloxacin                     | Phase 3 | Dong Wha Pharmaceuticals Co. Ltd. | CAP                                                                             | ✓ | - | - |
| S – 649266                       | Phase 3 | Shionogi Inc.                     | HAP, VAP, cUTI, bloodstream infection                                           | ✓ | - | - |
| Omadacycline                     | Phase 3 | Paratek Pharmaceuticals Inc.      | CAP, cUTI, acute skin infection                                                 | ✓ | - | - |
| Lefamulin                        | Phase 3 | Nabriva Therapeutics AC           | CAP, HAP, VAP, acute skin infection, osteomyelitis, prosthetic joint infections | ✓ | - | - |
| Imipenem / Cilastatin+Relebactam | Phase 3 | Merck & Co. Inc.                  | cUTI, cIAI, HAP, VAP, acute pyelonephritis                                      | ✓ | ✓ | - |
| Iclaprim                         | Phase 3 | Motif Bio PLC                     | HAP, acute skin infection                                                       | ✓ | - | - |
| Cadazolid                        | Phase 3 | Actelion Pharmaceuticals Ltd.     | <i>Clostridium difficile</i>                                                    | ✓ | ✓ | - |
| Taksta (fusidic acid)            | Phase 3 | Cempra Inc.                       | Acute skin infection, prosthetic joint infection                                | ✓ | - | - |

|                                       |         |                                |                                                                                                 |   |                   |   |
|---------------------------------------|---------|--------------------------------|-------------------------------------------------------------------------------------------------|---|-------------------|---|
| Carbavance<br>(Meropenem+Vaborbactam) | Phase 3 | Rempex<br>Pharmaceuticals Inc. | cUTI, cIAI, HAP, VAP, febrile<br>neutropenia, bacteraemia,<br>acute pyelonephritis <sup>a</sup> | ✓ | ✓                 | 1 |
| Delafloxacin (Baxdela)                | Phase 3 | Melinta Therapeutics<br>Inc.   | Acute skin infections, CAP,<br>cUTI                                                             | ✓ | Waiver<br>granted | - |
| Eravacycline                          | Phase 3 | Tetraphase Pharma<br>Inc.      | cIAI and cUTI                                                                                   | ✓ | ✓                 | - |
| Plazomicin                            | Phase 3 | Achaogen Inc.                  | cUTI, HAP, VAP, cIAI,<br>catheter-associated<br>bloodstream infection <sup>a</sup>              | ✓ | -                 | - |
| Solithromycin                         | Phase 3 | Cempra Inc.                    | CAP, uncomplicated<br>urogenital gonorrhoea,<br>urethritis                                      | ✓ | ✓                 | 2 |

HAP, hospital-acquired pneumonia; VAP, ventilator-acquired pneumonia; cUTI, complicated Urinary Tract Infection; CAP, Community-acquired pneumonia; cIAI, complicated Intra-abdominal Infection.

<sup>a</sup> target carbapenem resistant enterobacteriaceae

## DISCUSSION

Our search identified 76 clinical trials investigating one or more antibiotics recruiting children between 0 and 18 years of age. This is low in comparison to the number of on-going trials in adults, despite children representing around a quarter of the global population.[14, 15] A review of completed CTs in the U.S. between 2000 and 2010 identified a total of 4078 adult trials compared to just 294 that had recruited children.[16] In our study, the lack of trials recruiting neonates is striking. Just 23 of the 76 trials identified were recruiting neonates, and remarkably just 8 CTs globally were recruiting preterm neonates. There are broadly two types of pediatric trials conducted globally. Either pharmaceutical-led Phase 1/2 PK and safety trials (n=17) being conducted in the HIC setting, or investigator led, often pragmatic, late phase efficacy trials in the LMIC setting (n=34), with a greater proportion of on-going trials being sponsored by non-profit organisations over industry (66% compared to 34%).. As of April 2016, there were 17 antibiotic PIPs agreed by the EMA,[8] covering a range of indications, most commonly cSSTI, complicated IAI (cIAI), and complicated UTI (cUTI).[13] In contrast, treatments for respiratory and systemic infections, the most common clinical indications for antibiotics in pediatrics, are not currently being evaluated.[14] Thirty-seven antibiotics are currently being developed in adults, yet to our knowledge just 2 of these are being studied in children. Some classes of antibiotics that may be of higher risk for children (tetracyclines and fluoroquinolones) may not be pursued as aggressively for pediatric approvals due to well-recognized issues of toxicity, particularly when safer alternatives are widely available. Given that Gram-negative sepsis is a growing problem in neonates, with a significant increase in the proportion of multi-resistant Gram-negative pathogens,[15] the substantial lag time between the submission date (for PIP or waiver) and declared completion date of PK studies in adults is a real concern; although, there is value in generating substantial safety data in adults prior to exposing children and newborns to potentially toxic new agents.

In 2013, a similar review of European pediatric clinical trials identified 31 trials of antibiotics approved for adults by the EMA in 2000 that were recruiting children in Europe (compared to the 22 trials we found recruiting in Europe). They included both published and ongoing trials, which likely accounts for the higher number of trials reported. They similarly found a very small proportion of neonatal trials (2 of 31), as well as a greater proportion of efficacy-based trials.[9] A review of interventional trials registered with *ClinicalTrials.gov* between 2007 and 2010 found that only 17% had recruited children below 18 years of age.[17] A similar review of antimicrobial CTs conducted in the U.S. between 2000 and 2012 reported that just 5% had recruited only children compared to 74% that recruited only adults, and that, as we have found, the trials were sponsored primarily by non-profit organisations (60% versus 30% by industry).[14] In our search of global trials, 39% of registered CTs reported collection of PK data in comparison to a 2009 paediatric PK research review that reported 24% of registered CTs would be collecting PK data.[18]

1  
2  
3  
4 The search strategy used has some limitations. Since the search was limited to clinical trials  
5 registered with *ClinicalTrials.gov*, it is possible other open or on-going trials registered with  
6 alternative platforms (for example, the WHO International Clinical Trials Registry Platform [ICTRP])  
7 will have been missed. Together with *ClinicalTrials.gov* these could help to establish the entirety of  
8 current clinical research in this field. We did however search EudraCT, and found no further studies  
9 beyond those captured on *ClinicalTrials.gov*. Our search was also limited to open CTs, thereby  
10 missing active but not yet recruiting trials, and those that had already closed to recruitment. The  
11 information recorded for each trial registered with *ClinicalTrials.gov* is updated by the trial  
12 investigators, and therefore relies on them to periodically update the registry. Occasionally,  
13 information such as recruitment status might not be updated in real time.  
14  
15  
16  
17  
18  
19

20  
21 Concerns around the growing threat of antimicrobial resistance have prompted several new  
22 initiatives. In 2016, the EMA published a draft Concept Paper to propose the development of an  
23 Addendum to the guideline on the evaluation of new anti-bacterial products for treatment of bacterial  
24 infections in children.[19] At the same time, the Clinical Trials Transformation Initiative (CTTI) is  
25 currently focused on the identification of key barriers in the conduct of pediatric antibacterial CTs,  
26 which hamper their successful implementation into clinical practice.[20] Recent evidence states that  
27 overall, antibiotic CTs make up less than 1% of all registered pediatric CTs, and that trial completion  
28 is slow, with an average time to completion of around two years.[21] There are specific areas where  
29 the design and conduct of pediatric antibiotic CTs can be harmonized and simplified, such as the  
30 standardisation of the inclusion and exclusion criteria for specific Clinical Infection Syndromes, and  
31 improved bridging of safety and efficacy data from other age groups; these advances could improve  
32 trial conduct and efficiency in children.[22]  
33  
34  
35  
36  
37  
38  
39  
40  
41  
42

## 43 **CONCLUSIONS**

44 This review highlights that very few pediatric antibiotic CTs are being conducted globally,  
45 particularly in neonates. There is a marked disparity between antibiotic drug development  
46 programmes in adults and children. Many issues contribute to the difficulties in conducting pediatric  
47 antibiotic clinical trials. The lack of regulatory guidance, vulnerability of this population, issues with  
48 informed consent and assent, and lack of research-experienced hospital personnel all present  
49 challenges in study design, delivery and recruitment. Delays in the initial start-up of CTs in  
50 pediatrics due to pediatric-specific protocol issues and complicated ethical approval continue to  
51 discourage both academic and pharmaceutical interest. The limited data presented here suggest  
52 that the dismal state of pediatric antibiotic research continues. Earlier collaboration between global  
53 academic research networks and pharmaceutical companies is now vital to accelerate progress.  
54  
55  
56  
57  
58  
59  
60

## ACKNOWLEDGEMENTS

**Contributors** MS, CIB, GT, LF and JAB designed the study. Searches were conducted by GT. Eligible records were identified via manual filtering by GT CIB, LF and MS. IL and JSB commented on study design and assisted with drafting the manuscript.

**Funding** This research received no specific grant from any funding agency in the public, commercial or not-for-profit sectors. CIB was funded as a Clinical Research Fellow by the Global Research in Paediatrics (GRiP) Network of Excellence, part of the European Union's Seventh Framework Programme for research, technological development and demonstration (FP7/2007–2013, grant agreement number 261060).

**Conflict of interest** None declared.

**Data sharing statement** Full dataset is available on request.

## REFERENCES

1. Corny J, Lebel D, Bailey B et al. Unlicensed and Off-Label Drug Use in Children Before and After Pediatric Governmental Initiatives. *J Pediatr Pharmacol Ther.* 2015;20(4):316–28.
2. European Medicines Agency. Concept paper on extrapolation of efficacy and safety in medicine development.  
[http://www.ema.europa.eu/docs/en\\_GB/document\\_library/Scientific\\_guideline/2013/04/WC500142358.pdf](http://www.ema.europa.eu/docs/en_GB/document_library/Scientific_guideline/2013/04/WC500142358.pdf). (accessed May 2016)
3. Dunne J, Rodriguez WJ, Murphy MD et al. Extrapolation of Adult Data and Other Data in Pediatric Drug-Development Programs. *Pediatrics.* 2011;  
<http://pediatrics.aappublications.org/content/early/2011/10/20/peds.2010-3487.abstract> (accessed June 2016)
4. Kearns GL, Abdel-Rahman SM, Alander SW et al. Developmental pharmacology--drug disposition, action, and therapy in infants and children. *N Engl J Med.* 2003;349(12):1157–67.
5. Theuretzbacher U, Van Bambeke F, Cantón R et al. Reviving old antibiotics. *Internet J Antimicrob Chemother.* 2015;  
<http://jac.oxfordjournals.org/content/early/2015/06/10/jac.dkv157.abstract> (accessed June 2016)
6. van der Meer JW, Gyssens IC. Quality of antimicrobial drug prescription in hospital. *Clin Microbiol Infect.* 2001;7:12–5.
7. European Medicines Agency. EMA Opinions and decisions on Paediatric Investigation Plans. 2016;  
[http://www.ema.europa.eu/ema/index.jsp?curl=pages/medicines/landing/pip\\_search.jsp&mid=WC0b01ac058001d129](http://www.ema.europa.eu/ema/index.jsp?curl=pages/medicines/landing/pip_search.jsp&mid=WC0b01ac058001d129). (accessed June 2016)



- 1  
2  
3 8. Guidance for industry. Pediatric Study Plans: Content of and Process for Submitting Initial  
4 Pediatric Study Plans and Amended Initial Pediatric Study Plans.  
5  
6 [http://www.fda.gov/downloads/drugs/guidancecomplianceregulatoryinformation/guidances/uc](http://www.fda.gov/downloads/drugs/guidancecomplianceregulatoryinformation/guidances/ucm360507.pdf)  
7 [m360507.pdf](http://www.fda.gov/downloads/drugs/guidancecomplianceregulatoryinformation/guidances/ucm360507.pdf). (accessed June 2016)  
8
- 9 9. Garazzino S, Lutsar I, Bertaina C et al. New antibiotics for paediatric use: a review of a  
10 decade of regulatory trials submitted to the European Medicines Agency from 2000--why  
11 aren't we doing better? *Int J Antimicrob Agents*. 2013;42(2):99–118.  
12
- 13 10. The World Bank. The World Bank list of economies. 2015;  
14  
15 <http://siteresources.worldbank.org/DATASTATISTICS/Resources/CLASS.XLS> (accessed  
16 October 2016)  
17
- 18 11. The World Health Organisation. WHO ATC/DDD Index. 2016;  
19  
20 [http://www.whocc.no/atc\\_ddd\\_index/](http://www.whocc.no/atc_ddd_index/). (accessed March 2016)  
21
- 22 12. The Pew Charitable Trusts. Antibiotics Currently in Clinical Development. 2016;  
23  
24 [http://www.pewtrusts.org/~media/assets/2016/05/antibiotics-currently-in-clinical-](http://www.pewtrusts.org/~media/assets/2016/05/antibiotics-currently-in-clinical-development.pdf?la=en)  
25 [development.pdf?la=en](http://www.pewtrusts.org/~media/assets/2016/05/antibiotics-currently-in-clinical-development.pdf?la=en). (accessed May 2016)  
26
- 27 13. Lutsar I. Often neglected: paediatric drug development - a regulatory and clinical view. In  
28 Amsterdam, Netherlands; 2016. (S219 - Symposium lecture.).  
29
- 30 14. Stockmann C, Sherwin CMT, Ampofo K et al. Characteristics of antimicrobial studies  
31 registered in the USA through ClinicalTrials.gov. *Int J Antimicrob Agents*. 2013;42(2):161–6.  
32
- 33 15. Versporten A, Bielicki J, Drapier N et al. The Worldwide Antibiotic Resistance and Prescribing  
34 in European Children (ARPEC) point prevalence survey: developing hospital-quality  
35 indicators of antibiotic prescribing for children. *J Antimicrob Chemother*. 2016;71(4):1106–17.  
36
- 37 16. Bielicki JA, Lundin R, Sharland M. Antibiotic Resistance Prevalence in Routine Bloodstream  
38 Isolates from Children's Hospitals Varies Substantially from Adult Surveillance Data in  
39 Europe. *Pediatr Infect Dis J*. 2015;34(7):734–41.  
40
- 41 17. Califf RM, Zarin DA, Kramer JM et al. Characteristics of clinical trials registered in  
42 ClinicalTrials.gov, 2007-2010. *JAMA*. 2012;307(17):1838–47.  
43
- 44 18. Viergever RF, Rademaker CMA, Ghersi D. Pharmacokinetic research in children: an analysis  
45 of registered records of clinical trials. *BMJ Open*. 2011;1(1):e000221.  
46
- 47 19. European Medicines Agency. Concept paper on an addendum to the guideline on the  
48 evaluation of medicinal products indicated for treatment of bacterial infections to address  
49 paediatric-specific clinical data requirements.  
50  
51 [http://www.ema.europa.eu/docs/en\\_GB/document\\_library/Scientific\\_guideline/2016/04/WC50](http://www.ema.europa.eu/docs/en_GB/document_library/Scientific_guideline/2016/04/WC500205026.pdf)  
52 [0205026.pdf](http://www.ema.europa.eu/docs/en_GB/document_library/Scientific_guideline/2016/04/WC500205026.pdf). (accessed July 2016)  
53  
54
- 55 20. Clinical Trials Transformation Initiative. [https://www.ctti-clinicaltrials.org/projects/pediatric-](https://www.ctti-clinicaltrials.org/projects/pediatric-trials)  
56 [trials](https://www.ctti-clinicaltrials.org/projects/pediatric-trials). (accessed July 2016)  
57  
58  
59  
60

- 1
- 2
- 3 21. Clinical Trials Transformation Initiative. AACT database. [https://www.ctti-](https://www.ctti-clinicaltrials.org/aact-database)
- 4 [clinicaltrials.org/aact-database](https://www.ctti-clinicaltrials.org/aact-database). (accessed January 2017)
- 5
- 6 22. Folgari L, Bielicki J, Ruiz B, et al. Harmonisation in study design and outcomes in paediatric
- 7 antibiotic clinical trials: a systematic review. *Lancet Infect Dis*. 2016;16(9):e178-89.
- 8
- 9
- 10
- 11
- 12
- 13
- 14
- 15
- 16
- 17
- 18
- 19
- 20
- 21
- 22
- 23
- 24
- 25
- 26
- 27
- 28
- 29
- 30
- 31
- 32
- 33
- 34
- 35
- 36
- 37
- 38
- 39
- 40
- 41
- 42
- 43
- 44
- 45
- 46
- 47
- 48
- 49
- 50
- 51
- 52
- 53
- 54
- 55
- 56
- 57
- 58
- 59
- 60

For peer review only

1  
2  
3 **LIST OF FIGURES**  
4

5  
6 **Figure 1.** Flow chart. Clinical trial selection process.  
7

8  
9 **Table 1.** Characteristics of clinical trials.  
10

11 **Table 2.** Clinical trial endpoint classification of identified clinical trials stratified by trial sponsor.  
12 Endpoint classification determined by planned primary outcomes.  
13

14  
15 **Table 3.** Clinical indication of identified clinical trials stratified by age group being recruited.  
16

17  
18 **Table 4.** Comparison of antibiotic development pipeline in adults and children. Adapted from Pew  
19 Charitable Trusts "Antibiotics currently in clinical development" pipeline (last accessed October  
20 2016).[12]  
21  
22  
23  
24  
25  
26  
27  
28  
29  
30  
31  
32  
33  
34  
35  
36  
37  
38  
39  
40  
41  
42  
43  
44  
45  
46  
47  
48  
49  
50  
51  
52  
53  
54  
55  
56  
57  
58  
59  
60



Figure 1. Flow Chart. Clinical trial selection process.

254x190mm (300 x 300 DPI)

ew only

## DATASET

|    | A                 | B                                                                                                            | C                  | D                    |
|----|-------------------|--------------------------------------------------------------------------------------------------------------|--------------------|----------------------|
| 1  | <b>NCT Number</b> | <b>Title</b>                                                                                                 | <b>Recruitment</b> | <b>Study Results</b> |
| 2  | NCT02539407       | Population Pharmacokinetics of Anti-infectives in Critically Ill Children                                    | Recruiting         | No Results Available |
| 3  | NCT02935374       | Effect of Antimicrobial Treatment of Acute Otitis Media on the Intestinal Microbiome in Children             | Not yet recruiting | No Results Available |
| 4  | NCT02899143       | Short-course Antimicrobial Therapy in Sepsis                                                                 | Recruiting         | No Results Available |
| 5  | NCT01595529       | The SCOUT Study: Short Course Therapy for Urinary Tract Infections in Children                               | Recruiting         | No Results Available |
| 6  | NCT02380352       | Short-course Antimicrobial Therapy for Paediatric Respiratory Infections                                     | Not yet recruiting | No Results Available |
| 7  | NCT02891915       | Trial to Evaluate Beta-Lactam Antimicrobial Therapy of Community Acquired Pneumonia in Children              | Recruiting         | No Results Available |
| 8  | NCT02746276       | Optimising Antibiotic Treatment for Sick Malnourished Children                                               | Recruiting         | No Results Available |
| 9  | NCT02917551       | BALANCE on the Wards: A Pilot RCT                                                                            | Not yet recruiting | No Results Available |
| 10 | NCT01243437       | A Clinical Trial to Evaluate the Safety and Efficacy of Ciprofloxacin in the Treatment of Plague in Children | Recruiting         | No Results Available |
| 11 | NCT02635191       | Tailored Therapy for Helicobacter Pylori in Children                                                         | Recruiting         | No Results Available |
| 12 | NCT01522105       | Daptomycin in Pediatric Patients With Bacterial Meningitis                                                   | Recruiting         | No Results Available |
| 13 | NCT02456974       | Antibiotic Dosing in Pediatric Intensive Care                                                                | Recruiting         | No Results Available |
| 14 | NCT00579956       | A Randomized Double Blinded Comparison of Ceftazidime and Meropenem in Severe Melioidosis                    | Recruiting         | No Results Available |
| 15 | NCT00545961       | Middle Meatal Bacteriology During Acute Respiratory Infection in Children                                    | Not yet recruiting | No Results Available |
| 16 | NCT01431326       | Pharmacokinetics of Understudied Drugs Administered to Children Per Standard of Care                         | Recruiting         | No Results Available |
| 17 | NCT02475876       | PK of Clindamycin and Trimethoprim-sulfamethoxazole in Infants and Children                                  | Recruiting         | No Results Available |
| 18 | NCT01420341       | Co-trimoxazole as Maintenance Therapy for Melioidosis                                                        | Recruiting         | No Results Available |
| 19 | NCT02266706       | Pharmacokinetic and Safety Study of Ceftolozane/Tazobactam in Pediatric Participants Receiving               | Recruiting         | No Results Available |
| 20 | NCT00867789       | Antibiotics Versus Placebo in the Treatment of Abscesses in the Emergency Department                         | Recruiting         | No Results Available |
| 21 | NCT02879981       | A Safety Study of Balsamic Bactrim in Pediatric Participants With Acute Bronchitis                           | Not yet recruiting | No Results Available |
| 22 | NCT01269541       | MESS-study MRSA Eradication Study Sk'ne                                                                      | Recruiting         | No Results Available |
| 23 | NCT02276482       | Study of Tedizolid Phosphate in Adolescents With Complicated Skin and Soft Tissue Infection (cS              | Recruiting         | No Results Available |
| 24 | NCT02663596       | Safety and TDM of Continuous Infusion Vancomycin Through Continuous Renal Replacement Th                     | Not yet recruiting | No Results Available |
| 25 | NCT02555059       | Special Drug Use Investigation of Ciproxan Injection in Pediatrics                                           | Recruiting         | No Results Available |
| 26 | NCT02297815       | Comparative Effectiveness of Antibiotics for Respiratory Infections                                          | Recruiting         | No Results Available |
| 27 | NCT02224040       | Typhoid Fever: Combined vs. Single Antibiotic Therapy                                                        | Recruiting         | No Results Available |
| 28 | NCT02775968       | Population Pharmacokinetics of Cephalosporins and Macrolides in Chinese Children With Comm                   | Not yet recruiting | No Results Available |
| 29 | NCT02687906       | Dose-finding, Pharmacokinetics, Safety, and Tolerability of Meropenem-Vaborbactam in Pediatr                 | Recruiting         | No Results Available |
| 30 | NCT02783859       | Hospitalised Pneumonia With Extended Treatment (HOPE) Study                                                  | Recruiting         | No Results Available |
| 31 | NCT01994993       | Antibiotic Safety (SCAMP)                                                                                    | Recruiting         | No Results Available |

|    | A           | B                                                                                                 | C                  | D                    |
|----|-------------|---------------------------------------------------------------------------------------------------|--------------------|----------------------|
| 32 | NCT02258763 | Trial on the Ideal Duration of Oral Antibiotics in Children With Pneumonia                        | Recruiting         | No Results Available |
| 33 | NCT02688790 | Study Evaluate the PK Profile of Dalbavancin in Hospitalized Infants and Neonates Patients With   | Recruiting         | No Results Available |
| 34 | NCT00323219 | Oral Moxifloxacin Versus Cefazolin and Oral Probenecid in the Management of Skin and Soft Tis     | Recruiting         | No Results Available |
| 35 | NCT02750761 | A Study of Oral and Intravenous (IV) Tedizolid Phosphate in Hospitalized Participants, Ages 2 to  | Recruiting         | No Results Available |
| 36 | NCT02466438 | Safety and Pharmacokinetics of Piperacillin-tazobactam Extended Infusion in Infants and Childre   | Recruiting         | No Results Available |
| 37 | NCT02260102 | Temocillin Pharmacokinetics in Paediatrics                                                        | Not yet recruiting | No Results Available |
| 38 | NCT02694458 | Comparison of Two Dosage Adjustment Strategies of Vancomycin in Children                          | Recruiting         | No Results Available |
| 39 | NCT01540838 | Slow Initial beta-lactam Infusion With High-dose Paracetamol to Improve the Outcomes of Child     | Recruiting         | No Results Available |
| 40 | NCT00368498 | A Trial to Evaluate the Loading Dose Required to Achieve Therapeutic Serum Teicoplanin Concer     | Recruiting         | No Results Available |
| 41 | NCT01785641 | Single Versus Combined Antibiotic Therapy for Bacterial Peritonitis in CAPD Patients              | Recruiting         | No Results Available |
| 42 | NCT02554383 | Efficacy of Antibiotics in Children With Acute Sinusitis: Which Subgroups Benefit?                | Recruiting         | No Results Available |
| 43 | NCT01265173 | Comparison of Efficacy of Cefotaxime, Ceftriaxone, and Ciprofloxacin for the Treatment of Spon    | Recruiting         | No Results Available |
| 44 | NCT02335905 | Ceftaroline for Treatment of Hematogenously Acquired Staphylococcus Aureus Osteomyelitis in       | Recruiting         | No Results Available |
| 45 | NCT02922686 | Penicillin for the Emergency Department Outpatient Treatment of CELLulitis                        | Not yet recruiting | No Results Available |
| 46 | NCT02848820 | Initial Non-operative Treatment Strategy Versus Appendectomy Treatment Strategy for Simple A      | Not yet recruiting | No Results Available |
| 47 | NCT02475733 | Evaluation of Safety, Pharmacokinetics and Efficacy of CAZ-AVI With Metronidazole in Children A   | Recruiting         | No Results Available |
| 48 | NCT02372461 | Randomized Trial of Amoxicillin Versus Placebo for (Fast Breathing) Pneumonia                     | Recruiting         | No Results Available |
| 49 | NCT01553006 | Study of Cefditoren Pivoxil in Treatment of Childhood With Acute Rhinosinusitis                   | Recruiting         | No Results Available |
| 50 | NCT02527681 | Pharmacokinetics and Safety of Ceftobiprole in Neonates and Infants up to 3 Months Treated W      | Recruiting         | No Results Available |
| 51 | NCT02210169 | RCT of Continuous Versus Intermittent Infusion of Vancomycin in Neonates                          | Recruiting         | No Results Available |
| 52 | NCT02497781 | Evaluation of Safety, Pharmacokinetics and Efficacy of Ceftazidime and Avibactam (CAZ-AVI ) Co    | Recruiting         | No Results Available |
| 53 | NCT02814916 | Dalbavancin for the Treatment of Acute Bacterial Skin and Skin Structure Infections in Children,  | Not yet recruiting | No Results Available |
| 54 | NCT02210325 | Efficacy and Safety Study of Oral Solithromycin Compared to Intramuscular Ceftriaxone Plus Ora    | Recruiting         | No Results Available |
| 55 | NCT02801370 | Phase 3 Study of OTO-201 in Acute Otitis Externa                                                  | Recruiting         | No Results Available |
| 56 | NCT02760420 | 3 Days Amoxicillin Versus Placebo for Fast Breathing Childhood Pneumonia in Malawi                | Recruiting         | No Results Available |
| 57 | NCT02678195 | 3 Days Versus 5 Days Amoxicillin for Chest-indrawing Childhood Pneumonia in Malawi                | Recruiting         | No Results Available |
| 58 | NCT02605122 | Safety and Efficacy of Solithromycin in Adolescents and Children With Community-acquired Bact     | Recruiting         | No Results Available |
| 59 | NCT02570490 | Oral Sodium Fusidate (CEM-102) Versus Oral Linezolid for the Treatment of Acute Bacterial Skin    | Recruiting         | No Results Available |
| 60 | NCT02443285 | Is Spontaneous Bacterial Peritonitis Still Responding to 3rd Generation Cephalosporins?           | Recruiting         | No Results Available |
| 61 | NCT02334124 | Comparing the Intravenous Treatment of Skin Infections in Children, Home Versus Hospital          | Recruiting         | No Results Available |
| 62 | NCT02218372 | A Study to Investigate the Safety and Efficacy of Fidaxomicin (Oral Suspension or Tablets) and Va | Recruiting         | No Results Available |

1  
2  
3  
4  
5  
6  
7  
8  
9  
10  
11  
12  
13  
14  
15  
16  
17  
18  
19  
20  
21  
22  
23  
24  
25  
26  
27  
28  
29  
30  
31  
32  
33  
34  
35  
36  
37  
38  
39  
40  
41  
42  
43  
44  
45  
46  
47

|    | A           | B                                                                                                | C                  | D                    |
|----|-------------|--------------------------------------------------------------------------------------------------|--------------------|----------------------|
| 63 | NCT01032499 | Open and Comparative Study to Measure Tolerability and Efficacy of Taro Elixir                   | Not yet recruiting | No Results Available |
| 64 | NCT02598362 | Pharmacokinetics of Ciprofloxacin in Pediatric Patients                                          | Recruiting         | No Results Available |
| 65 | NCT02878031 | Community Case Management of Chest Indrawing Pneumonia                                           | Recruiting         | No Results Available |
| 66 | NCT02790996 | Neonatal Vancomycin Trial                                                                        | Not yet recruiting | No Results Available |
| 67 | NCT02712307 | Study of 5 and 10 Days Treatment With Penicillin Against Sore Throat Caused by Streptococci      | Recruiting         | No Results Available |
| 68 | NCT02424734 | Safety, Tolerability and Efficacy of Ceftaroline in Paediatrics With Late-Onset Sepsis           | Recruiting         | No Results Available |
| 69 | NCT02134301 | Open-Label, Dose-Finding, Pharmacokinetics, Safety and Tolerability Study of Oritavancin in Ped  | Recruiting         | No Results Available |
| 70 | NCT02013141 | An Open-Label Study of the Pharmacokinetics of a Single Dose of Telavancin in Pediatric Subject  | Recruiting         | No Results Available |
| 71 | NCT01427842 | Dose Enhancement of Vancomycin IN Everyday Patients                                              | Recruiting         | No Results Available |
| 72 | NCT01278017 | The Role of Short-course Ceftriaxone Therapy in the Treatment of Severe Nontyphoidal Salmon      | Recruiting         | No Results Available |
| 73 | NCT00988026 | Safety and Efficacy Comparison of Minocycline Microgranules Versus Lymecycline in the Treatm     | Recruiting         | No Results Available |
| 74 | NCT02288234 | Telavancin Observational Use Registry (TOUR)                                                     | Recruiting         | No Results Available |
| 75 | NCT01304459 | Vancomycin Serum Concentrations in Pediatric Oncology Patients Under Intensive Care              | Recruiting         | No Results Available |
| 76 | NCT01173575 | Assessment of the Efficacy of FOSFOMYCIN in Patients With Bacterial Infection                    | Recruiting         | No Results Available |
| 77 | NCT01778634 | Trial of Intravenous Azithromycin to Eradicate Ureaplasma Respiratory Tract Infection in Preterr | Recruiting         | No Results Available |



|    | E                                                                     | F                         |
|----|-----------------------------------------------------------------------|---------------------------|
| 1  |                                                                       |                           |
| 2  |                                                                       |                           |
| 3  | <b>1 Indication</b>                                                   | <b>Infection category</b> |
| 4  | 2 Proven or suspected infection (in patients on PICU)                 | 9                         |
| 5  | 3 Acute Otitis Media                                                  | 3                         |
| 6  | 4 Sepsis                                                              | 8                         |
| 7  | 5 Urinary Tract Infections (UTI)                                      | 7                         |
| 8  | 6 Community-acquired Pneumonia (CAP)                                  | 4                         |
| 9  | 7 Pneumonia                                                           | 4                         |
| 10 | 8 Proven or suspected infection in patients with malnutrition         | 9                         |
| 11 | 9 Bacteremia                                                          | 8                         |
| 12 | 10 Plague                                                             | 8                         |
| 13 | 11 Helicobacter Pylori Infection                                      | 7                         |
| 14 | 12 Meningitis                                                         | 1                         |
| 15 | 13 Proven or suspected bacterial infection (Pharmacokinetics)         | 9                         |
| 16 | 14 Melioidosis                                                        | 8                         |
| 17 | 15 Acute Respiratory Infection   Sinusitis                            | 3                         |
| 18 | 16 Various infections (including nosocomial Pneumonia, CAP, Acute Bac | Various                   |
| 19 | 17 Bacterial Infections                                               | 9                         |
| 20 | 18 Melioidosis                                                        | 8                         |
| 21 | 19 Proven or Suspected Gram-negative Bacterial Infection              | 9                         |
| 22 | 20 Abscess                                                            | 1                         |
| 23 | 21 Bronchitis                                                         | 4                         |
| 24 | 22 Throatcarriers of MRSA                                             | 3                         |
| 25 | 23 Acute Skin and Soft Tissue infections (aSSTIs)                     | 2                         |
| 26 | 24 Proven or suspected bacterial infection (in CRRT patients)         | 9                         |
| 27 | 25 Cystitis / Pyelonephritis                                          | 7                         |
| 28 | 26 Acute Upper Respiratory Tract Infections (ARTIs)                   | 3                         |
| 29 | 27 Typhoid Fever                                                      | 8                         |
| 30 | 28 Community Acquired Pneumonia (CAP)                                 | 4                         |
| 31 | 29 Bacterial Infections                                               | 9                         |
| 32 | 30 Pneumonia                                                          | 4                         |
| 33 | 31 Complicated Intra Abdominal Infections (cIAls)                     | 6                         |
| 34 |                                                                       |                           |
| 35 |                                                                       |                           |
| 36 |                                                                       |                           |
| 37 |                                                                       |                           |
| 38 |                                                                       |                           |
| 39 |                                                                       |                           |
| 40 |                                                                       |                           |
| 41 |                                                                       |                           |
| 42 |                                                                       |                           |
| 43 |                                                                       |                           |
| 44 |                                                                       |                           |
| 45 |                                                                       |                           |
| 46 |                                                                       |                           |
| 47 |                                                                       |                           |

|    | E                                                           | F |
|----|-------------------------------------------------------------|---|
| 32 | Pneumonia                                                   | 4 |
| 33 | Bacterial Infections                                        | 9 |
| 34 | Cellulitis                                                  | 2 |
| 35 | Gram-Positive Bacterial Infections                          | 9 |
| 36 | Infection                                                   | 9 |
| 37 | Urinary Tract Infection or suspected Cholangitis            | 7 |
| 38 | Methicillin-resistant Staphylococcal Infections             | 9 |
| 39 | Bacterial Meningitis                                        | 1 |
| 40 | Staphylococcal Infections                                   | 9 |
| 41 | Peritonitis (in CAPD patients)                              | 6 |
| 42 | Acute Sinusitis (Respiratory Tract Infections)              | 3 |
| 43 | SBP in patients with Liver Cirrhosis                        | 6 |
| 44 | Hematogenously Acquired Staphylococcus Aureus Osteomyelitis | 5 |
| 45 | Cellulitis or Wound Infection                               | 8 |
| 46 | Appendicitis                                                | 6 |
| 47 | Complicated Intra-abdominal Infections (cIAls)              | 6 |
| 48 | Pneumonia (fast-breathing)                                  | 4 |
| 49 | Rhinosinusitis                                              | 3 |
| 50 | Bacterial Infections                                        | 9 |
| 51 | Sepsis                                                      | 8 |
| 52 | Complicated Urinary Tract Infections (cUTIs)                | 7 |
| 53 | Methicillin-Resistant Staphylococcus Aureus Skin Infection  | 2 |
| 54 | Uncomplicated Urogenital Gonorrhoea                         | 7 |
| 55 | Acute Otitis Externa                                        | 3 |
| 56 | Pneumonia                                                   | 4 |
| 57 | Pneumonia                                                   | 4 |
| 58 | Community-acquired Bacterial Pneumonia                      | 4 |
| 59 | Acute Bacterial Skin and Skin Structure Infections          | 2 |
| 60 | Primary Bacterial Peritonitis                               | 6 |
| 61 | Cellulitis                                                  | 8 |
| 62 | Clostridium Difficile-associated Diarrhea (CDAD)            | 6 |

|    | E                                                                       | F       |
|----|-------------------------------------------------------------------------|---------|
| 1  |                                                                         |         |
| 2  |                                                                         |         |
| 3  | 63 Acne Vulgaris II or III Degree                                       | 2       |
| 4  | 64 Urinary Tract Infection or Pyelonephritis                            | 7       |
| 5  | 65 Pneumonia                                                            | 4       |
| 6  | 66 Late Onset Neonatal Sepsis                                           | 8       |
| 7  | 67 Tonsillitis                                                          | 3       |
| 8  | 68 Late-onset Sepsis                                                    | 8       |
| 9  | 69 Gram Positive Bacterial Infections                                   | 9       |
| 10 | 70 Gram-Positive Bacterial Infections                                   | 9       |
| 11 | 71 Vancomycin Therapy                                                   | 9       |
| 12 | 72 Diarrhea                                                             | 6       |
| 13 | 73 Mild to Moderate Acne                                                | 2       |
| 14 | 74 Hospital Acquired Bacterial Pneumonia (HAP), Complicated Skin and    | Various |
| 15 | 75 Infection                                                            | 9       |
| 16 | 76 Bacterial Infection                                                  | 9       |
| 17 | 77 Eradicate ureaplasma respiratory tract infection from preterm infant | 4       |
| 18 |                                                                         |         |
| 19 |                                                                         |         |
| 20 |                                                                         |         |
| 21 |                                                                         |         |
| 22 |                                                                         |         |
| 23 |                                                                         |         |
| 24 |                                                                         |         |
| 25 |                                                                         |         |
| 26 |                                                                         |         |
| 27 |                                                                         |         |
| 28 |                                                                         |         |
| 29 |                                                                         |         |
| 30 |                                                                         |         |
| 31 |                                                                         |         |
| 32 |                                                                         |         |
| 33 |                                                                         |         |
| 34 |                                                                         |         |
| 35 |                                                                         |         |
| 36 |                                                                         |         |
| 37 |                                                                         |         |
| 38 |                                                                         |         |
| 39 |                                                                         |         |
| 40 |                                                                         |         |
| 41 |                                                                         |         |
| 42 |                                                                         |         |
| 43 |                                                                         |         |
| 44 |                                                                         |         |
| 45 |                                                                         |         |
| 46 |                                                                         |         |
| 47 |                                                                         |         |

|    | G                                                                                   | H                                  | I             | J                     |
|----|-------------------------------------------------------------------------------------|------------------------------------|---------------|-----------------------|
| 1  |                                                                                     |                                    |               |                       |
| 2  |                                                                                     |                                    |               |                       |
| 3  | <b>1 Interventions</b>                                                              | <b>Antibiotic class (J01 code)</b> | <b>Gender</b> | <b>Age</b>            |
| 4  | 2 Antiinfectives (beta-lactam, aminoglycoside, glycopeptide, fluoroquinolone,       | Various                            | Both          | Up to 18 Years        |
| 5  | 3 Amoxicillin, Amoxicillin-Potassium Clavulanate, Macrolide                         | Various                            | Both          | 6 Months to 7 Years   |
| 6  | 4 Antibiotic                                                                        | J01                                | Both          | Up to 18 years        |
| 7  | 5 Trimethoprim sulfamethoxazole, cefixime, or cephalexin                            | Various                            | Both          | 2 Months to 10 Years  |
| 8  | 6 Amoxicillin                                                                       | J01C                               | Both          | 6 Months to 10 Years  |
| 9  | 7 Amoxicillin, Amoxicillin-clavulanate, Cefdinir                                    | Various                            | Both          | 6 Months to 71 Months |
| 10 | 8 Ceftriaxone, Metronidazole                                                        | J01D                               | Both          | 2 Months to 59 Months |
| 11 | 9 7 days vs 14 days of adequate antibiotic treatment                                | J01                                | Both          | Up to 18 years        |
| 12 | 10 Ciprofloxacin, doxyxcycline                                                      | Various                            | Both          | 8 Years and older     |
| 13 | 11 Tailored vs standard therapy (Amoxicillin, Clarithromycin, Metronidazole, Ra     | Various                            | Both          | 4 Years to 18 Years   |
| 14 | 12 Daptomycin                                                                       | J01X                               | Both          | 3 Months to 16 Years  |
| 15 | 13 Amoxicillin-clavulanate, Piperacilline-tazobactam, Vancomycin                    | Various                            | Both          | Up to 16 Years        |
| 16 | 14 Meropenem, Ceftazidime                                                           | J01D                               | Both          | 15 Years and older    |
| 17 | 15 Amoxicillin clavulanate acid                                                     | J01C                               | Both          | 6 Years to 13 Years   |
| 18 | 16 Various drugs (Ceftazidime, Ciprofloxacin, Clindamycin, Doxycycline, Levoflo     | Various                            | Both          | Up to 18 years        |
| 19 | 17 Clindamycin, Trimethoprim-sulfamethoxazole                                       | Various                            | Both          | 1 Month to 16 Years   |
| 20 | 18 Co-trimoxazole                                                                   | J01E                               | Both          | 15 Years and older    |
| 21 | 19 Ceftolozane/Tazobactam                                                           | J01D                               | Both          | Up to 17 Years        |
| 22 | 20 Trimethoprim-sulfamethoxazole                                                    | J01E                               | Both          | 3 Months to 17 Years  |
| 23 | 21 Guaifenesin, Sulfamethoxazole trimethoprim                                       | J01E                               | Both          | 4 Years to 14 Years   |
| 24 | 22 Systemic Rifampin and Clindamycine/Trimehoprimsulfa, or Topical mupiroci         | Various                            | Both          | 5 Years and older     |
| 25 | 23 Tedizolid Phosphate                                                              | J01X                               | Both          | 12 Years to 18 Years  |
| 26 | 24 Vancomycin                                                                       | J01X                               | Both          | Up to 18 years        |
| 27 | 25 Ciprofloxacin                                                                    | J01F                               | Both          | Up to 14 Years        |
| 28 | 26 Antibiotics (Amoxicillin-clavulanate, azithromycin, cefdinir, cefprozil, cefurox | Various                            | Both          | 6 Months to 18 Years  |
| 29 | 27 Ceftriaxone, Ceftriaxone/azithromycin, Azithromycin, Azithromycin/cefixime       | Various                            | Both          | 2 Years to 80 Years   |
| 30 | 28 Cephalosporins and Macrolides                                                    | Various                            | Both          | 1 Year to 18 Years    |
| 31 | 29 Carbavance                                                                       | J01D                               | Both          | Up to 17 Years        |
| 32 | 30 Amoxicillin-clavulanic Acid                                                      | J01C                               | Both          | 3 Months to 5 Years   |
| 33 | 31 Ampicillin/metronidazole/gentamicin/clindamycin/Piperacillin-tazobactam c        | Various                            | Both          | Up to 120 Days        |

|    | G                                                                       | H       | I    | J                     |
|----|-------------------------------------------------------------------------|---------|------|-----------------------|
| 32 | Amoxicillin-Potassium Clavulanate                                       | J01C    | Both | 3 Months to 59 Months |
| 33 | Dalbavancin                                                             | J01X    | Both | Up to 28 Days         |
| 34 | Cefazolin/Moxifloxacin                                                  | Various | Both | Up to 18 Years        |
| 35 | Tedizolid Phosphate                                                     | J01X    | Both | 2 Years to 11 Years   |
| 36 | Piperacillin-tazobactam                                                 | J01C    | Both | 2 Months to 6 Years   |
| 37 | Temocillin                                                              | J01C    | Both | 6 Months to 3 Years   |
| 38 | Vancomycin                                                              | J01X    | Both | 1 Month to 16 Years   |
| 39 | Beta-lactam                                                             | J01C    | Both | 2 Months to 15 Years  |
| 40 | Teicoplanin                                                             | J01X    | Both | 16 Years and older    |
| 41 | Ceftazidime/ciprofloxacin, Ceftazidime, Cefazolin/gentamicin, Cefazolin | Various | Both | 15 Years and older    |
| 42 | Amoxicillin-clavulanate                                                 | J01C    | Both | 2 Years to 11 Years   |
| 43 | Cefotaxime, Ceftriaxone, Ciprofloxacin                                  | Various | Both | 16 Years and older    |
| 44 | Ceftaroline Fosamil                                                     | J01D    | Both | 1 Year to 17 Years    |
| 45 | Flucloxacillin, Phenoxymethylpenicillin                                 | J01C    | Both | 16 Years and older    |
| 46 | Augmentin/Gentamicin, Appendectomy                                      | J01C    | Both | 7 Years to 17 Years   |
| 47 | Ceftazidime-avibactam, Meropenem, Metronidazole                         | Various | Both | 3 Months to 18 Years  |
| 48 | Amoxicillin                                                             | J01C    | Both | 2 Months to 59 Months |
| 49 | Cefditoren pivoxil                                                      | J01D    | Both | 1 Year to 15 Years    |
| 50 | Ceftobiprole                                                            | J01D    | Both | Up to 3 Months        |
| 51 | Vancomycin                                                              | J01X    | Both | Up to 90 Days         |
| 52 | Ceftazidime-avibactam, Cefepime                                         | J01D    | Both | 3 Months to 18 Years  |
| 53 | Dalbavancin single dose                                                 | J01X    | Both | 3 Months to 17 Years  |
| 54 | Solithromycin, Ceftriaxone, Azithromycin                                | Various | Both | 15 Years and older    |
| 55 | Ciprofloxacin                                                           | J01M    | Both | 6 Months and older    |
| 56 | Amoxicillin                                                             | J01C    | Both | 2 Months to 59 Months |
| 57 | Amoxicillin                                                             | J01C    | Both | 2 Months to 59 Months |
| 58 | Solithromycin                                                           | J01F    | Both | 2 Months to 17 Years  |
| 59 | Sodium fusidate, Linezolid                                              | J01X    | Both | 12 Years and older    |
| 60 | Cefotaxime, Ceftriaxone                                                 | J01D    | Both | Up to 18 Years        |
| 61 | Ceftriaxone, Flucloxacillin                                             | Various | Both | 6 Months to 18 Years  |
| 62 | Fidaxomicin, Vancomycin                                                 | J01X    | Both | Up to 17 Years        |

1  
2  
3  
4  
5  
6  
7  
8  
9  
10  
11  
12  
13  
14  
15  
16  
17  
18  
19  
20  
21  
22  
23  
24  
25  
26  
27  
28  
29  
30  
31  
32  
33  
34  
35  
36  
37  
38  
39  
40  
41  
42  
43  
44  
45  
46  
47

|    | G                        | H    | I    | J                     |
|----|--------------------------|------|------|-----------------------|
| 63 | Taro Elixir              | J01A | Both | 14 Years and older    |
| 64 | Ciprofloxacin            | J01M | Both | 3 Months to 17 Years  |
| 65 | Amoxicillin              | J01C | Both | 2 Months to 59 Months |
| 66 | Vancomycin               | J01X | Both | Up to 90 Days         |
| 67 | Phenoxymethylpenicillin  | J01C | Both | 6 Years and older     |
| 68 | Ceftaroline Fosamil      | J01D | Both | Up to 59 Days         |
| 69 | Oritavancin              | J01X | Both | Up to 18 Years        |
| 70 | Telavancin               | J01X | Both | 1 Year to 17 Years    |
| 71 | Vancomycin               | J01X | Both | 16 Years and older    |
| 72 | Ceftriaxone              | J01D | Both | 3 Months to 18 Years  |
| 73 | Minocycline, Lymecycline | J01A | Both | 14 Years to 30 Years  |
| 74 | Telavancin               | J01X | Both | Up to 18 Years        |
| 75 | Vancomycin               | J01X | Both | Up to 18 Years        |
| 76 | Fosfomycin               | J01X | Both | Up to 18 Years        |
| 77 | Azithromycin             | J01F | Both | 0 to 72 hours         |

|    | K         | L                    | M                                  | N                           | O                 |
|----|-----------|----------------------|------------------------------------|-----------------------------|-------------------|
| 1  | Age group | Estimated enrollment | Location                           | Income class                | Geographic region |
| 2  | 8         | 1850                 | France                             | High income                 | Europe            |
| 3  | 9         | 150                  | Finland                            | High income                 | Europe            |
| 4  | 8         | 320                  | Italy                              | High income                 | Europe            |
| 5  | 9         | 746                  | United States                      | High income                 | North America     |
| 6  | 9         | 270                  | Canada                             | High income                 | North America     |
| 7  | 9         | 400                  | United States                      | High income                 | North America     |
| 8  | 9         | 80                   | Kenya                              | Lower middle income         | Africa            |
| 9  | 8         | 50                   | Canada                             | High income                 | North America     |
| 10 | 11        | 200                  | Uganda                             | Low income                  | Africa            |
| 11 | 11        | 200                  | China                              | Upper middle income         | Asia              |
| 12 | 10        | 5                    | Switzerland                        | High income                 | Europe            |
| 13 | 8         | 200                  | Belgium                            | High income                 | Europe            |
| 14 | 5         | 750                  | Thailand                           | Upper middle income         | Asia              |
| 15 | 11        | 120                  | Finland                            | High income                 | Europe            |
| 16 | 8         | 3000                 | Various (United States, Canada)    | High income                 | International     |
| 17 | 10        | 54                   | United States                      | High income                 | North America     |
| 18 | 5         | 800                  | Thailand                           | Upper middle income         | Asia              |
| 19 | 8         | 36                   | United States                      | High income                 | North America     |
| 20 | 10        | 200                  | United States                      | High income                 | North America     |
| 21 | 11        | 50                   | Peru                               | Upper middle income         | Latin America     |
| 22 | 11        | 69                   | Sweden                             | High income                 | North America     |
| 23 | 5         | 162                  | Various (United States, Argentina) | Upper middle to High income | International     |
| 24 | 8         | 10                   | United States                      | High income                 | North America     |
| 25 | 8         | 45                   | Japan                              | High income                 | Asia              |
| 26 | 10        | 117000               | United States                      | High income                 | North America     |
| 27 | 11        | 120                  | Nepal                              | Low income                  | Asia              |
| 28 | 10        | 750                  | China                              | Upper middle income         | Asia              |
| 29 | 8         | 56                   | United States                      | High income                 | North America     |
| 30 | 9         | 314                  | Various (Australia, Malaysia)      | High income                 | Oceania           |
| 31 | 6         | 284                  | Various (United States, Canada)    | High income                 | North America     |



|    | K  | L    | M                              | N                           | O             |
|----|----|------|--------------------------------|-----------------------------|---------------|
| 32 | 9  | 300  | Malaysia                       | Upper middle income         | Asia          |
| 33 | 2  | 24   | United States                  | High income                 | North America |
| 34 | 8  | 390  | Canada                         | High income                 | North America |
| 35 | 4  | 32   | United States                  | High income                 | North America |
| 36 | 9  | 141  | Canada                         | High income                 | North America |
| 37 | 9  | 45   | Belgium                        | High income                 | Europe        |
| 38 | 10 | 100  | France                         | High income                 | Europe        |
| 39 | 10 | 400  | Angola                         | Upper middle income         | Africa        |
| 40 | 5  | 20   | Taiwan, China                  | High income                 | Asia          |
| 41 | 5  | 300  | Thailand                       | Upper middle income         | Asia          |
| 42 | 4  | 688  | United States                  | High income                 | North America |
| 43 | 5  | 261  | Republic of Korea              | High income                 | Asia          |
| 44 | 10 | 18   | United States                  | High income                 | North America |
| 45 | 5  | 414  | Ireland                        | High income                 | Europe        |
| 46 | 11 | 334  | Netherlands                    | High income                 | Europe        |
| 47 | 10 | 102  | Various (United States, Argent | Upper middle to High income | International |
| 48 | 9  | 2500 | Pakistan                       | Lower middle income         | Asia          |
| 49 | 10 | 120  | Thailand                       | Upper middle income         | Asia          |
| 50 | 6  | 45   | Various (Belgium, Germany, Li  | High income                 | Europe        |
| 51 | 6  | 200  | Australia                      | High income                 | Oceania       |
| 52 | 10 | 102  | Various (United States, Czech  | Upper middle to High income | International |
| 53 | 10 | 300  | United States                  | High income                 | North America |
| 54 | 5  | 300  | Various (United States, Austra | High income                 | International |
| 55 | 10 | 500  | Various (United States, Canad  | High income                 | North America |
| 56 | 9  | 2000 | Malawi                         | Low income                  | Africa        |
| 57 | 9  | 2000 | Malawi                         | Low income                  | Africa        |
| 58 | 10 | 400  | Various (United States, Bulgar | High income                 | International |
| 59 | 5  | 712  | Various (United States, Puertc | High income                 | International |
| 60 | 8  | 100  | Egypt                          | Lower middle income         | Africa        |
| 61 | 10 | 188  | Australia                      | High income                 | Oceania       |
| 62 | 8  | 144  | Various (United States, Belgiu | High income                 | International |

|    | K  | L    | M                                | N                   | O             |
|----|----|------|----------------------------------|---------------------|---------------|
| 63 | 5  | 120  | Brazil                           | Upper middle income | Latin America |
| 64 | 10 | 20   | Belgium                          | High income         | Europe        |
| 65 | 9  | 308  | Nigeria                          | Lower middle income | Africa        |
| 66 | 6  | 300  | Various (United Kingdom, France) | High income         | Europe        |
| 67 | 11 | 432  | Sweden                           | High income         | Europe        |
| 68 | 7  | 24   | Various (United States, Hungary) | High income         | International |
| 69 | 8  | 60   | United States                    | High income         | North America |
| 70 | 10 | 32   | United States                    | High income         | North America |
| 71 | 5  | 100  | Australia                        | High income         | Oceania       |
| 72 | 10 | 200  | Taiwan, China                    | High income         | Asia          |
| 73 | 5  | 168  | Mexico                           | High income         | North America |
| 74 | 8  | 1000 | United States                    | High income         | North America |
| 75 | 8  | 50   | Brazil                           | Upper middle income | Latin America |
| 76 | 8  | 200  | Various (Austria, Germany)       | High income         | Europe        |
| 77 | 1  | 180  | United States                    | High income         | North America |

|    | P  | Q                                                    | R              | S                  | T              |                                |
|----|----|------------------------------------------------------|----------------|--------------------|----------------|--------------------------------|
| 1  |    |                                                      |                |                    |                |                                |
| 2  |    |                                                      |                |                    |                |                                |
| 3  | 1  | <b>Collaborators</b>                                 | <b>Sponsor</b> | <b>Study Types</b> | <b>Phase</b>   | <b>Endpoint classification</b> |
| 4  | 2  | Assistance Publique - Hopitaux de Paris              | Hospital       | Observational      | Not applicable | Pharmacokinetics               |
| 5  | 3  | University of Oulu Oulu University Hospital          | University     | Interventional     | Phase 4        | Efficacy                       |
| 6  | 4  | Ospedale Santa Maria delle Croci                     | Hospital       | Interventional     | Phase 2        | Safety/Efficacy                |
| 7  | 5  | Children's Hospital of Philadelphia Children's Ho    | Hospital       | Interventional     | Phase 2        | Safety/Efficacy                |
| 8  | 6  | Hamilton Health Sciences Corporation Children's      | Hospital       | Interventional     | Phase 4        | Safety/Efficacy                |
| 9  | 7  | National Institute of Allergy and Infectious Disease | NIH            | Interventional     | Phase 4        | Efficacy                       |
| 10 | 8  | University of Oxford KEMRI Wellcome Trust Rese       | University     | Interventional     | Phase 2        | Pharmacokinetics               |
| 11 | 9  | Sunnybrook Health Sciences Centre                    | Hospital       | Interventional     | Not specified  | Efficacy                       |
| 12 | 10 | Centers for Disease Control and Prevention MRC       | CDC            | Interventional     | Phase 2        | Safety/Efficacy                |
| 13 | 11 | Beijing Children's Hospital                          | Hospital       | Interventional     | Phase 4        | Safety/Efficacy                |
| 14 | 12 | University Hospital Inselspital, Berne               | Hospital       | Interventional     | Phase 1        | Pharmacokinetics               |
| 15 | 13 | University Hospital, Ghent University Hospital, A    | Hospital       | Observational      | Not applicable | Pharmacokinetics               |
| 16 | 14 | University of Oxford Mahidol University Wellcor      | University     | Interventional     | Not specified  | Efficacy                       |
| 17 | 15 | Oulu University Hospital                             | University     | Interventional     | Phase 4        | Safety/Efficacy                |
| 18 | 16 | Daniel Benjamin Eunice Kennedy Shriver Nationa       | University     | Observational      | Not applicable | Pharmacokinetics               |
| 19 | 17 | Michael Cohen-Wolkowicz Eunice Kennedy Shriv         | University     | Interventional     | Phase 1        | Pharmacokinetics               |
| 20 | 18 | Khon Kaen University                                 | University     | Interventional     | Not specified  | Efficacy                       |
| 21 | 19 | Cubist Pharmaceuticals LLC                           | Industry       | Interventional     | Phase 1        | Pharmacokinetics               |
| 22 | 20 | Children's Mercy Hospital Kansas City Blue Cross     | Hospital       | Interventional     | Not specified  | Efficacy                       |
| 23 | 21 | Hoffmann-La Roche                                    | Industry       | Observational      | Not applicable | Safety                         |
| 24 | 22 | Region Skane                                         | Hospital       | Interventional     | Not specified  | Efficacy                       |
| 25 | 23 | Cubist Pharmaceuticals LLC                           | Industry       | Interventional     | Phase 3        | Safety                         |
| 26 | 24 | Drexel University The Center for Pediatric Pharm     | University     | Interventional     | Phase 1        | Safety                         |
| 27 | 25 | Bayer                                                | Industry       | Observational      | Not applicable | Safety/Efficacy                |
| 28 | 26 | Children's Hospital of Philadelphia                  | Hospital       | Observational      | Not applicable | Safety/Efficacy                |
| 29 | 27 | Sheba Medical Center                                 | Hospital       | Interventional     | Phase 4        | Efficacy                       |
| 30 | 28 | Beijing Children's Hospital                          | Hospital       | Observational      | Not applicable | Pharmacokinetics               |
| 31 | 29 | Rempex Pharmaceuticals (a wholly owned subsidi       | Industry       | Interventional     | Phase 1        | Safety                         |
| 32 | 30 | Menzies School of Health Research Griffith Univ      | University     | Interventional     | Phase 4        | Safety/Efficacy                |
| 33 | 31 | Michael Cohen-Wolkowicz The EMMES Corpora            | University     | Interventional     | Phase 2-3      | Safety                         |

|    | P                                                                                | Q                   | R              | S             | T                |
|----|----------------------------------------------------------------------------------|---------------------|----------------|---------------|------------------|
| 32 | University of Malaya   Menzies School of Health Research                         | University          | Interventional | Phase 4       | Efficacy         |
| 33 | Durata Therapeutics Inc., an affiliate of Allergan                               | Industry            | Interventional | Phase 1       | Pharmacokinetics |
| 34 | University of British Columbia                                                   | University          | Interventional | Phase 3       | Efficacy         |
| 35 | Merck Sharp & Dohme Corp.                                                        | Industry            | Interventional | Phase 1       | Pharmacokinetics |
| 36 | St. Justine's Hospital                                                           | Hospital            | Interventional | Phase 1       | Pharmacokinetics |
| 37 | Université Catholique de Louvain                                                 | University          | Interventional | Phase 4       | Pharmacokinetics |
| 38 | Assistance Publique - Hôpitaux de Paris                                          | Hospital            | Interventional | Not specified | Pharmacokinetics |
| 39 | Helsinki University   Foundation for Paediatric Research                         | University          | Interventional | Phase 4       | Safety/Efficacy  |
| 40 | National Taiwan University Hospital                                              | University          | Interventional | Phase 4       | Pharmacokinetics |
| 41 | Chulalongkorn University                                                         | University          | Interventional | Not specified | Efficacy         |
| 42 | University of Pittsburgh   National Institute of Allergy and Infectious Diseases | University          | Interventional | Phase 3       | Safety/Efficacy  |
| 43 | Korea University                                                                 | University          | Interventional | Phase 4       | Efficacy         |
| 44 | Baylor College of Medicine   Forest Laboratories                                 | University          | Interventional | Phase 1-2     | Safety/Efficacy  |
| 45 | Royal College of Surgeons, Ireland   Health Research Board                       | University          | Interventional | Phase 4       | Efficacy         |
| 46 | Ramon Gorter   ZonMw: The Netherlands Organisation for Scientific Research       | University          | Interventional | Phase 4       | Efficacy         |
| 47 | AstraZeneca   PRA Health Sciences                                                | Industry            | Interventional | Phase 2       | Safety/Efficacy  |
| 48 | Aga Khan University                                                              | University          | Interventional | Not specified | Efficacy         |
| 49 | Thammasat University                                                             | University          | Interventional | Phase 4       | Safety/Efficacy  |
| 50 | Basilea Pharmaceutica                                                            | Industry            | Interventional | Phase 1       | Pharmacokinetics |
| 51 | Murdoch Childrens Research Institute   Royal Children's Hospital                 | University          | Interventional | Not specified | Pharmacokinetics |
| 52 | AstraZeneca   PRA Health Sciences                                                | Industry            | Interventional | Phase 2       | Safety/Efficacy  |
| 53 | Durata Therapeutics Inc., an affiliate of Allergan                               | Industry            | Interventional | Phase 3       | Safety/Efficacy  |
| 54 | Cempra Inc   National Institute of Allergy and Infectious Diseases               | Industry            | Interventional | Phase 3       | Efficacy         |
| 55 | Otonomy, Inc.                                                                    | Industry            | Interventional | Phase 3       | Efficacy         |
| 56 | Save the Children   University of North Carolina   UNC Children's Hospital       | Health Organisation | Interventional | Phase 4       | Efficacy         |
| 57 | Save the Children   University of North Carolina   UNC Children's Hospital       | Health Organisation | Interventional | Phase 4       | Efficacy         |
| 58 | Cempra Inc                                                                       | Industry            | Interventional | Phase 2-3     | Safety/Efficacy  |
| 59 | Cempra Inc                                                                       | Industry            | Interventional | Phase 3       | Safety/Efficacy  |
| 60 | Tanta University                                                                 | University          | Interventional | Phase 3       | Efficacy         |
| 61 | Murdoch Childrens Research Institute                                             | University          | Interventional | Not specified | Efficacy         |
| 62 | Astellas Pharma Europe B.V.   Merck Sharp & Dohme                                | Industry            | Interventional | Phase 3       | Safety/Efficacy  |

|    | P                                                  | Q               | R              | S              | T                |
|----|----------------------------------------------------|-----------------|----------------|----------------|------------------|
| 63 | Laboratorios Goulart S.A.                          | Industry        | Interventional | Phase 3        | Safety/Efficacy  |
| 64 | University Hospital, Ghent   Universitair Ziekenhu | University      | Interventional | Phase 4        | Pharmacokinetics |
| 65 | Malaria Consortium   World Health Organization     | Health Organisa | Interventional | Phase 4        | Safety           |
| 66 | PENTA Foundation   St George's, University of Lor  | Health Organisa | Interventional | Phase 2        | Safety/Efficacy  |
| 67 | Sigvard Mì   Istad   Public Health Agency of Swede | University      | Interventional | Phase 4        | Safety/Efficacy  |
| 68 | AstraZeneca   PRA Health Sciences                  | Industry        | Interventional | Phase 2-3      | Safety/Efficacy  |
| 69 | The Medicines Company                              | Industry        | Interventional | Phase 1        | Pharmacokinetics |
| 70 | Theravance Biopharma Antibiotics, Inc.             | Industry        | Interventional | Phase 4        | Pharmacokinetics |
| 71 | The Canberra Hospital                              | Hospital        | Interventional | Phase 2        | Pharmacokinetics |
| 72 | Chang Gung Memorial Hospital                       | Hospital        | Interventional | Phase 4        | Efficacy         |
| 73 | Darier                                             | Industry        | Interventional | Phase 4        | Safety/Efficacy  |
| 74 | Theravance Biopharma Antibiotics, Inc.             | Industry        | Observational  | Not applicable | Safety/Efficacy  |
| 75 | Grupo de Apoio ao Adolescente e a Crianca com      | Hospital        | Observational  | Not applicable | Pharmacokinetics |
| 76 | Infectopharm Arzneimittel GmbH   J&P Medical R     | Industry        | Observational  | Not applicable | Efficacy         |
| 77 | University of Maryland                             | University      | Interventional | Phase 2        | Safety/Efficacy  |

|    | U  | V                        | W                 | X                 | Y          | Z          | AA               | AB            |                         |
|----|----|--------------------------|-------------------|-------------------|------------|------------|------------------|---------------|-------------------------|
| 1  | 1  | Primary outcome variable | PK data collected | First Receive     | Start Date | Completion | Last Update      | Last Verified | Results First Received  |
| 2  | 2  | PK                       | PK study design   | July 2, 2015      | Sep-15     | Dec-18     | September 1      | Sep-16        | No Study Results Posted |
| 3  | 3  | Efficacy                 | No PK data        | September 2       | Oct-16     | null       | October 12, 2016 | Oct-16        | No Study Results Posted |
| 4  | 4  | Efficacy                 | No PK data        | September 8       | Sep-16     | null       | September 1      | Sep-16        | No Study Results Posted |
| 5  | 5  | Efficacy                 | No PK data        | May 8, 2012       | May-12     | Apr-18     | June 27, 2016    | Jun-16        | No Study Results Posted |
| 6  | 6  | Efficacy                 | No PK data        | March 2, 2011     | Mar-16     | May-18     | March 24, 2016   | Mar-16        | No Study Results Posted |
| 7  | 7  | Efficacy                 | No PK data        | September 1       | Oct-16     | Mar-19     | October 13, 2016 | Oct-16        | No Study Results Posted |
| 8  | 8  | PK                       | PK study design   | April 4, 2016     | Apr-16     | Sep-16     | April 25, 2016   | Apr-16        | No Study Results Posted |
| 9  | 9  | Efficacy                 | No PK data        | September 2       | Oct-16     | Dec-17     | September 2      | Sep-16        | No Study Results Posted |
| 10 | 10 | Efficacy                 | No PK data        | November 17       | Dec-10     | null       | September 1      | Sep-12        | No Study Results Posted |
| 11 | 11 | Efficacy                 | No PK data        | November 25       | Mar-14     | Jul-16     | December 16      | Nov-15        | No Study Results Posted |
| 12 | 12 | PK                       | Primary PK data   | January 26, 2012  | Apr-12     | Apr-18     | December 10      | Dec-15        | No Study Results Posted |
| 13 | 13 | PK                       | PK study design   | May 18, 2015      | May-12     | null       | November 17      | Nov-15        | No Study Results Posted |
| 14 | 14 | Efficacy                 | No PK data        | December 18       | Dec-07     | Sep-10     | June 3, 2008     | Aug-07        | No Study Results Posted |
| 15 | 15 | Efficacy                 | No PK data        | October 17, 2007  | Nov-07     | Dec-09     | October 18, 2007 | Oct-07        | No Study Results Posted |
| 16 | 16 | PK                       | PK study design   | August 17, 2011   | Nov-11     | Feb-17     | February 4, 2016 | Feb-16        | No Study Results Posted |
| 17 | 17 | PK                       | PK study design   | June 12, 2015     | Nov-15     | Dec-17     | August 1, 2016   | Aug-16        | No Study Results Posted |
| 18 | 18 | Efficacy                 | No PK data        | August 18, 2011   | Aug-11     | Dec-20     | August 30, 2016  | Aug-16        | No Study Results Posted |
| 19 | 19 | PK                       | PK study design   | September 2       | Sep-14     | Nov-16     | October 31, 2016 | Oct-16        | No Study Results Posted |
| 20 | 20 | Efficacy                 | No PK data        | March 23, 2009    | Mar-09     | Oct-12     | June 21, 2011    | Jun-11        | No Study Results Posted |
| 21 | 21 | Safety                   | No PK data        | August 23, 2016   | Aug-16     | Dec-16     | September 1      | Sep-16        | No Study Results Posted |
| 22 | 22 | Efficacy                 | No PK data        | January 3, 2011   | Mar-11     | Jun-15     | May 25, 2015     | May-15        | No Study Results Posted |
| 23 | 23 | Safety                   | Secondary PK data | October 9, 2015   | Mar-15     | Jan-18     | October 31, 2016 | Oct-16        | No Study Results Posted |
| 24 | 24 | Safety                   | Primary PK data   | January 12, 2017  | Jan-17     | Dec-18     | September 8      | Sep-16        | No Study Results Posted |
| 25 | 25 | Safety                   | No PK data        | September 1       | Jul-16     | Sep-18     | October 19, 2016 | Oct-16        | No Study Results Posted |
| 26 | 26 | Efficacy                 | No PK data        | November 17       | Jan-14     | Jul-17     | May 6, 2016      | May-16        | No Study Results Posted |
| 27 | 27 | Efficacy                 | No PK data        | August 21, 2013   | Aug-13     | Aug-15     | August 26, 2013  | Aug-14        | No Study Results Posted |
| 28 | 28 | PK                       | PK study design   | May 11, 2016      | Aug-16     | Oct-22     | May 17, 2016     | May-16        | No Study Results Posted |
| 29 | 29 | Safety                   | Primary PK data   | February 17, 2016 | Jul-16     | Sep-19     | October 6, 2016  | Oct-16        | No Study Results Posted |
| 30 | 30 | Efficacy                 | No PK data        | May 5, 2016       | Jun-16     | Dec-20     | October 7, 2016  | Oct-16        | No Study Results Posted |
| 31 | 31 | Safety                   | No PK data        | November 18       | Dec-13     | Sep-17     | August 1, 2016   | Aug-16        | No Study Results Posted |



|    | U        | V                 | W             | X      | Y      | Z             | AA     | AB                      |
|----|----------|-------------------|---------------|--------|--------|---------------|--------|-------------------------|
| 32 | Efficacy | No PK data        | September 2   | Nov-14 | Dec-18 | December 20   | Dec-15 | No Study Results Posted |
| 33 | PK       | PK study design   | February 18,  | Apr-16 | May-17 | October 19, 2 | Oct-16 | No Study Results Posted |
| 34 | Efficacy | No PK data        | May 8, 2006   | Jan-04 | Dec-13 | February 6, 2 | Feb-12 | No Study Results Posted |
| 35 | PK       | PK study design   | April 1, 2016 | May-16 | Feb-18 | October 21, 2 | Oct-16 | No Study Results Posted |
| 36 | PK       | PK study design   | June 2, 2015  | Jan-16 | Dec-17 | April 18, 201 | Apr-16 | No Study Results Posted |
| 37 | PK       | PK study design   | October 1, 20 | Oct-16 | Oct-17 | October 24, 2 | Oct-16 | No Study Results Posted |
| 38 | PK       | PK study design   | February 24,  | Feb-16 | Feb-17 | March 8, 201  | Mar-16 | No Study Results Posted |
| 39 | Efficacy | No PK data        | February 23,  | Feb-12 | Jul-17 | February 19,  | Feb-16 | No Study Results Posted |
| 40 | PK       | PK study design   | August 23, 20 | Jun-06 | Dec-07 | August 23, 20 | Aug-06 | No Study Results Posted |
| 41 | Efficacy | No PK data        | January 30, 2 | Dec-12 | Dec-13 | February 6, 2 | Feb-13 | No Study Results Posted |
| 42 | Efficacy | No PK data        | September 8   | Feb-16 | Sep-20 | October 3, 20 | Oct-16 | No Study Results Posted |
| 43 | Efficacy | No PK data        | December 22   | Apr-07 | Apr-16 | April 8, 2014 | Apr-14 | No Study Results Posted |
| 44 | Safety   | Secondary PK data | December 31   | Jan-15 | Jan-20 | June 24, 201  | Jun-16 | No Study Results Posted |
| 45 | Efficacy | No PK data        | August 9, 20  | Dec-16 | Dec-19 | September 3   | Jul-16 | No Study Results Posted |
| 46 | Efficacy | No PK data        | July 24, 2016 | Dec-16 | Dec-20 | July 26, 2016 | Jul-16 | No Study Results Posted |
| 47 | Safety   | Secondary PK data | May 25, 2015  | Jul-15 | Oct-17 | October 21, 2 | Oct-16 | No Study Results Posted |
| 48 | Efficacy | No PK data        | November 4,   | Nov-14 | Jul-17 | June 3, 2016  | Jun-16 | No Study Results Posted |
| 49 | Efficacy | No PK data        | February 17,  | Jan-12 | Sep-12 | March 13, 20  | Mar-12 | No Study Results Posted |
| 50 | PK       | PK study design   | August 5, 20  | Aug-14 | Jun-17 | October 20, 2 | Oct-16 | No Study Results Posted |
| 51 | PK       | PK study design   | August 5, 20  | Sep-14 | Sep-17 | March 17, 20  | Mar-16 | No Study Results Posted |
| 52 | Safety   | Secondary PK data | June 16, 201  | Sep-15 | Oct-17 | October 21, 2 | Oct-16 | No Study Results Posted |
| 53 | Efficacy | No PK data        | June 8, 2016  | Jun-16 | Jul-18 | June 23, 201  | Jun-16 | No Study Results Posted |
| 54 | Efficacy | No PK data        | August 1, 20  | Aug-14 | Apr-17 | September 2   | Sep-16 | No Study Results Posted |
| 55 | Efficacy | No PK data        | June 13, 201  | Jun-16 | Nov-16 | June 13, 201  | Jun-16 | No Study Results Posted |
| 56 | Efficacy | No PK data        | May 1, 2016   | Jun-16 | Sep-18 | June 10, 201  | Jun-16 | No Study Results Posted |
| 57 | Efficacy | No PK data        | February 3, 2 | Mar-16 | null   | June 10, 201  | Jun-16 | No Study Results Posted |
| 58 | Safety   | No PK data        | November 10   | Mar-16 | Jan-18 | September 1   | Sep-16 | No Study Results Posted |
| 59 | Efficacy | No PK data        | October 5, 20 | Nov-15 | Feb-17 | October 5, 20 | Oct-16 | No Study Results Posted |
| 60 | Efficacy | No PK data        | May 11, 2015  | Jan-15 | Dec-16 | May 9, 2016   | May-16 | No Study Results Posted |
| 61 | Efficacy | No PK data        | January 4, 20 | Jan-15 | Jan-17 | March 16, 20  | Mar-16 | No Study Results Posted |
| 62 | Efficacy | No PK data        | August 11, 20 | Oct-14 | Feb-17 | June 17, 201  | Jun-16 | No Study Results Posted |



1  
2  
3  
4  
5  
6  
7  
8  
9  
10  
11  
12  
13  
14  
15  
16  
17  
18  
19  
20  
21  
22  
23  
24  
25  
26  
27  
28  
29  
30  
31  
32  
33  
34  
35  
36  
37  
38  
39  
40  
41  
42  
43  
44  
45  
46  
47

|    | U        | V                 | W             | X      | Y      | Z             | AA     | AB                      |
|----|----------|-------------------|---------------|--------|--------|---------------|--------|-------------------------|
| 63 | Efficacy | No PK data        | December 14,  | May-10 | Oct-10 | March 18, 20  | Dec-09 | No Study Results Posted |
| 64 | PK       | PK study design   | November 4,   | Apr-15 | Apr-16 | November 4,   | Nov-15 | No Study Results Posted |
| 65 | Safety   | No PK data        | August 17, 20 | Oct-16 | Jul-17 | October 3, 20 | Oct-16 | No Study Results Posted |
| 66 | Efficacy | Secondary PK data | April 7, 2016 | Jul-16 | Mar-18 | May 31, 2016  | May-16 | No Study Results Posted |
| 67 | Efficacy | No PK data        | March 4, 201  | Sep-15 | Oct-16 | October 4, 20 | Oct-16 | No Study Results Posted |
| 68 | Safety   | Secondary PK data | February 23,  | Aug-15 | Oct-17 | October 14, 2 | Oct-16 | No Study Results Posted |
| 69 | PK       | PK study design   | May 7, 2014   | May-14 | Dec-16 | November 4,   | Nov-15 | No Study Results Posted |
| 70 | PK       | PK study design   | December 11   | Dec-14 | Aug-16 | June 24, 201  | Jun-16 | No Study Results Posted |
| 71 | PK       | PK study design   | August 31, 20 | Aug-11 | Jul-12 | September 1   | Aug-11 | No Study Results Posted |
| 72 | Efficacy | No PK data        | November 25   | Aug-10 | Jul-12 | January 14, 2 | Nov-10 | No Study Results Posted |
| 73 | Efficacy | No PK data        | September 3   | Jun-09 | Apr-10 | September 3   | Sep-09 | No Study Results Posted |
| 74 | Efficacy | No PK data        | November 5,   | Nov-14 | Sep-18 | June 29, 201  | Jun-16 | No Study Results Posted |
| 75 | PK       | Primary PK data   | February 24,  | Jan-11 | null   | March 21, 20  | Mar-12 | No Study Results Posted |
| 76 | Efficacy | No PK data        | July 29, 2010 | Aug-10 | null   | February 5, 2 | Feb-16 | No Study Results Posted |
| 77 | Efficacy | Secondary PK data | January 22, 2 | Jul-13 | Dec-21 | May 28, 2015  | May-15 | No Study Results Posted |

|    | AC | AD                 | AE                                                                                                    | AF | AG |
|----|----|--------------------|-------------------------------------------------------------------------------------------------------|----|----|
| 1  | 1  | <b>Primary Com</b> | <b>URL</b>                                                                                            |    |    |
| 2  | 2  | Jul-18             | <a href="https://ClinicalTrials.gov/show/NCT02539407">https://ClinicalTrials.gov/show/NCT02539407</a> |    |    |
| 3  | 3  | Dec-18             | <a href="https://ClinicalTrials.gov/show/NCT02935374">https://ClinicalTrials.gov/show/NCT02935374</a> |    |    |
| 4  | 4  | Sep-18             | <a href="https://ClinicalTrials.gov/show/NCT02899143">https://ClinicalTrials.gov/show/NCT02899143</a> |    |    |
| 5  | 5  | Apr-18             | <a href="https://ClinicalTrials.gov/show/NCT01595529">https://ClinicalTrials.gov/show/NCT01595529</a> |    |    |
| 6  | 6  | Feb-18             | <a href="https://ClinicalTrials.gov/show/NCT02380352">https://ClinicalTrials.gov/show/NCT02380352</a> |    |    |
| 7  | 7  | Jan-19             | <a href="https://ClinicalTrials.gov/show/NCT02891915">https://ClinicalTrials.gov/show/NCT02891915</a> |    |    |
| 8  | 8  | Sep-16             | <a href="https://ClinicalTrials.gov/show/NCT02746276">https://ClinicalTrials.gov/show/NCT02746276</a> |    |    |
| 9  | 9  | Aug-17             | <a href="https://ClinicalTrials.gov/show/NCT02917551">https://ClinicalTrials.gov/show/NCT02917551</a> |    |    |
| 10 | 10 | Jun-13             | <a href="https://ClinicalTrials.gov/show/NCT01243437">https://ClinicalTrials.gov/show/NCT01243437</a> |    |    |
| 11 | 11 | Mar-16             | <a href="https://ClinicalTrials.gov/show/NCT02635191">https://ClinicalTrials.gov/show/NCT02635191</a> |    |    |
| 12 | 12 | Dec-16             | <a href="https://ClinicalTrials.gov/show/NCT01522105">https://ClinicalTrials.gov/show/NCT01522105</a> |    |    |
| 13 | 13 | Dec-17             | <a href="https://ClinicalTrials.gov/show/NCT02456974">https://ClinicalTrials.gov/show/NCT02456974</a> |    |    |
| 14 | 14 | Sep-10             | <a href="https://ClinicalTrials.gov/show/NCT00579956">https://ClinicalTrials.gov/show/NCT00579956</a> |    |    |
| 15 | 15 | null               | <a href="https://ClinicalTrials.gov/show/NCT00545961">https://ClinicalTrials.gov/show/NCT00545961</a> |    |    |
| 16 | 16 | Feb-17             | <a href="https://ClinicalTrials.gov/show/NCT01431326">https://ClinicalTrials.gov/show/NCT01431326</a> |    |    |
| 17 | 17 | Nov-17             | <a href="https://ClinicalTrials.gov/show/NCT02475876">https://ClinicalTrials.gov/show/NCT02475876</a> |    |    |
| 18 | 18 | Dec-20             | <a href="https://ClinicalTrials.gov/show/NCT01420341">https://ClinicalTrials.gov/show/NCT01420341</a> |    |    |
| 19 | 19 | Nov-16             | <a href="https://ClinicalTrials.gov/show/NCT02266706">https://ClinicalTrials.gov/show/NCT02266706</a> |    |    |
| 20 | 20 | Sep-12             | <a href="https://ClinicalTrials.gov/show/NCT00867789">https://ClinicalTrials.gov/show/NCT00867789</a> |    |    |
| 21 | 21 | Dec-16             | <a href="https://ClinicalTrials.gov/show/NCT02879981">https://ClinicalTrials.gov/show/NCT02879981</a> |    |    |
| 22 | 22 | Jun-15             | <a href="https://ClinicalTrials.gov/show/NCT01269541">https://ClinicalTrials.gov/show/NCT01269541</a> |    |    |
| 23 | 23 | Jan-18             | <a href="https://ClinicalTrials.gov/show/NCT02276482">https://ClinicalTrials.gov/show/NCT02276482</a> |    |    |
| 24 | 24 | Dec-18             | <a href="https://ClinicalTrials.gov/show/NCT02663596">https://ClinicalTrials.gov/show/NCT02663596</a> |    |    |
| 25 | 25 | Sep-17             | <a href="https://ClinicalTrials.gov/show/NCT02555059">https://ClinicalTrials.gov/show/NCT02555059</a> |    |    |
| 26 | 26 | Apr-17             | <a href="https://ClinicalTrials.gov/show/NCT02297815">https://ClinicalTrials.gov/show/NCT02297815</a> |    |    |
| 27 | 27 | Dec-14             | <a href="https://ClinicalTrials.gov/show/NCT02224040">https://ClinicalTrials.gov/show/NCT02224040</a> |    |    |
| 28 | 28 | Aug-22             | <a href="https://ClinicalTrials.gov/show/NCT02775968">https://ClinicalTrials.gov/show/NCT02775968</a> |    |    |
| 29 | 29 | Aug-19             | <a href="https://ClinicalTrials.gov/show/NCT02687906">https://ClinicalTrials.gov/show/NCT02687906</a> |    |    |
| 30 | 30 | Dec-19             | <a href="https://ClinicalTrials.gov/show/NCT02783859">https://ClinicalTrials.gov/show/NCT02783859</a> |    |    |
| 31 | 31 | Apr-17             | <a href="https://ClinicalTrials.gov/show/NCT01994993">https://ClinicalTrials.gov/show/NCT01994993</a> |    |    |

|    | AC | AD     | AE                                          | AF | AG |
|----|----|--------|---------------------------------------------|----|----|
| 1  |    |        |                                             |    |    |
| 2  |    |        |                                             |    |    |
| 3  | 32 | Dec-17 | https://ClinicalTrials.gov/show/NCT02258763 |    |    |
| 4  | 33 | May-17 | https://ClinicalTrials.gov/show/NCT02688790 |    |    |
| 5  |    |        |                                             |    |    |
| 6  | 34 | Dec-12 | https://ClinicalTrials.gov/show/NCT00323219 |    |    |
| 7  | 35 | Feb-18 | https://ClinicalTrials.gov/show/NCT02750761 |    |    |
| 8  |    |        |                                             |    |    |
| 9  | 36 | Dec-17 | https://ClinicalTrials.gov/show/NCT02466438 |    |    |
| 10 | 37 | Sep-17 | https://ClinicalTrials.gov/show/NCT02260102 |    |    |
| 11 | 38 | Jun-16 | https://ClinicalTrials.gov/show/NCT02694458 |    |    |
| 12 | 39 | Feb-17 | https://ClinicalTrials.gov/show/NCT01540838 |    |    |
| 13 | 40 | null   | https://ClinicalTrials.gov/show/NCT00368498 |    |    |
| 14 |    |        |                                             |    |    |
| 15 | 41 | Dec-13 | https://ClinicalTrials.gov/show/NCT01785641 |    |    |
| 16 | 42 | Sep-20 | https://ClinicalTrials.gov/show/NCT02554383 |    |    |
| 17 | 43 | Mar-16 | https://ClinicalTrials.gov/show/NCT01265173 |    |    |
| 18 | 44 | Jan-17 | https://ClinicalTrials.gov/show/NCT02335905 |    |    |
| 19 |    |        |                                             |    |    |
| 20 | 45 | Dec-19 | https://ClinicalTrials.gov/show/NCT02922686 |    |    |
| 21 | 46 | Dec-20 | https://ClinicalTrials.gov/show/NCT02848820 |    |    |
| 22 | 47 | Oct-17 | https://ClinicalTrials.gov/show/NCT02475733 |    |    |
| 23 |    |        |                                             |    |    |
| 24 | 48 | May-17 | https://ClinicalTrials.gov/show/NCT02372461 |    |    |
| 25 | 49 | Aug-12 | https://ClinicalTrials.gov/show/NCT01553006 |    |    |
| 26 | 50 | Mar-17 | https://ClinicalTrials.gov/show/NCT02527681 |    |    |
| 27 |    |        |                                             |    |    |
| 28 | 51 | Sep-17 | https://ClinicalTrials.gov/show/NCT02210169 |    |    |
| 29 | 52 | Oct-17 | https://ClinicalTrials.gov/show/NCT02497781 |    |    |
| 30 | 53 | Apr-18 | https://ClinicalTrials.gov/show/NCT02814916 |    |    |
| 31 | 54 | Apr-17 | https://ClinicalTrials.gov/show/NCT02210325 |    |    |
| 32 |    |        |                                             |    |    |
| 33 | 55 | Nov-16 | https://ClinicalTrials.gov/show/NCT02801370 |    |    |
| 34 | 56 | Aug-18 | https://ClinicalTrials.gov/show/NCT02760420 |    |    |
| 35 | 57 | Aug-18 | https://ClinicalTrials.gov/show/NCT02678195 |    |    |
| 36 | 58 | Dec-17 | https://ClinicalTrials.gov/show/NCT02605122 |    |    |
| 37 |    |        |                                             |    |    |
| 38 | 59 | Feb-17 | https://ClinicalTrials.gov/show/NCT02570490 |    |    |
| 39 | 60 | Dec-16 | https://ClinicalTrials.gov/show/NCT02443285 |    |    |
| 40 | 61 | Jan-17 | https://ClinicalTrials.gov/show/NCT02334124 |    |    |
| 41 |    |        |                                             |    |    |
| 42 | 62 | Feb-17 | https://ClinicalTrials.gov/show/NCT02218372 |    |    |

1  
2  
3  
4  
5  
6  
7  
8  
9  
10  
11  
12  
13  
14  
15  
16  
17  
18  
19  
20  
21  
22  
23  
24  
25  
26  
27  
28  
29  
30  
31  
32  
33  
34  
35  
36  
37  
38  
39  
40  
41  
42  
43  
44  
45  
46  
47

|    | AC     | AD                                                                                                            | AE | AF | AG |
|----|--------|---------------------------------------------------------------------------------------------------------------|----|----|----|
| 63 | Jul-10 | <a href="https://ClinicalTrials.gov/show/NCT01032499">https://ClinicalTrials.gov/show/NCT01032499</a>         |    |    |    |
| 64 | Feb-16 | <a href="https://ClinicalTrials.gov/show/NCT02598362">https://ClinicalTrials.gov/show/NCT02598362</a>         |    |    |    |
| 65 | Mar-17 | <a href="https://ClinicalTrials.gov/show/NCT02878031">https://ClinicalTrials.gov/show/NCT02878031</a>         |    |    |    |
| 66 | Dec-17 | <a href="https://ClinicalTrials.gov/show/NCT02790996">https://ClinicalTrials.gov/show/NCT02790996</a>         |    |    |    |
| 67 | Oct-16 | <a href="https://ClinicalTrials.gov/show/NCT02712307">https://ClinicalTrials.gov/show/NCT02712307</a>         |    |    |    |
| 68 | Oct-17 | <a href="https://ClinicalTrials.gov/show/NCT02424734">https://ClinicalTrials.gov/show/NCT02424734</a>         |    |    |    |
| 69 | Dec-16 | <a href="https://ClinicalTrials.gov/show/NCT02134301">https://ClinicalTrials.gov/show/NCT02134301</a>         |    |    |    |
| 70 | Aug-16 | <a href="https://ClinicalTrials.gov/show/NCT02013141">https://ClinicalTrials.gov/show/NCT02013141</a>         |    |    |    |
| 71 | Jul-12 | <a href="https://ClinicalTrials.gov/show/NCT01427842">https://ClinicalTrials.gov/show/NCT01427842</a>         |    |    |    |
| 72 | Jun-11 | <a href="https://ClinicalTrials.gov/show/NCT01278017">https://ClinicalTrials.gov/show/NCT01278017</a>         |    |    |    |
| 73 | Feb-10 | <a href="https://ClinicalTrials.gov/show/NCT00988026">https://ClinicalTrials.gov/show/NCT00988026</a>         |    |    |    |
| 74 | Jun-18 | <a href="https://ClinicalTrials.gov/show/NCT02288234">https://ClinicalTrials.gov/show/NCT02288234</a>         |    |    |    |
| 75 | null   | <a href="https://ClinicalTrials.gov/show/NCT01304459">https://ClinicalTrials.gov/show/NCT01304459</a>         |    |    |    |
| 76 | Dec-16 | <a href="https://ClinicalTrials.gov/show/NCT01173575">https://ClinicalTrials.gov/show/NCT01173575</a>         |    |    |    |
| 77 | Dec-19 | <a href="https://clinicaltrials.gov/ct2/show/NCT01778634">https://clinicaltrials.gov/ct2/show/NCT01778634</a> |    |    |    |
