# Supplementary material for: Global shortage of neonatal and paediatric antibiotic trials: rapid review
Source: PubMed Central journal article supplement — BMJ Open. 2017 Oct 13;7(10):e016293. doi: 10.1136/bmjopen-2017-016293 (PMC5652566; doi:10.1136/bmjopen-2017-016293), 2017-10-13
Supplement: bmjopen-2017-016293supp001.pdf [file bmjopen-2017-016293supp001.pdf]

**DATASET**

|    | A                 | B                                                                                                            | C                  | D                    |
|----|-------------------|--------------------------------------------------------------------------------------------------------------|--------------------|----------------------|
| 1  | <b>NCT Number</b> | <b>Title</b>                                                                                                 | <b>Recruitment</b> | <b>Study Results</b> |
| 2  | NCT02539407       | Population Pharmacokinetics of Anti-infectives in Critically Ill Children                                    | Recruiting         | No Results Available |
| 3  | NCT02935374       | Effect of Antimicrobial Treatment of Acute Otitis Media on the Intestinal Microbiome in Children             | Not yet recruiting | No Results Available |
| 4  | NCT02899143       | Short-course Antimicrobial Therapy in Sepsis                                                                 | Recruiting         | No Results Available |
| 5  | NCT01595529       | The SCOUT Study: Short Course Therapy for Urinary Tract Infections in Children                               | Recruiting         | No Results Available |
| 6  | NCT02380352       | Short-course Antimicrobial Therapy for Paediatric Respiratory Infections                                     | Not yet recruiting | No Results Available |
| 7  | NCT02891915       | Trial to Evaluate Beta-Lactam Antimicrobial Therapy of Community Acquired Pneumonia in Children              | Recruiting         | No Results Available |
| 8  | NCT02746276       | Optimising Antibiotic Treatment for Sick Malnourished Children                                               | Recruiting         | No Results Available |
| 9  | NCT02917551       | BALANCE on the Wards: A Pilot RCT                                                                            | Not yet recruiting | No Results Available |
| 10 | NCT01243437       | A Clinical Trial to Evaluate the Safety and Efficacy of Ciprofloxacin in the Treatment of Plague in Children | Recruiting         | No Results Available |
| 11 | NCT02635191       | Tailored Therapy for Helicobacter Pylori in Children                                                         | Recruiting         | No Results Available |
| 12 | NCT01522105       | Daptomycin in Pediatric Patients With Bacterial Meningitis                                                   | Recruiting         | No Results Available |
| 13 | NCT02456974       | Antibiotic Dosing in Pediatric Intensive Care                                                                | Recruiting         | No Results Available |
| 14 | NCT00579956       | A Randomized Double Blinded Comparison of Ceftazidime and Meropenem in Severe Melioidosis                    | Recruiting         | No Results Available |
| 15 | NCT00545961       | Middle Meatal Bacteriology During Acute Respiratory Infection in Children                                    | Not yet recruiting | No Results Available |
| 16 | NCT01431326       | Pharmacokinetics of Understudied Drugs Administered to Children Per Standard of Care                         | Recruiting         | No Results Available |
| 17 | NCT02475876       | PK of Clindamycin and Trimethoprim-sulfamethoxazole in Infants and Children                                  | Recruiting         | No Results Available |
| 18 | NCT01420341       | Co-trimoxazole as Maintenance Therapy for Melioidosis                                                        | Recruiting         | No Results Available |
| 19 | NCT02266706       | Pharmacokinetic and Safety Study of Ceftolozane/Tazobactam in Pediatric Participants Receiving               | Recruiting         | No Results Available |
| 20 | NCT00867789       | Antibiotics Versus Placebo in the Treatment of Abscesses in the Emergency Department                         | Recruiting         | No Results Available |
| 21 | NCT02879981       | A Safety Study of Balsamic Bactrim in Pediatric Participants With Acute Bronchitis                           | Not yet recruiting | No Results Available |
| 22 | NCT01269541       | MESS-study MRSA Eradication Study Sk'ne                                                                      | Recruiting         | No Results Available |
| 23 | NCT02276482       | Study of Tedizolid Phosphate in Adolescents With Complicated Skin and Soft Tissue Infection (cS              | Recruiting         | No Results Available |
| 24 | NCT02663596       | Safety and TDM of Continuous Infusion Vancomycin Through Continuous Renal Replacement Th                     | Not yet recruiting | No Results Available |
| 25 | NCT02555059       | Special Drug Use Investigation of Ciproxan Injection in Pediatrics                                           | Recruiting         | No Results Available |
| 26 | NCT02297815       | Comparative Effectiveness of Antibiotics for Respiratory Infections                                          | Recruiting         | No Results Available |
| 27 | NCT02224040       | Typhoid Fever: Combined vs. Single Antibiotic Therapy                                                        | Recruiting         | No Results Available |
| 28 | NCT02775968       | Population Pharmacokinetics of Cephalosporins and Macrolides in Chinese Children With Comm                   | Not yet recruiting | No Results Available |
| 29 | NCT02687906       | Dose-finding, Pharmacokinetics, Safety, and Tolerability of Meropenem-Vaborbactam in Pediatr                 | Recruiting         | No Results Available |
| 30 | NCT02783859       | Hospitalised Pneumonia With Extended Treatment (HOPE) Study                                                  | Recruiting         | No Results Available |
| 31 | NCT01994993       | Antibiotic Safety (SCAMP)                                                                                    | Recruiting         | No Results Available |

|    | A           | B                                                                                                 | C                  | D                    |
|----|-------------|---------------------------------------------------------------------------------------------------|--------------------|----------------------|
| 32 | NCT02258763 | Trial on the Ideal Duration of Oral Antibiotics in Children With Pneumonia                        | Recruiting         | No Results Available |
| 33 | NCT02688790 | Study Evaluate the PK Profile of Dalbavancin in Hospitalized Infants and Neonates Patients With   | Recruiting         | No Results Available |
| 34 | NCT00323219 | Oral Moxifloxacin Versus Cefazolin and Oral Probenecid in the Management of Skin and Soft Tis     | Recruiting         | No Results Available |
| 35 | NCT02750761 | A Study of Oral and Intravenous (IV) Tedizolid Phosphate in Hospitalized Participants, Ages 2 to  | Recruiting         | No Results Available |
| 36 | NCT02466438 | Safety and Pharmacokinetics of Piperacillin-tazobactam Extended Infusion in Infants and Childre   | Recruiting         | No Results Available |
| 37 | NCT02260102 | Temocillin Pharmacokinetics in Paediatrics                                                        | Not yet recruiting | No Results Available |
| 38 | NCT02694458 | Comparison of Two Dosage Adjustment Strategies of Vancomycin in Children                          | Recruiting         | No Results Available |
| 39 | NCT01540838 | Slow Initial beta-lactam Infusion With High-dose Paracetamol to Improve the Outcomes of Child     | Recruiting         | No Results Available |
| 40 | NCT00368498 | A Trial to Evaluate the Loading Dose Required to Achieve Therapeutic Serum Teicoplanin Concer     | Recruiting         | No Results Available |
| 41 | NCT01785641 | Single Versus Combined Antibiotic Therapy for Bacterial Peritonitis in CAPD Patients              | Recruiting         | No Results Available |
| 42 | NCT02554383 | Efficacy of Antibiotics in Children With Acute Sinusitis: Which Subgroups Benefit?                | Recruiting         | No Results Available |
| 43 | NCT01265173 | Comparison of Efficacy of Cefotaxime, Ceftriaxone, and Ciprofloxacin for the Treatment of Spon    | Recruiting         | No Results Available |
| 44 | NCT02335905 | Ceftaroline for Treatment of Hematogenously Acquired Staphylococcus Aureus Osteomyelitis in       | Recruiting         | No Results Available |
| 45 | NCT02922686 | Penicillin for the Emergency Department Outpatient Treatment of CELLulitis                        | Not yet recruiting | No Results Available |
| 46 | NCT02848820 | Initial Non-operative Treatment Strategy Versus Appendectomy Treatment Strategy for Simple A      | Not yet recruiting | No Results Available |
| 47 | NCT02475733 | Evaluation of Safety, Pharmacokinetics and Efficacy of CAZ-AVI With Metronidazole in Childern A   | Recruiting         | No Results Available |
| 48 | NCT02372461 | Randomized Trial of Amoxicillin Versus Placebo for (Fast Breathing) Pneumonia                     | Recruiting         | No Results Available |
| 49 | NCT01553006 | Study of Cefditoren Pivoxil in Treatment of Childhood With Acute Rhinosinusitis                   | Recruiting         | No Results Available |
| 50 | NCT02527681 | Pharmacokinetics and Safety of Ceftobiprole in Neonates and Infants up to 3 Months Treated W      | Recruiting         | No Results Available |
| 51 | NCT02210169 | RCT of Continuous Versus Intermittent Infusion of Vancomycin in Neonates                          | Recruiting         | No Results Available |
| 52 | NCT02497781 | Evaluation of Safety, Pharmacokinetics and Efficacy of Ceftazidime and Avibactam (CAZ-AVI ) Co    | Recruiting         | No Results Available |
| 53 | NCT02814916 | Dalbavancin for the Treatment of Acute Bacterial Skin and Skin Structure Infections in Children,  | Not yet recruiting | No Results Available |
| 54 | NCT02210325 | Efficacy and Safety Study of Oral Solithromycin Compared to Intramuscular Ceftriaxone Plus Ora    | Recruiting         | No Results Available |
| 55 | NCT02801370 | Phase 3 Study of OTO-201 in Acute Otitis Externa                                                  | Recruiting         | No Results Available |
| 56 | NCT02760420 | 3 Days Amoxicillin Versus Placebo for Fast Breathing Childhood Pneumonia in Malawi                | Recruiting         | No Results Available |
| 57 | NCT02678195 | 3 Days Versus 5 Days Amoxicillin for Chest-indrawing Childhood Pneumonia in Malawi                | Recruiting         | No Results Available |
| 58 | NCT02605122 | Safety and Efficacy of Solithromycin in Adolescents and Children With Community-acquired Bact     | Recruiting         | No Results Available |
| 59 | NCT02570490 | Oral Sodium Fusidate (CEM-102) Versus Oral Linezolid for the Treatment of Acute Bacterial Skin    | Recruiting         | No Results Available |
| 60 | NCT02443285 | Is Spontaneous Bacterial Peritonitis Still Responding to 3rd Generation Cephalosporins?           | Recruiting         | No Results Available |
| 61 | NCT02334124 | Comparing the Intravenous Treatment of Skin Infections in Children, Home Versus Hospital          | Recruiting         | No Results Available |
| 62 | NCT02218372 | A Study to Investigate the Safety and Efficacy of Fidaxomicin (Oral Suspension or Tablets) and Va | Recruiting         | No Results Available |

|    | A           | B                                                                                                | C                  | D                    |
|----|-------------|--------------------------------------------------------------------------------------------------|--------------------|----------------------|
| 63 | NCT01032499 | Open and Comparative Study to Measure Tolerability and Efficacy of Taro Elixir                   | Not yet recruiting | No Results Available |
| 64 | NCT02598362 | Pharmacokinetics of Ciprofloxacin in Pediatric Patients                                          | Recruiting         | No Results Available |
| 65 | NCT02878031 | Community Case Management of Chest Indrawing Pneumonia                                           | Recruiting         | No Results Available |
| 66 | NCT02790996 | Neonatal Vancomycin Trial                                                                        | Not yet recruiting | No Results Available |
| 67 | NCT02712307 | Study of 5 and 10 Days Treatment With Penicillin Against Sore Throat Caused by Streptococci      | Recruiting         | No Results Available |
| 68 | NCT02424734 | Safety, Tolerability and Efficacy of Ceftaroline in Paediatrics With Late-Onset Sepsis           | Recruiting         | No Results Available |
| 69 | NCT02134301 | Open-Label, Dose-Finding, Pharmacokinetics, Safety and Tolerability Study of Oritavancin in Ped  | Recruiting         | No Results Available |
| 70 | NCT02013141 | An Open-Label Study of the Pharmacokinetics of a Single Dose of Telavancin in Pediatric Subject  | Recruiting         | No Results Available |
| 71 | NCT01427842 | Dose Enhancement of Vancomycin IN Everyday Patients                                              | Recruiting         | No Results Available |
| 72 | NCT01278017 | The Role of Short-course Ceftriaxone Therapy in the Treatment of Severe Nontyphoidal Salmonel    | Recruiting         | No Results Available |
| 73 | NCT00988026 | Safety and Efficacy Comparison of Minocycline Microgranules Versus Lymecycline in the Treatm     | Recruiting         | No Results Available |
| 74 | NCT02288234 | Telavancin Observational Use Registry (TOUR)                                                     | Recruiting         | No Results Available |
| 75 | NCT01304459 | Vancomycin Serum Concentrations in Pediatric Oncology Patients Under Intensive Care              | Recruiting         | No Results Available |
| 76 | NCT01173575 | Assessment of the Efficacy of FOSFOMYCIN in Patients With Bacterial Infection                    | Recruiting         | No Results Available |
| 77 | NCT01778634 | Trial of Intravenous Azithromycin to Eradicate Ureaplasma Respiratory Tract Infection in Preterm | Recruiting         | No Results Available |

|    | E                                                                  | F                         |
|----|--------------------------------------------------------------------|---------------------------|
| 1  | <b>Indication</b>                                                  | <b>Infection category</b> |
| 2  | Proven or suspected infection (in patients on PICU)                | 9                         |
| 3  | Acute Otitis Media                                                 | 3                         |
| 4  | Sepsis                                                             | 8                         |
| 5  | Urinary Tract Infections (UTI)                                     | 7                         |
| 6  | Community-acquired Pneumonia (CAP)                                 | 4                         |
| 7  | Pneumonia                                                          | 4                         |
| 8  | Proven or suspected infection in patients with malnutrition        | 9                         |
| 9  | Bacteremia                                                         | 8                         |
| 10 | Plague                                                             | 8                         |
| 11 | Helicobacter Pylori Infection                                      | 7                         |
| 12 | Meningitis                                                         | 1                         |
| 13 | Proven or suspected bacterial infection (Pharmacokinetics)         | 9                         |
| 14 | Melioidosis                                                        | 8                         |
| 15 | Acute Respiratory Infection   Sinusitis                            | 3                         |
| 16 | Various infections (including nosocomial Pneumonia, CAP, Acute Bac | Various                   |
| 17 | Bacterial Infections                                               | 9                         |
| 18 | Melioidosis                                                        | 8                         |
| 19 | Proven or Suspected Gram-negative Bacterial Infection              | 9                         |
| 20 | Abscess                                                            | 1                         |
| 21 | Bronchitis                                                         | 4                         |
| 22 | Throatcarriers of MRSA                                             | 3                         |
| 23 | Acute Skin and Soft Tissue infections (aSSTIs)                     | 2                         |
| 24 | Proven or suspected bacterial infection (in CRRT patients)         | 9                         |
| 25 | Cystitis / Pyelonephritis                                          | 7                         |
| 26 | Acute Upper Respiratory Tract Infections (ARTIs)                   | 3                         |
| 27 | Typhoid Fever                                                      | 8                         |
| 28 | Community Acquired Pneumonia (CAP)                                 | 4                         |
| 29 | Bacterial Infections                                               | 9                         |
| 30 | Pneumonia                                                          | 4                         |
| 31 | Complicated Intra Abdominal Infections (cIAIs)                     | 6                         |

|    | E                                                           | F |
|----|-------------------------------------------------------------|---|
| 32 | Pneumonia                                                   | 4 |
| 33 | Bacterial Infections                                        | 9 |
| 34 | Cellulitis                                                  | 2 |
| 35 | Gram-Positive Bacterial Infections                          | 9 |
| 36 | Infection                                                   | 9 |
| 37 | Urinary Tract Infection or suspected Cholangitis            | 7 |
| 38 | Methicillin-resistant Staphylococcal Infections             | 9 |
| 39 | Bacterial Meningitis                                        | 1 |
| 40 | Staphylococcal Infections                                   | 9 |
| 41 | Peritonitis (in CAPD patients)                              | 6 |
| 42 | Acute Sinusitis (Respiratory Tract Infections)              | 3 |
| 43 | SBP in patients with Liver Cirrhosis                        | 6 |
| 44 | Hematogenously Acquired Staphylococcus Aureus Osteomyelitis | 5 |
| 45 | Cellulitis or Wound Infection                               | 8 |
| 46 | Appendicitis                                                | 6 |
| 47 | Complicated Intra-abdominal Infections (cIAls)              | 6 |
| 48 | Pneumonia (fast-breathing)                                  | 4 |
| 49 | Rhinosinusitis                                              | 3 |
| 50 | Bacterial Infections                                        | 9 |
| 51 | Sepsis                                                      | 8 |
| 52 | Complicated Urinary Tract Infections (cUTIs)                | 7 |
| 53 | Methicillin-Resistant Staphylococcus Aureus Skin Infection  | 2 |
| 54 | Uncomplicated Urogenital Gonorrhea                          | 7 |
| 55 | Acute Otitis Externa                                        | 3 |
| 56 | Pneumonia                                                   | 4 |
| 57 | Pneumonia                                                   | 4 |
| 58 | Community-acquired Bacterial Pneumonia                      | 4 |
| 59 | Acute Bacterial Skin and Skin Structure Infections          | 2 |
| 60 | Primary Bacterial Peritonitis                               | 6 |
| 61 | Cellulitis                                                  | 8 |
| 62 | Clostridium Difficile-associated Diarrhea (CDAD)            | 6 |

|    | E                                                                    | F       |
|----|----------------------------------------------------------------------|---------|
| 63 | Acne Vulgaris II or III Degree                                       | 2       |
| 64 | Urinary Tract Infection or Pyelonephritis                            | 7       |
| 65 | Pneumonia                                                            | 4       |
| 66 | Late Onset Neonatal Sepsis                                           | 8       |
| 67 | Tonsillitis                                                          | 3       |
| 68 | Late-onset Sepsis                                                    | 8       |
| 69 | Gram Positive Bacterial Infections                                   | 9       |
| 70 | Gram-Positive Bacterial Infections                                   | 9       |
| 71 | Vancomycin Therapy                                                   | 9       |
| 72 | Diarrhea                                                             | 6       |
| 73 | Mild to Moderate Acne                                                | 2       |
| 74 | Hospital Acquired Bacterial Pneumonia (HAP), Complicated Skin and    | Various |
| 75 | Infection                                                            | 9       |
| 76 | Bacterial Infection                                                  | 9       |
| 77 | Eradicate ureaplasma respiratory tract infection from preterm infant | 4       |

|    | G                                                                                | H                                  | I             | J                     |
|----|----------------------------------------------------------------------------------|------------------------------------|---------------|-----------------------|
| 1  | <b>Interventions</b>                                                             | <b>Antibiotic class (J01 code)</b> | <b>Gender</b> | <b>Age</b>            |
| 2  | Antiinfectives (beta-lactam, aminoglycoside, glycopeptide, fluoroquinolone,      | Various                            | Both          | Up to 18 Years        |
| 3  | Amoxicillin, Amoxicillin-Potassium Clavulanate, Macrolide                        | Various                            | Both          | 6 Months to 7 Years   |
| 4  | Antibiotic                                                                       | J01                                | Both          | Up to 18 years        |
| 5  | Trimethoprim sulfamethoxazole, cefixime, or cephalexin                           | Various                            | Both          | 2 Months to 10 Years  |
| 6  | Amoxicillin                                                                      | J01C                               | Both          | 6 Months to 10 Years  |
| 7  | Amoxicillin, Amoxicillin-clavulanate, Cefdinir                                   | Various                            | Both          | 6 Months to 71 Months |
| 8  | Ceftriaxone, Metronidazole                                                       | J01D                               | Both          | 2 Months to 59 Months |
| 9  | 7 days vs 14 days of adequate antibiotic treatment                               | J01                                | Both          | Up to 18 years        |
| 10 | Ciprofloxacin, doxyxcycline                                                      | Various                            | Both          | 8 Years and older     |
| 11 | Tailored vs standard therapy (Amoxicillin, Clarithromycin, Metronidazole, Ra     | Various                            | Both          | 4 Years to 18 Years   |
| 12 | Daptomycin                                                                       | J01X                               | Both          | 3 Months to 16 Years  |
| 13 | Amoxicillin-clavulanate, Piperacilline-tazobactam, Vancomycin                    | Various                            | Both          | Up to 16 Years        |
| 14 | Meropenem, Ceftazidime                                                           | J01D                               | Both          | 15 Years and older    |
| 15 | Amoxicillin clavulanate acid                                                     | J01C                               | Both          | 6 Years to 13 Years   |
| 16 | Various drugs (Ceftazidime, Ciprofloxacin, Clindamycin, Doxycycline, Levoflo     | Various                            | Both          | Up to 18 years        |
| 17 | Clindamycin, Trimethoprim-sulfamethoxazole                                       | Various                            | Both          | 1 Month to 16 Years   |
| 18 | Co-trimoxazole                                                                   | J01E                               | Both          | 15 Years and older    |
| 19 | Ceftolozane/Tazobactam                                                           | J01D                               | Both          | Up to 17 Years        |
| 20 | Trimethoprim-sulfamethoxazole                                                    | J01E                               | Both          | 3 Months to 17 Years  |
| 21 | Guaifenesin, Sulfamethoxazole trimethoprim                                       | J01E                               | Both          | 4 Years to 14 Years   |
| 22 | Systemic Rifampin and Clindamycine/Trimehoprimsulfa, or Topical mupiroci         | Various                            | Both          | 5 Years and older     |
| 23 | Tedizolid Phosphate                                                              | J01X                               | Both          | 12 Years to 18 Years  |
| 24 | Vancomycin                                                                       | J01X                               | Both          | Up to 18 years        |
| 25 | Ciprofloxacin                                                                    | J01F                               | Both          | Up to 14 Years        |
| 26 | Antibiotics (Amoxicillin-clavulanate, azithromycin, cefdinir, cefprozil, cefurox | Various                            | Both          | 6 Months to 18 Years  |
| 27 | Ceftriaxone, Ceftriaxone/azithromycin, Azithromycin, Azithromycin/cefixime       | Various                            | Both          | 2 Years to 80 Years   |
| 28 | Cephalosporins and Macrolides                                                    | Various                            | Both          | 1 Year to 18 Years    |
| 29 | Carbavance                                                                       | J01D                               | Both          | Up to 17 Years        |
| 30 | Amoxicillin-clavulanic Acid                                                      | J01C                               | Both          | 3 Months to 5 Years   |
| 31 | Ampicillin/metronidazole/gentamicin/clindamycin/Piperacillin-tazobactam c        | Various                            | Both          | Up to 120 Days        |

|    | G                                                                       | H       | I    | J                     |
|----|-------------------------------------------------------------------------|---------|------|-----------------------|
| 32 | Amoxicillin-Potassium Clavulanate                                       | J01C    | Both | 3 Months to 59 Months |
| 33 | Dalbavancin                                                             | J01X    | Both | Up to 28 Days         |
| 34 | Cefazolin/Moxifloxacin                                                  | Various | Both | Up to 18 Years        |
| 35 | Tedizolid Phosphate                                                     | J01X    | Both | 2 Years to 11 Years   |
| 36 | Piperacillin-tazobactam                                                 | J01C    | Both | 2 Months to 6 Years   |
| 37 | Temocillin                                                              | J01C    | Both | 6 Months to 3 Years   |
| 38 | Vancomycin                                                              | J01X    | Both | 1 Month to 16 Years   |
| 39 | Beta-lactam                                                             | J01C    | Both | 2 Months to 15 Years  |
| 40 | Teicoplanin                                                             | J01X    | Both | 16 Years and older    |
| 41 | Ceftazidime/ciprofloxacin, Ceftazidime, Cefazolin/gentamicin, Cefazolin | Various | Both | 15 Years and older    |
| 42 | Amoxicillin-clavulanate                                                 | J01C    | Both | 2 Years to 11 Years   |
| 43 | Cefotaxime, Ceftriaxone, Ciprofloxacin                                  | Various | Both | 16 Years and older    |
| 44 | Ceftaroline Fosamil                                                     | J01D    | Both | 1 Year to 17 Years    |
| 45 | Flucloxacillin, Phenoxyethylpenicillin                                  | J01C    | Both | 16 Years and older    |
| 46 | Augmentin/Gentamicin, Appendectomy                                      | J01C    | Both | 7 Years to 17 Years   |
| 47 | Ceftazidime-avibactam, Meropenem, Metronidazole                         | Various | Both | 3 Months to 18 Years  |
| 48 | Amoxicillin                                                             | J01C    | Both | 2 Months to 59 Months |
| 49 | Cefditoren pivoxil                                                      | J01D    | Both | 1 Year to 15 Years    |
| 50 | Ceftobiprole                                                            | J01D    | Both | Up to 3 Months        |
| 51 | Vancomycin                                                              | J01X    | Both | Up to 90 Days         |
| 52 | Ceftazidime-avibactam, Cefepime                                         | J01D    | Both | 3 Months to 18 Years  |
| 53 | Dalbavancin single dose                                                 | J01X    | Both | 3 Months to 17 Years  |
| 54 | Solithromycin, Ceftriaxone, Azithromycin                                | Various | Both | 15 Years and older    |
| 55 | Ciprofloxacin                                                           | J01M    | Both | 6 Months and older    |
| 56 | Amoxicillin                                                             | J01C    | Both | 2 Months to 59 Months |
| 57 | Amoxicillin                                                             | J01C    | Both | 2 Months to 59 Months |
| 58 | Solithromycin                                                           | J01F    | Both | 2 Months to 17 Years  |
| 59 | Sodium fusidate, Linezolid                                              | J01X    | Both | 12 Years and older    |
| 60 | Cefotaxime, Ceftriaxone                                                 | J01D    | Both | Up to 18 Years        |
| 61 | Ceftriaxone, Flucloxacillin                                             | Various | Both | 6 Months to 18 Years  |
| 62 | Fidaxomicin, Vancomycin                                                 | J01X    | Both | Up to 17 Years        |



|    | G                        | H    | I    | J                     |
|----|--------------------------|------|------|-----------------------|
| 63 | Taro Elixir              | J01A | Both | 14 Years and older    |
| 64 | Ciprofloxacin            | J01M | Both | 3 Months to 17 Years  |
| 65 | Amoxicillin              | J01C | Both | 2 Months to 59 Months |
| 66 | Vancomycin               | J01X | Both | Up to 90 Days         |
| 67 | Phenoxymethylpenicillin  | J01C | Both | 6 Years and older     |
| 68 | Ceftaroline Fosamil      | J01D | Both | Up to 59 Days         |
| 69 | Oritavancin              | J01X | Both | Up to 18 Years        |
| 70 | Telavancin               | J01X | Both | 1 Year to 17 Years    |
| 71 | Vancomycin               | J01X | Both | 16 Years and older    |
| 72 | Ceftriaxone              | J01D | Both | 3 Months to 18 Years  |
| 73 | Minocycline, Lymecycline | J01A | Both | 14 Years to 30 Years  |
| 74 | Telavancin               | J01X | Both | Up to 18 Years        |
| 75 | Vancomycin               | J01X | Both | Up to 18 Years        |
| 76 | Fosfomycin               | J01X | Both | Up to 18 Years        |
| 77 | Azithromycin             | J01F | Both | 0 to 72 hours         |

|    | K         | L                    | M                                  | N                           | O                 |
|----|-----------|----------------------|------------------------------------|-----------------------------|-------------------|
| 1  | Age group | Estimated enrollment | Location                           | Income class                | Geographic region |
| 2  | 8         | 1850                 | France                             | High income                 | Europe            |
| 3  | 9         | 150                  | Finland                            | High income                 | Europe            |
| 4  | 8         | 320                  | Italy                              | High income                 | Europe            |
| 5  | 9         | 746                  | United States                      | High income                 | North America     |
| 6  | 9         | 270                  | Canada                             | High income                 | North America     |
| 7  | 9         | 400                  | United States                      | High income                 | North America     |
| 8  | 9         | 80                   | Kenya                              | Lower middle income         | Africa            |
| 9  | 8         | 50                   | Canada                             | High income                 | North America     |
| 10 | 11        | 200                  | Uganda                             | Low income                  | Africa            |
| 11 | 11        | 200                  | China                              | Upper middle income         | Asia              |
| 12 | 10        | 5                    | Switzerland                        | High income                 | Europe            |
| 13 | 8         | 200                  | Belgium                            | High income                 | Europe            |
| 14 | 5         | 750                  | Thailand                           | Upper middle income         | Asia              |
| 15 | 11        | 120                  | Finland                            | High income                 | Europe            |
| 16 | 8         | 3000                 | Various (United States, Canada)    | High income                 | International     |
| 17 | 10        | 54                   | United States                      | High income                 | North America     |
| 18 | 5         | 800                  | Thailand                           | Upper middle income         | Asia              |
| 19 | 8         | 36                   | United States                      | High income                 | North America     |
| 20 | 10        | 200                  | United States                      | High income                 | North America     |
| 21 | 11        | 50                   | Peru                               | Upper middle income         | Latin America     |
| 22 | 11        | 69                   | Sweden                             | High income                 | North America     |
| 23 | 5         | 162                  | Various (United States, Argentina) | Upper middle to High income | International     |
| 24 | 8         | 10                   | United States                      | High income                 | North America     |
| 25 | 8         | 45                   | Japan                              | High income                 | Asia              |
| 26 | 10        | 117000               | United States                      | High income                 | North America     |
| 27 | 11        | 120                  | Nepal                              | Low income                  | Asia              |
| 28 | 10        | 750                  | China                              | Upper middle income         | Asia              |
| 29 | 8         | 56                   | United States                      | High income                 | North America     |
| 30 | 9         | 314                  | Various (Australia, Malaysia)      | High income                 | Oceania           |
| 31 | 6         | 284                  | Various (United States, Canada)    | High income                 | North America     |

|    | K  | L    | M                              | N                           | O             |
|----|----|------|--------------------------------|-----------------------------|---------------|
| 32 | 9  | 300  | Malaysia                       | Upper middle income         | Asia          |
| 33 | 2  | 24   | United States                  | High income                 | North America |
| 34 | 8  | 390  | Canada                         | High income                 | North America |
| 35 | 4  | 32   | United States                  | High income                 | North America |
| 36 | 9  | 141  | Canada                         | High income                 | North America |
| 37 | 9  | 45   | Belgium                        | High income                 | Europe        |
| 38 | 10 | 100  | France                         | High income                 | Europe        |
| 39 | 10 | 400  | Angola                         | Upper middle income         | Africa        |
| 40 | 5  | 20   | Taiwan, China                  | High income                 | Asia          |
| 41 | 5  | 300  | Thailand                       | Upper middle income         | Asia          |
| 42 | 4  | 688  | United States                  | High income                 | North America |
| 43 | 5  | 261  | Republic of Korea              | High income                 | Asia          |
| 44 | 10 | 18   | United States                  | High income                 | North America |
| 45 | 5  | 414  | Ireland                        | High income                 | Europe        |
| 46 | 11 | 334  | Netherlands                    | High income                 | Europe        |
| 47 | 10 | 102  | Various (United States, Argent | Upper middle to High income | International |
| 48 | 9  | 2500 | Pakistan                       | Lower middle income         | Asia          |
| 49 | 10 | 120  | Thailand                       | Upper middle income         | Asia          |
| 50 | 6  | 45   | Various (Belgium, Germany, Li  | High income                 | Europe        |
| 51 | 6  | 200  | Australia                      | High income                 | Oceania       |
| 52 | 10 | 102  | Various (United States, Czech  | Upper middle to High income | International |
| 53 | 10 | 300  | United States                  | High income                 | North America |
| 54 | 5  | 300  | Various (United States, Austra | High income                 | International |
| 55 | 10 | 500  | Various (United States, Canad  | High income                 | North America |
| 56 | 9  | 2000 | Malawi                         | Low income                  | Africa        |
| 57 | 9  | 2000 | Malawi                         | Low income                  | Africa        |
| 58 | 10 | 400  | Various (United States, Bulgar | High income                 | International |
| 59 | 5  | 712  | Various (United States, Puertc | High income                 | International |
| 60 | 8  | 100  | Egypt                          | Lower middle income         | Africa        |
| 61 | 10 | 188  | Australia                      | High income                 | Oceania       |
| 62 | 8  | 144  | Various (United States, Belgiu | High income                 | International |

|    | K  | L    | M                                | N                   | O             |
|----|----|------|----------------------------------|---------------------|---------------|
| 63 | 5  | 120  | Brazil                           | Upper middle income | Latin America |
| 64 | 10 | 20   | Belgium                          | High income         | Europe        |
| 65 | 9  | 308  | Nigeria                          | Lower middle income | Africa        |
| 66 | 6  | 300  | Various (United Kingdom, France) | High income         | Europe        |
| 67 | 11 | 432  | Sweden                           | High income         | Europe        |
| 68 | 7  | 24   | Various (United States, Hungary) | High income         | International |
| 69 | 8  | 60   | United States                    | High income         | North America |
| 70 | 10 | 32   | United States                    | High income         | North America |
| 71 | 5  | 100  | Australia                        | High income         | Oceania       |
| 72 | 10 | 200  | Taiwan, China                    | High income         | Asia          |
| 73 | 5  | 168  | Mexico                           | High income         | North America |
| 74 | 8  | 1000 | United States                    | High income         | North America |
| 75 | 8  | 50   | Brazil                           | Upper middle income | Latin America |
| 76 | 8  | 200  | Various (Austria, Germany)       | High income         | Europe        |
| 77 | 1  | 180  | United States                    | High income         | North America |

|    | P                                                    | Q              | R                  | S              | T                              |
|----|------------------------------------------------------|----------------|--------------------|----------------|--------------------------------|
| 1  | <b>Collaborators</b>                                 | <b>Sponsor</b> | <b>Study Types</b> | <b>Phase</b>   | <b>Endpoint classification</b> |
| 2  | Assistance Publique - Hopitaux de Paris              | Hospital       | Observational      | Not applicable | Pharmacokinetics               |
| 3  | University of Oulu Oulu University Hospital          | University     | Interventional     | Phase 4        | Efficacy                       |
| 4  | Ospedale Santa Maria delle Croci                     | Hospital       | Interventional     | Phase 2        | Safety/Efficacy                |
| 5  | Children's Hospital of Philadelphia Children's Ho    | Hospital       | Interventional     | Phase 2        | Safety/Efficacy                |
| 6  | Hamilton Health Sciences Corporation Children's      | Hospital       | Interventional     | Phase 4        | Safety/Efficacy                |
| 7  | National Institute of Allergy and Infectious Disease | NIH            | Interventional     | Phase 4        | Efficacy                       |
| 8  | University of Oxford KEMRI Wellcome Trust Rese       | University     | Interventional     | Phase 2        | Pharmacokinetics               |
| 9  | Sunnybrook Health Sciences Centre                    | Hospital       | Interventional     | Not specified  | Efficacy                       |
| 10 | Centers for Disease Control and Prevention MRC       | CDC            | Interventional     | Phase 2        | Safety/Efficacy                |
| 11 | Beijing Children's Hospital                          | Hospital       | Interventional     | Phase 4        | Safety/Efficacy                |
| 12 | University Hospital Inselspital, Berne               | Hospital       | Interventional     | Phase 1        | Pharmacokinetics               |
| 13 | University Hospital, Ghent University Hospital, A    | Hospital       | Observational      | Not applicable | Pharmacokinetics               |
| 14 | University of Oxford Mahidol University Wellcor      | University     | Interventional     | Not specified  | Efficacy                       |
| 15 | Oulu University Hospital                             | University     | Interventional     | Phase 4        | Safety/Efficacy                |
| 16 | Daniel Benjamin Eunice Kennedy Shriver Nationa       | University     | Observational      | Not applicable | Pharmacokinetics               |
| 17 | Michael Cohen-Wolkowicz Eunice Kennedy Shriv         | University     | Interventional     | Phase 1        | Pharmacokinetics               |
| 18 | Khon Kaen University                                 | University     | Interventional     | Not specified  | Efficacy                       |
| 19 | Cubist Pharmaceuticals LLC                           | Industry       | Interventional     | Phase 1        | Pharmacokinetics               |
| 20 | Children's Mercy Hospital Kansas City Blue Cross     | Hospital       | Interventional     | Not specified  | Efficacy                       |
| 21 | Hoffmann-La Roche                                    | Industry       | Observational      | Not applicable | Safety                         |
| 22 | Region Skane                                         | Hospital       | Interventional     | Not specified  | Efficacy                       |
| 23 | Cubist Pharmaceuticals LLC                           | Industry       | Interventional     | Phase 3        | Safety                         |
| 24 | Drexel University The Center for Pediatric Pharm     | University     | Interventional     | Phase 1        | Safety                         |
| 25 | Bayer                                                | Industry       | Observational      | Not applicable | Safety/Efficacy                |
| 26 | Children's Hospital of Philadelphia                  | Hospital       | Observational      | Not applicable | Safety/Efficacy                |
| 27 | Sheba Medical Center                                 | Hospital       | Interventional     | Phase 4        | Efficacy                       |
| 28 | Beijing Children's Hospital                          | Hospital       | Observational      | Not applicable | Pharmacokinetics               |
| 29 | Rempex Pharmaceuticals (a wholly owned subsidi       | Industry       | Interventional     | Phase 1        | Safety                         |
| 30 | Menzies School of Health Research Griffith Univ      | University     | Interventional     | Phase 4        | Safety/Efficacy                |
| 31 | Michael Cohen-Wolkowicz The EMMES Corpora            | University     | Interventional     | Phase 2-3      | Safety                         |

|    | P                                                                                | Q                   | R              | S             | T                |
|----|----------------------------------------------------------------------------------|---------------------|----------------|---------------|------------------|
| 32 | University of Malaya   Menzies School of Health Research                         | University          | Interventional | Phase 4       | Efficacy         |
| 33 | Durata Therapeutics Inc., an affiliate of Allergan                               | Industry            | Interventional | Phase 1       | Pharmacokinetics |
| 34 | University of British Columbia                                                   | University          | Interventional | Phase 3       | Efficacy         |
| 35 | Merck Sharp & Dohme Corp.                                                        | Industry            | Interventional | Phase 1       | Pharmacokinetics |
| 36 | St. Justine's Hospital                                                           | Hospital            | Interventional | Phase 1       | Pharmacokinetics |
| 37 | Université Catholique de Louvain                                                 | University          | Interventional | Phase 4       | Pharmacokinetics |
| 38 | Assistance Publique - Hôpitaux de Paris                                          | Hospital            | Interventional | Not specified | Pharmacokinetics |
| 39 | Helsinki University   Foundation for Paediatric Research                         | University          | Interventional | Phase 4       | Safety/Efficacy  |
| 40 | National Taiwan University Hospital                                              | University          | Interventional | Phase 4       | Pharmacokinetics |
| 41 | Chulalongkorn University                                                         | University          | Interventional | Not specified | Efficacy         |
| 42 | University of Pittsburgh   National Institute of Allergy and Infectious Diseases | University          | Interventional | Phase 3       | Safety/Efficacy  |
| 43 | Korea University                                                                 | University          | Interventional | Phase 4       | Efficacy         |
| 44 | Baylor College of Medicine   Forest Laboratories                                 | University          | Interventional | Phase 1-2     | Safety/Efficacy  |
| 45 | Royal College of Surgeons, Ireland   Health Research Board                       | University          | Interventional | Phase 4       | Efficacy         |
| 46 | Ramon Gorter   ZonMw: The Netherlands Organisation for Scientific Research       | University          | Interventional | Phase 4       | Efficacy         |
| 47 | AstraZeneca   PRA Health Sciences                                                | Industry            | Interventional | Phase 2       | Safety/Efficacy  |
| 48 | Aga Khan University                                                              | University          | Interventional | Not specified | Efficacy         |
| 49 | Thammasat University                                                             | University          | Interventional | Phase 4       | Safety/Efficacy  |
| 50 | Basilea Pharmaceutica                                                            | Industry            | Interventional | Phase 1       | Pharmacokinetics |
| 51 | Murdoch Childrens Research Institute   Royal Children's Hospital                 | University          | Interventional | Not specified | Pharmacokinetics |
| 52 | AstraZeneca   PRA Health Sciences                                                | Industry            | Interventional | Phase 2       | Safety/Efficacy  |
| 53 | Durata Therapeutics Inc., an affiliate of Allergan                               | Industry            | Interventional | Phase 3       | Safety/Efficacy  |
| 54 | Cempra Inc   National Institute of Allergy and Infectious Diseases               | Industry            | Interventional | Phase 3       | Efficacy         |
| 55 | Otonomy, Inc.                                                                    | Industry            | Interventional | Phase 3       | Efficacy         |
| 56 | Save the Children   University of North Carolina   UNC Children's Hospital       | Health Organisation | Interventional | Phase 4       | Efficacy         |
| 57 | Save the Children   University of North Carolina   UNC Children's Hospital       | Health Organisation | Interventional | Phase 4       | Efficacy         |
| 58 | Cempra Inc                                                                       | Industry            | Interventional | Phase 2-3     | Safety/Efficacy  |
| 59 | Cempra Inc                                                                       | Industry            | Interventional | Phase 3       | Safety/Efficacy  |
| 60 | Tanta University                                                                 | University          | Interventional | Phase 3       | Efficacy         |
| 61 | Murdoch Childrens Research Institute                                             | University          | Interventional | Not specified | Efficacy         |
| 62 | Astellas Pharma Europe B.V.   Merck Sharp & Dohme                                | Industry            | Interventional | Phase 3       | Safety/Efficacy  |

|    | P                                                  | Q               | R              | S              | T                |
|----|----------------------------------------------------|-----------------|----------------|----------------|------------------|
| 63 | Laboratorios Goulart S.A.                          | Industry        | Interventional | Phase 3        | Safety/Efficacy  |
| 64 | University Hospital, Ghent   Universitair Ziekenhu | University      | Interventional | Phase 4        | Pharmacokinetics |
| 65 | Malaria Consortium   World Health Organization     | Health Organisa | Interventional | Phase 4        | Safety           |
| 66 | PENTA Foundation   St George's, University of Lor  | Health Organisa | Interventional | Phase 2        | Safety/Efficacy  |
| 67 | Sigvard Mì   Istad   Public Health Agency of Swede | University      | Interventional | Phase 4        | Safety/Efficacy  |
| 68 | AstraZeneca   PRA Health Sciences                  | Industry        | Interventional | Phase 2-3      | Safety/Efficacy  |
| 69 | The Medicines Company                              | Industry        | Interventional | Phase 1        | Pharmacokinetics |
| 70 | Theravance Biopharma Antibiotics, Inc.             | Industry        | Interventional | Phase 4        | Pharmacokinetics |
| 71 | The Canberra Hospital                              | Hospital        | Interventional | Phase 2        | Pharmacokinetics |
| 72 | Chang Gung Memorial Hospital                       | Hospital        | Interventional | Phase 4        | Efficacy         |
| 73 | Darier                                             | Industry        | Interventional | Phase 4        | Safety/Efficacy  |
| 74 | Theravance Biopharma Antibiotics, Inc.             | Industry        | Observational  | Not applicable | Safety/Efficacy  |
| 75 | Grupo de Apoio ao Adolescente e a Crianca com      | Hospital        | Observational  | Not applicable | Pharmacokinetics |
| 76 | Infectopharm Arzneimittel GmbH   J&P Medical R     | Industry        | Observational  | Not applicable | Efficacy         |
| 77 | University of Maryland                             | University      | Interventional | Phase 2        | Safety/Efficacy  |

|    | U                               | V                        | W                    | X                 | Y                 | Z                  | AA                   | AB                            |
|----|---------------------------------|--------------------------|----------------------|-------------------|-------------------|--------------------|----------------------|-------------------------------|
| 1  | <b>Primary outcome variable</b> | <b>PK data collected</b> | <b>First Receive</b> | <b>Start Date</b> | <b>Completion</b> | <b>Last Update</b> | <b>Last Verified</b> | <b>Results First Received</b> |
| 2  | PK                              | PK study design          | July 2, 2015         | Sep-15            | Dec-18            | September 1, 2016  | Sep-16               | No Study Results Posted       |
| 3  | Efficacy                        | No PK data               | September 2, 2016    | Oct-16            | null              | October 12, 2016   | Oct-16               | No Study Results Posted       |
| 4  | Efficacy                        | No PK data               | September 8, 2016    | Sep-16            | null              | September 1, 2016  | Sep-16               | No Study Results Posted       |
| 5  | Efficacy                        | No PK data               | May 8, 2012          | May-12            | Apr-18            | June 27, 2016      | Jun-16               | No Study Results Posted       |
| 6  | Efficacy                        | No PK data               | March 2, 2016        | Mar-16            | May-18            | March 24, 2016     | Mar-16               | No Study Results Posted       |
| 7  | Efficacy                        | No PK data               | September 1, 2016    | Oct-16            | Mar-19            | October 13, 2016   | Oct-16               | No Study Results Posted       |
| 8  | PK                              | PK study design          | April 4, 2016        | Apr-16            | Sep-16            | April 25, 2016     | Apr-16               | No Study Results Posted       |
| 9  | Efficacy                        | No PK data               | September 2, 2016    | Oct-16            | Dec-17            | September 2, 2016  | Sep-16               | No Study Results Posted       |
| 10 | Efficacy                        | No PK data               | November 1, 2016     | Dec-10            | null              | September 1, 2016  | Sep-12               | No Study Results Posted       |
| 11 | Efficacy                        | No PK data               | November 2, 2016     | Mar-14            | Jul-16            | December 1, 2016   | Nov-15               | No Study Results Posted       |
| 12 | PK                              | Primary PK data          | January 26, 2012     | Apr-12            | Apr-18            | December 1, 2016   | Dec-15               | No Study Results Posted       |
| 13 | PK                              | PK study design          | May 18, 2015         | May-12            | null              | November 1, 2016   | Nov-15               | No Study Results Posted       |
| 14 | Efficacy                        | No PK data               | December 18, 2007    | Dec-07            | Sep-10            | June 3, 2008       | Aug-07               | No Study Results Posted       |
| 15 | Efficacy                        | No PK data               | October 17, 2007     | Nov-07            | Dec-09            | October 18, 2007   | Oct-07               | No Study Results Posted       |
| 16 | PK                              | PK study design          | August 17, 2011      | Nov-11            | Feb-17            | February 4, 2016   | Feb-16               | No Study Results Posted       |
| 17 | PK                              | PK study design          | June 12, 2015        | Nov-15            | Dec-17            | August 1, 2016     | Aug-16               | No Study Results Posted       |
| 18 | Efficacy                        | No PK data               | August 18, 2011      | Aug-11            | Dec-20            | August 30, 2016    | Aug-16               | No Study Results Posted       |
| 19 | PK                              | PK study design          | September 2, 2014    | Sep-14            | Nov-16            | October 31, 2016   | Oct-16               | No Study Results Posted       |
| 20 | Efficacy                        | No PK data               | March 23, 2009       | Mar-09            | Oct-12            | June 21, 2011      | Jun-11               | No Study Results Posted       |
| 21 | Safety                          | No PK data               | August 23, 2016      | Aug-16            | Dec-16            | September 1, 2016  | Sep-16               | No Study Results Posted       |
| 22 | Efficacy                        | No PK data               | January 3, 2011      | Mar-11            | Jun-15            | May 25, 2015       | May-15               | No Study Results Posted       |
| 23 | Safety                          | Secondary PK data        | October 9, 2016      | Mar-15            | Jan-18            | October 31, 2016   | Oct-16               | No Study Results Posted       |
| 24 | Safety                          | Primary PK data          | January 12, 2017     | Jan-17            | Dec-18            | September 8, 2016  | Sep-16               | No Study Results Posted       |
| 25 | Safety                          | No PK data               | September 1, 2016    | Jul-16            | Sep-18            | October 19, 2016   | Oct-16               | No Study Results Posted       |
| 26 | Efficacy                        | No PK data               | November 1, 2014     | Jan-14            | Jul-17            | May 6, 2016        | May-16               | No Study Results Posted       |
| 27 | Efficacy                        | No PK data               | August 21, 2013      | Aug-13            | Aug-15            | August 26, 2016    | Aug-14               | No Study Results Posted       |
| 28 | PK                              | PK study design          | May 11, 2016         | Aug-16            | Oct-22            | May 17, 2016       | May-16               | No Study Results Posted       |
| 29 | Safety                          | Primary PK data          | February 17, 2016    | Jul-16            | Sep-19            | October 6, 2016    | Oct-16               | No Study Results Posted       |
| 30 | Efficacy                        | No PK data               | May 5, 2016          | Jun-16            | Dec-20            | October 7, 2016    | Oct-16               | No Study Results Posted       |
| 31 | Safety                          | No PK data               | November 1, 2013     | Dec-13            | Sep-17            | August 1, 2016     | Aug-16               | No Study Results Posted       |



|    | U        | V                 | W             | X      | Y      | Z             | AA     | AB                      |
|----|----------|-------------------|---------------|--------|--------|---------------|--------|-------------------------|
| 32 | Efficacy | No PK data        | September 2   | Nov-14 | Dec-18 | December 20   | Dec-15 | No Study Results Posted |
| 33 | PK       | PK study design   | February 18,  | Apr-16 | May-17 | October 19, 2 | Oct-16 | No Study Results Posted |
| 34 | Efficacy | No PK data        | May 8, 2006   | Jan-04 | Dec-13 | February 6, 2 | Feb-12 | No Study Results Posted |
| 35 | PK       | PK study design   | April 1, 2016 | May-16 | Feb-18 | October 21, 2 | Oct-16 | No Study Results Posted |
| 36 | PK       | PK study design   | June 2, 2015  | Jan-16 | Dec-17 | April 18, 201 | Apr-16 | No Study Results Posted |
| 37 | PK       | PK study design   | October 1, 20 | Oct-16 | Oct-17 | October 24, 2 | Oct-16 | No Study Results Posted |
| 38 | PK       | PK study design   | February 24,  | Feb-16 | Feb-17 | March 8, 201  | Mar-16 | No Study Results Posted |
| 39 | Efficacy | No PK data        | February 23,  | Feb-12 | Jul-17 | February 19,  | Feb-16 | No Study Results Posted |
| 40 | PK       | PK study design   | August 23, 20 | Jun-06 | Dec-07 | August 23, 20 | Aug-06 | No Study Results Posted |
| 41 | Efficacy | No PK data        | January 30, 2 | Dec-12 | Dec-13 | February 6, 2 | Feb-13 | No Study Results Posted |
| 42 | Efficacy | No PK data        | September 8   | Feb-16 | Sep-20 | October 3, 20 | Oct-16 | No Study Results Posted |
| 43 | Efficacy | No PK data        | December 22   | Apr-07 | Apr-16 | April 8, 2014 | Apr-14 | No Study Results Posted |
| 44 | Safety   | Secondary PK data | December 31   | Jan-15 | Jan-20 | June 24, 201  | Jun-16 | No Study Results Posted |
| 45 | Efficacy | No PK data        | August 9, 20  | Dec-16 | Dec-19 | September 3   | Jul-16 | No Study Results Posted |
| 46 | Efficacy | No PK data        | July 24, 2016 | Dec-16 | Dec-20 | July 26, 2016 | Jul-16 | No Study Results Posted |
| 47 | Safety   | Secondary PK data | May 25, 2015  | Jul-15 | Oct-17 | October 21, 2 | Oct-16 | No Study Results Posted |
| 48 | Efficacy | No PK data        | November 4,   | Nov-14 | Jul-17 | June 3, 2016  | Jun-16 | No Study Results Posted |
| 49 | Efficacy | No PK data        | February 17,  | Jan-12 | Sep-12 | March 13, 20  | Mar-12 | No Study Results Posted |
| 50 | PK       | PK study design   | August 5, 20  | Aug-14 | Jun-17 | October 20, 2 | Oct-16 | No Study Results Posted |
| 51 | PK       | PK study design   | August 5, 20  | Sep-14 | Sep-17 | March 17, 20  | Mar-16 | No Study Results Posted |
| 52 | Safety   | Secondary PK data | June 16, 201  | Sep-15 | Oct-17 | October 21, 2 | Oct-16 | No Study Results Posted |
| 53 | Efficacy | No PK data        | June 8, 2016  | Jun-16 | Jul-18 | June 23, 201  | Jun-16 | No Study Results Posted |
| 54 | Efficacy | No PK data        | August 1, 20  | Aug-14 | Apr-17 | September 2   | Sep-16 | No Study Results Posted |
| 55 | Efficacy | No PK data        | June 13, 201  | Jun-16 | Nov-16 | June 13, 201  | Jun-16 | No Study Results Posted |
| 56 | Efficacy | No PK data        | May 1, 2016   | Jun-16 | Sep-18 | June 10, 201  | Jun-16 | No Study Results Posted |
| 57 | Efficacy | No PK data        | February 3, 2 | Mar-16 | null   | June 10, 201  | Jun-16 | No Study Results Posted |
| 58 | Safety   | No PK data        | November 10   | Mar-16 | Jan-18 | September 1   | Sep-16 | No Study Results Posted |
| 59 | Efficacy | No PK data        | October 5, 20 | Nov-15 | Feb-17 | October 5, 20 | Oct-16 | No Study Results Posted |
| 60 | Efficacy | No PK data        | May 11, 2015  | Jan-15 | Dec-16 | May 9, 2016   | May-16 | No Study Results Posted |
| 61 | Efficacy | No PK data        | January 4, 20 | Jan-15 | Jan-17 | March 16, 20  | Mar-16 | No Study Results Posted |
| 62 | Efficacy | No PK data        | August 11, 20 | Oct-14 | Feb-17 | June 17, 201  | Jun-16 | No Study Results Posted |

|    | U        | V                 | W             | X      | Y      | Z             | AA     | AB                      |
|----|----------|-------------------|---------------|--------|--------|---------------|--------|-------------------------|
| 63 | Efficacy | No PK data        | December 14,  | May-10 | Oct-10 | March 18, 20  | Dec-09 | No Study Results Posted |
| 64 | PK       | PK study design   | November 4,   | Apr-15 | Apr-16 | November 4,   | Nov-15 | No Study Results Posted |
| 65 | Safety   | No PK data        | August 17, 20 | Oct-16 | Jul-17 | October 3, 20 | Oct-16 | No Study Results Posted |
| 66 | Efficacy | Secondary PK data | April 7, 2016 | Jul-16 | Mar-18 | May 31, 2016  | May-16 | No Study Results Posted |
| 67 | Efficacy | No PK data        | March 4, 201  | Sep-15 | Oct-16 | October 4, 20 | Oct-16 | No Study Results Posted |
| 68 | Safety   | Secondary PK data | February 23,  | Aug-15 | Oct-17 | October 14, 2 | Oct-16 | No Study Results Posted |
| 69 | PK       | PK study design   | May 7, 2014   | May-14 | Dec-16 | November 4,   | Nov-15 | No Study Results Posted |
| 70 | PK       | PK study design   | December 11   | Dec-14 | Aug-16 | June 24, 2010 | Jun-16 | No Study Results Posted |
| 71 | PK       | PK study design   | August 31, 20 | Aug-11 | Jul-12 | September 1   | Aug-11 | No Study Results Posted |
| 72 | Efficacy | No PK data        | November 25   | Aug-10 | Jul-12 | January 14, 2 | Nov-10 | No Study Results Posted |
| 73 | Efficacy | No PK data        | September 3   | Jun-09 | Apr-10 | September 3   | Sep-09 | No Study Results Posted |
| 74 | Efficacy | No PK data        | November 5,   | Nov-14 | Sep-18 | June 29, 2010 | Jun-16 | No Study Results Posted |
| 75 | PK       | Primary PK data   | February 24,  | Jan-11 | null   | March 21, 20  | Mar-12 | No Study Results Posted |
| 76 | Efficacy | No PK data        | July 29, 2010 | Aug-10 | null   | February 5, 2 | Feb-16 | No Study Results Posted |
| 77 | Efficacy | Secondary PK data | January 22, 2 | Jul-13 | Dec-21 | May 28, 2015  | May-15 | No Study Results Posted |

|    | AC                 | AD                                                                                                    | AE | AF | AG |
|----|--------------------|-------------------------------------------------------------------------------------------------------|----|----|----|
| 1  | <b>Primary Com</b> | <b>URL</b>                                                                                            |    |    |    |
| 2  | Jul-18             | <a href="https://ClinicalTrials.gov/show/NCT02539407">https://ClinicalTrials.gov/show/NCT02539407</a> |    |    |    |
| 3  | Dec-18             | <a href="https://ClinicalTrials.gov/show/NCT02935374">https://ClinicalTrials.gov/show/NCT02935374</a> |    |    |    |
| 4  | Sep-18             | <a href="https://ClinicalTrials.gov/show/NCT02899143">https://ClinicalTrials.gov/show/NCT02899143</a> |    |    |    |
| 5  | Apr-18             | <a href="https://ClinicalTrials.gov/show/NCT01595529">https://ClinicalTrials.gov/show/NCT01595529</a> |    |    |    |
| 6  | Feb-18             | <a href="https://ClinicalTrials.gov/show/NCT02380352">https://ClinicalTrials.gov/show/NCT02380352</a> |    |    |    |
| 7  | Jan-19             | <a href="https://ClinicalTrials.gov/show/NCT02891915">https://ClinicalTrials.gov/show/NCT02891915</a> |    |    |    |
| 8  | Sep-16             | <a href="https://ClinicalTrials.gov/show/NCT02746276">https://ClinicalTrials.gov/show/NCT02746276</a> |    |    |    |
| 9  | Aug-17             | <a href="https://ClinicalTrials.gov/show/NCT02917551">https://ClinicalTrials.gov/show/NCT02917551</a> |    |    |    |
| 10 | Jun-13             | <a href="https://ClinicalTrials.gov/show/NCT01243437">https://ClinicalTrials.gov/show/NCT01243437</a> |    |    |    |
| 11 | Mar-16             | <a href="https://ClinicalTrials.gov/show/NCT02635191">https://ClinicalTrials.gov/show/NCT02635191</a> |    |    |    |
| 12 | Dec-16             | <a href="https://ClinicalTrials.gov/show/NCT01522105">https://ClinicalTrials.gov/show/NCT01522105</a> |    |    |    |
| 13 | Dec-17             | <a href="https://ClinicalTrials.gov/show/NCT02456974">https://ClinicalTrials.gov/show/NCT02456974</a> |    |    |    |
| 14 | Sep-10             | <a href="https://ClinicalTrials.gov/show/NCT00579956">https://ClinicalTrials.gov/show/NCT00579956</a> |    |    |    |
| 15 | null               | <a href="https://ClinicalTrials.gov/show/NCT00545961">https://ClinicalTrials.gov/show/NCT00545961</a> |    |    |    |
| 16 | Feb-17             | <a href="https://ClinicalTrials.gov/show/NCT01431326">https://ClinicalTrials.gov/show/NCT01431326</a> |    |    |    |
| 17 | Nov-17             | <a href="https://ClinicalTrials.gov/show/NCT02475876">https://ClinicalTrials.gov/show/NCT02475876</a> |    |    |    |
| 18 | Dec-20             | <a href="https://ClinicalTrials.gov/show/NCT01420341">https://ClinicalTrials.gov/show/NCT01420341</a> |    |    |    |
| 19 | Nov-16             | <a href="https://ClinicalTrials.gov/show/NCT02266706">https://ClinicalTrials.gov/show/NCT02266706</a> |    |    |    |
| 20 | Sep-12             | <a href="https://ClinicalTrials.gov/show/NCT00867789">https://ClinicalTrials.gov/show/NCT00867789</a> |    |    |    |
| 21 | Dec-16             | <a href="https://ClinicalTrials.gov/show/NCT02879981">https://ClinicalTrials.gov/show/NCT02879981</a> |    |    |    |
| 22 | Jun-15             | <a href="https://ClinicalTrials.gov/show/NCT01269541">https://ClinicalTrials.gov/show/NCT01269541</a> |    |    |    |
| 23 | Jan-18             | <a href="https://ClinicalTrials.gov/show/NCT02276482">https://ClinicalTrials.gov/show/NCT02276482</a> |    |    |    |
| 24 | Dec-18             | <a href="https://ClinicalTrials.gov/show/NCT02663596">https://ClinicalTrials.gov/show/NCT02663596</a> |    |    |    |
| 25 | Sep-17             | <a href="https://ClinicalTrials.gov/show/NCT02555059">https://ClinicalTrials.gov/show/NCT02555059</a> |    |    |    |
| 26 | Apr-17             | <a href="https://ClinicalTrials.gov/show/NCT02297815">https://ClinicalTrials.gov/show/NCT02297815</a> |    |    |    |
| 27 | Dec-14             | <a href="https://ClinicalTrials.gov/show/NCT02224040">https://ClinicalTrials.gov/show/NCT02224040</a> |    |    |    |
| 28 | Aug-22             | <a href="https://ClinicalTrials.gov/show/NCT02775968">https://ClinicalTrials.gov/show/NCT02775968</a> |    |    |    |
| 29 | Aug-19             | <a href="https://ClinicalTrials.gov/show/NCT02687906">https://ClinicalTrials.gov/show/NCT02687906</a> |    |    |    |
| 30 | Dec-19             | <a href="https://ClinicalTrials.gov/show/NCT02783859">https://ClinicalTrials.gov/show/NCT02783859</a> |    |    |    |
| 31 | Apr-17             | <a href="https://ClinicalTrials.gov/show/NCT01994993">https://ClinicalTrials.gov/show/NCT01994993</a> |    |    |    |

|    | AC     | AD                                                                                                    | AE | AF | AG |
|----|--------|-------------------------------------------------------------------------------------------------------|----|----|----|
| 32 | Dec-17 | <a href="https://ClinicalTrials.gov/show/NCT02258763">https://ClinicalTrials.gov/show/NCT02258763</a> |    |    |    |
| 33 | May-17 | <a href="https://ClinicalTrials.gov/show/NCT02688790">https://ClinicalTrials.gov/show/NCT02688790</a> |    |    |    |
| 34 | Dec-12 | <a href="https://ClinicalTrials.gov/show/NCT00323219">https://ClinicalTrials.gov/show/NCT00323219</a> |    |    |    |
| 35 | Feb-18 | <a href="https://ClinicalTrials.gov/show/NCT02750761">https://ClinicalTrials.gov/show/NCT02750761</a> |    |    |    |
| 36 | Dec-17 | <a href="https://ClinicalTrials.gov/show/NCT02466438">https://ClinicalTrials.gov/show/NCT02466438</a> |    |    |    |
| 37 | Sep-17 | <a href="https://ClinicalTrials.gov/show/NCT02260102">https://ClinicalTrials.gov/show/NCT02260102</a> |    |    |    |
| 38 | Jun-16 | <a href="https://ClinicalTrials.gov/show/NCT02694458">https://ClinicalTrials.gov/show/NCT02694458</a> |    |    |    |
| 39 | Feb-17 | <a href="https://ClinicalTrials.gov/show/NCT01540838">https://ClinicalTrials.gov/show/NCT01540838</a> |    |    |    |
| 40 | null   | <a href="https://ClinicalTrials.gov/show/NCT00368498">https://ClinicalTrials.gov/show/NCT00368498</a> |    |    |    |
| 41 | Dec-13 | <a href="https://ClinicalTrials.gov/show/NCT01785641">https://ClinicalTrials.gov/show/NCT01785641</a> |    |    |    |
| 42 | Sep-20 | <a href="https://ClinicalTrials.gov/show/NCT02554383">https://ClinicalTrials.gov/show/NCT02554383</a> |    |    |    |
| 43 | Mar-16 | <a href="https://ClinicalTrials.gov/show/NCT01265173">https://ClinicalTrials.gov/show/NCT01265173</a> |    |    |    |
| 44 | Jan-17 | <a href="https://ClinicalTrials.gov/show/NCT02335905">https://ClinicalTrials.gov/show/NCT02335905</a> |    |    |    |
| 45 | Dec-19 | <a href="https://ClinicalTrials.gov/show/NCT02922686">https://ClinicalTrials.gov/show/NCT02922686</a> |    |    |    |
| 46 | Dec-20 | <a href="https://ClinicalTrials.gov/show/NCT02848820">https://ClinicalTrials.gov/show/NCT02848820</a> |    |    |    |
| 47 | Oct-17 | <a href="https://ClinicalTrials.gov/show/NCT02475733">https://ClinicalTrials.gov/show/NCT02475733</a> |    |    |    |
| 48 | May-17 | <a href="https://ClinicalTrials.gov/show/NCT02372461">https://ClinicalTrials.gov/show/NCT02372461</a> |    |    |    |
| 49 | Aug-12 | <a href="https://ClinicalTrials.gov/show/NCT01553006">https://ClinicalTrials.gov/show/NCT01553006</a> |    |    |    |
| 50 | Mar-17 | <a href="https://ClinicalTrials.gov/show/NCT02527681">https://ClinicalTrials.gov/show/NCT02527681</a> |    |    |    |
| 51 | Sep-17 | <a href="https://ClinicalTrials.gov/show/NCT02210169">https://ClinicalTrials.gov/show/NCT02210169</a> |    |    |    |
| 52 | Oct-17 | <a href="https://ClinicalTrials.gov/show/NCT02497781">https://ClinicalTrials.gov/show/NCT02497781</a> |    |    |    |
| 53 | Apr-18 | <a href="https://ClinicalTrials.gov/show/NCT02814916">https://ClinicalTrials.gov/show/NCT02814916</a> |    |    |    |
| 54 | Apr-17 | <a href="https://ClinicalTrials.gov/show/NCT02210325">https://ClinicalTrials.gov/show/NCT02210325</a> |    |    |    |
| 55 | Nov-16 | <a href="https://ClinicalTrials.gov/show/NCT02801370">https://ClinicalTrials.gov/show/NCT02801370</a> |    |    |    |
| 56 | Aug-18 | <a href="https://ClinicalTrials.gov/show/NCT02760420">https://ClinicalTrials.gov/show/NCT02760420</a> |    |    |    |
| 57 | Aug-18 | <a href="https://ClinicalTrials.gov/show/NCT02678195">https://ClinicalTrials.gov/show/NCT02678195</a> |    |    |    |
| 58 | Dec-17 | <a href="https://ClinicalTrials.gov/show/NCT02605122">https://ClinicalTrials.gov/show/NCT02605122</a> |    |    |    |
| 59 | Feb-17 | <a href="https://ClinicalTrials.gov/show/NCT02570490">https://ClinicalTrials.gov/show/NCT02570490</a> |    |    |    |
| 60 | Dec-16 | <a href="https://ClinicalTrials.gov/show/NCT02443285">https://ClinicalTrials.gov/show/NCT02443285</a> |    |    |    |
| 61 | Jan-17 | <a href="https://ClinicalTrials.gov/show/NCT02334124">https://ClinicalTrials.gov/show/NCT02334124</a> |    |    |    |
| 62 | Feb-17 | <a href="https://ClinicalTrials.gov/show/NCT02218372">https://ClinicalTrials.gov/show/NCT02218372</a> |    |    |    |

|    | AC     | AD                                                                                                            | AE | AF | AG |
|----|--------|---------------------------------------------------------------------------------------------------------------|----|----|----|
| 63 | Jul-10 | <a href="https://ClinicalTrials.gov/show/NCT01032499">https://ClinicalTrials.gov/show/NCT01032499</a>         |    |    |    |
| 64 | Feb-16 | <a href="https://ClinicalTrials.gov/show/NCT02598362">https://ClinicalTrials.gov/show/NCT02598362</a>         |    |    |    |
| 65 | Mar-17 | <a href="https://ClinicalTrials.gov/show/NCT02878031">https://ClinicalTrials.gov/show/NCT02878031</a>         |    |    |    |
| 66 | Dec-17 | <a href="https://ClinicalTrials.gov/show/NCT02790996">https://ClinicalTrials.gov/show/NCT02790996</a>         |    |    |    |
| 67 | Oct-16 | <a href="https://ClinicalTrials.gov/show/NCT02712307">https://ClinicalTrials.gov/show/NCT02712307</a>         |    |    |    |
| 68 | Oct-17 | <a href="https://ClinicalTrials.gov/show/NCT02424734">https://ClinicalTrials.gov/show/NCT02424734</a>         |    |    |    |
| 69 | Dec-16 | <a href="https://ClinicalTrials.gov/show/NCT02134301">https://ClinicalTrials.gov/show/NCT02134301</a>         |    |    |    |
| 70 | Aug-16 | <a href="https://ClinicalTrials.gov/show/NCT02013141">https://ClinicalTrials.gov/show/NCT02013141</a>         |    |    |    |
| 71 | Jul-12 | <a href="https://ClinicalTrials.gov/show/NCT01427842">https://ClinicalTrials.gov/show/NCT01427842</a>         |    |    |    |
| 72 | Jun-11 | <a href="https://ClinicalTrials.gov/show/NCT01278017">https://ClinicalTrials.gov/show/NCT01278017</a>         |    |    |    |
| 73 | Feb-10 | <a href="https://ClinicalTrials.gov/show/NCT00988026">https://ClinicalTrials.gov/show/NCT00988026</a>         |    |    |    |
| 74 | Jun-18 | <a href="https://ClinicalTrials.gov/show/NCT02288234">https://ClinicalTrials.gov/show/NCT02288234</a>         |    |    |    |
| 75 | null   | <a href="https://ClinicalTrials.gov/show/NCT01304459">https://ClinicalTrials.gov/show/NCT01304459</a>         |    |    |    |
| 76 | Dec-16 | <a href="https://ClinicalTrials.gov/show/NCT01173575">https://ClinicalTrials.gov/show/NCT01173575</a>         |    |    |    |
| 77 | Dec-19 | <a href="https://clinicaltrials.gov/ct2/show/NCT01778634">https://clinicaltrials.gov/ct2/show/NCT01778634</a> |    |    |    |
